# Supplementary material for: Determining the probability of hemiplasy in the presence of incomplete lineage sorting and introgression
Source: eLife. 2020 Dec 21;9:e63753. doi: 10.7554/eLife.63753 (PMC7800383; doi:10.7554/eLife.63753)
Supplement: Figure 4—source data 1. — The value of Pe/Po is reported for each parameter combination. Data for each panel is in separate tabs. [file elife-63753-fig4-data1.xlsx]

## Sheet: Fig4A
		Time between speciation and introgression
		0.01	0.019899	0.029798	0.039697	0.049596	0.0594949	0.0693939	0.0792929	0.0891919	0.0990909	0.10899	0.118889	0.128788	0.138687	0.148586	0.158485	0.168384	0.178283	0.188182	0.198081	0.20798	0.217879	0.227778	0.237677	0.247576	0.257475	0.267374	0.277273	0.287172	0.297071	0.30697	0.316869	0.326768	0.336667	0.346566	0.356465	0.366364	0.376263	0.386162	0.396061	0.40596	0.415859	0.425758	0.435657	0.445556	0.455455	0.465354	0.475253
Admixture proportion	0	0.818356	0.818356	0.818356	0.818356	0.818356	0.818356	0.818356	0.818356	0.818356	0.818356	0.818356	0.818356	0.818356	0.818356	0.818356	0.818356	0.818356	0.818356	0.818356	0.818356	0.818356	0.818356	0.818356	0.818356	0.818356	0.818356	0.818356	0.818356	0.818356	0.818356	0.818356	0.818356	0.818356	0.818356	0.818356	0.818356	0.818356	0.818356	0.818356	0.818356	0.818356	0.818356	0.818356	0.818356	0.818356	0.818356	0.818356	0.818356
	0.0010101	0.864874	0.865151	0.865428	0.865707	0.865986	0.866265	0.866545	0.866826	0.867107	0.867389	0.867671	0.867954	0.868238	0.868522	0.868807	0.869092	0.869377	0.869664	0.86995	0.870238	0.870525	0.870814	0.871102	0.871392	0.871682	0.871972	0.872263	0.872554	0.872846	0.873138	0.87343	0.873724	0.874017	0.874311	0.874606	0.874901	0.875196	0.875492	0.875788	0.876085	0.876382	0.876679	0.876977	0.877276	0.877574	0.877874	0.878173	0.878473
	0.0020202	0.911387	0.911942	0.912497	0.913054	0.913612	0.914171	0.914731	0.915293	0.915855	0.916419	0.916984	0.91755	0.918117	0.918685	0.919255	0.919825	0.920397	0.920969	0.921543	0.922118	0.922693	0.92327	0.923848	0.924427	0.925006	0.925587	0.926169	0.926752	0.927335	0.92792	0.928505	0.929092	0.929679	0.930267	0.930856	0.931447	0.932037	0.932629	0.933222	0.933816	0.93441	0.935005	0.935601	0.936198	0.936796	0.937394	0.937994	0.938594
	0.0030303	0.957897	0.958729	0.959562	0.960397	0.961234	0.962073	0.962914	0.963756	0.964601	0.965446	0.966294	0.967143	0.967994	0.968847	0.969701	0.970557	0.971415	0.972274	0.973135	0.973997	0.974861	0.975726	0.976593	0.977461	0.978331	0.979202	0.980075	0.98095	0.981825	0.982702	0.983581	0.984461	0.985342	0.986225	0.987109	0.987994	0.988881	0.989769	0.990658	0.991549	0.992441	0.993334	0.994228	0.995124	0.996021	0.996919	0.997818	0.998718
	0.0040404	1.0044	1.00551	1.00662	1.00774	1.00885	1.00997	1.01109	1.01222	1.01334	1.01447	1.0156	1.01673	1.01787	1.01901	1.02015	1.02129	1.02243	1.02358	1.02472	1.02587	1.02703	1.02818	1.02934	1.0305	1.03166	1.03282	1.03398	1.03515	1.03632	1.03749	1.03866	1.03983	1.04101	1.04218	1.04336	1.04454	1.04573	1.04691	1.0481	1.04928	1.05047	1.05166	1.05286	1.05405	1.05525	1.05645	1.05765	1.05885
	0.00505051	1.0509	1.05229	1.05368	1.05507	1.05647	1.05787	1.05927	1.06068	1.06208	1.06349	1.06491	1.06632	1.06774	1.06916	1.07059	1.07202	1.07345	1.07488	1.07631	1.07775	1.07919	1.08064	1.08208	1.08353	1.08498	1.08643	1.08789	1.08935	1.09081	1.09227	1.09373	1.0952	1.09667	1.09814	1.09962	1.10109	1.10257	1.10405	1.10554	1.10702	1.10851	1.11	1.11149	1.11298	1.11448	1.11598	1.11748	1.11898
	0.00606061	1.0974	1.09907	1.10074	1.10241	1.10408	1.10576	1.10744	1.10913	1.11082	1.11251	1.11421	1.11591	1.11761	1.11932	1.12103	1.12274	1.12446	1.12618	1.1279	1.12963	1.13136	1.13309	1.13482	1.13656	1.1383	1.14005	1.14179	1.14354	1.1453	1.14705	1.14881	1.15057	1.15234	1.1541	1.15587	1.15765	1.15942	1.1612	1.16298	1.16476	1.16655	1.16834	1.17013	1.17192	1.17371	1.17551	1.17731	1.17912
	0.00707071	1.1439	1.14584	1.14779	1.14974	1.15169	1.15365	1.15561	1.15758	1.15955	1.16153	1.16351	1.16549	1.16748	1.16947	1.17147	1.17347	1.17547	1.17748	1.17949	1.1815	1.18352	1.18554	1.18757	1.18959	1.19163	1.19366	1.1957	1.19774	1.19979	1.20184	1.20389	1.20595	1.208	1.21007	1.21213	1.2142	1.21627	1.21835	1.22042	1.2225	1.22459	1.22667	1.22876	1.23086	1.23295	1.23505	1.23715	1.23925
	0.00808081	1.19039	1.19261	1.19483	1.19706	1.1993	1.20154	1.20378	1.20603	1.20829	1.21054	1.21281	1.21508	1.21735	1.21962	1.22191	1.22419	1.22648	1.22877	1.23107	1.23338	1.23568	1.23799	1.24031	1.24263	1.24495	1.24728	1.24961	1.25194	1.25428	1.25662	1.25897	1.26132	1.26367	1.26603	1.26839	1.27076	1.27312	1.2755	1.27787	1.28025	1.28263	1.28502	1.28741	1.2898	1.29219	1.29459	1.29699	1.2994
	0.00909091	1.23687	1.23937	1.24188	1.24439	1.2469	1.24942	1.25195	1.25448	1.25701	1.25956	1.2621	1.26465	1.26721	1.26977	1.27234	1.27491	1.27749	1.28007	1.28266	1.28525	1.28784	1.29044	1.29305	1.29566	1.29827	1.30089	1.30351	1.30614	1.30877	1.31141	1.31405	1.31669	1.31934	1.322	1.32465	1.32731	1.32998	1.33265	1.33532	1.338	1.34068	1.34336	1.34605	1.34874	1.35144	1.35414	1.35684	1.35955
	0.010101	1.28336	1.28613	1.28892	1.29171	1.2945	1.2973	1.30011	1.30292	1.30574	1.30857	1.3114	1.31423	1.31707	1.31992	1.32277	1.32563	1.3285	1.33137	1.33424	1.33712	1.34	1.34289	1.34579	1.34869	1.3516	1.35451	1.35742	1.36034	1.36327	1.3662	1.36913	1.37207	1.37501	1.37796	1.38091	1.38387	1.38683	1.3898	1.39277	1.39575	1.39873	1.40171	1.4047	1.40769	1.41069	1.41369	1.41669	1.4197
	0.0111111	1.32984	1.33289	1.33595	1.33902	1.3421	1.34518	1.34827	1.35136	1.35446	1.35757	1.36069	1.36381	1.36693	1.37007	1.37321	1.37635	1.3795	1.38266	1.38582	1.38899	1.39216	1.39534	1.39853	1.40172	1.40492	1.40812	1.41133	1.41454	1.41776	1.42098	1.42421	1.42745	1.43069	1.43393	1.43718	1.44043	1.44369	1.44696	1.45022	1.4535	1.45678	1.46006	1.46335	1.46664	1.46994	1.47324	1.47654	1.47985
	0.0121212	1.37631	1.37964	1.38299	1.38633	1.38969	1.39305	1.39642	1.3998	1.40318	1.40658	1.40997	1.41338	1.41679	1.42021	1.42364	1.42707	1.43051	1.43395	1.4374	1.44086	1.44432	1.44779	1.45127	1.45475	1.45824	1.46173	1.46524	1.46874	1.47225	1.47577	1.47929	1.48282	1.48636	1.4899	1.49344	1.497	1.50055	1.50411	1.50768	1.51125	1.51483	1.51841	1.522	1.52559	1.52919	1.53279	1.5364	1.54001
	0.0131313	1.42278	1.42639	1.43001	1.43364	1.43728	1.44092	1.44458	1.44824	1.4519	1.45558	1.45926	1.46295	1.46665	1.47035	1.47406	1.47778	1.48151	1.48524	1.48898	1.49273	1.49648	1.50024	1.50401	1.50778	1.51156	1.51535	1.51914	1.52294	1.52675	1.53056	1.53438	1.5382	1.54203	1.54587	1.54971	1.55356	1.55741	1.56127	1.56514	1.56901	1.57289	1.57677	1.58066	1.58455	1.58845	1.59235	1.59626	1.60018
	0.0141414	1.46925	1.47314	1.47704	1.48095	1.48487	1.48879	1.49272	1.49667	1.50062	1.50458	1.50854	1.51252	1.5165	1.52049	1.52449	1.52849	1.53251	1.53653	1.54056	1.54459	1.54864	1.55269	1.55675	1.56081	1.56488	1.56896	1.57305	1.57714	1.58124	1.58535	1.58946	1.59358	1.59771	1.60184	1.60598	1.61012	1.61428	1.61843	1.6226	1.62677	1.63094	1.63513	1.63932	1.64351	1.64771	1.65191	1.65613	1.66034
	0.0151515	1.51571	1.51988	1.52406	1.52825	1.53245	1.53666	1.54087	1.5451	1.54933	1.55357	1.55782	1.56208	1.56635	1.57063	1.57491	1.57921	1.58351	1.58782	1.59213	1.59646	1.60079	1.60514	1.60948	1.61384	1.61821	1.62258	1.62696	1.63134	1.63574	1.64014	1.64455	1.64896	1.65338	1.65781	1.66225	1.66669	1.67114	1.6756	1.68006	1.68453	1.68901	1.69349	1.69798	1.70247	1.70697	1.71148	1.71599	1.72051
	0.0161616	1.56217	1.56662	1.57108	1.57555	1.58003	1.58452	1.58901	1.59352	1.59804	1.60257	1.6071	1.61165	1.6162	1.62076	1.62534	1.62992	1.63451	1.6391	1.64371	1.64833	1.65295	1.65758	1.66222	1.66687	1.67153	1.67619	1.68086	1.68554	1.69023	1.69493	1.69963	1.70434	1.70906	1.71379	1.71852	1.72326	1.72801	1.73276	1.73752	1.74229	1.74707	1.75185	1.75664	1.76144	1.76624	1.77105	1.77587	1.78069
	0.0171717	1.60863	1.61336	1.6181	1.62284	1.6276	1.63237	1.63715	1.64195	1.64675	1.65156	1.65638	1.66121	1.66605	1.6709	1.67576	1.68062	1.6855	1.69039	1.69528	1.70019	1.7051	1.71003	1.71496	1.7199	1.72485	1.7298	1.73477	1.73974	1.74473	1.74972	1.75472	1.75972	1.76474	1.76976	1.77479	1.77983	1.78488	1.78993	1.79499	1.80006	1.80514	1.81022	1.81531	1.82041	1.82551	1.83062	1.83574	1.84087
	0.0181818	1.65508	1.66009	1.66511	1.67014	1.67518	1.68023	1.68529	1.69037	1.69545	1.70054	1.70565	1.71077	1.71589	1.72103	1.72617	1.73133	1.7365	1.74167	1.74686	1.75205	1.75726	1.76247	1.76769	1.77293	1.77817	1.78342	1.78868	1.79395	1.79922	1.80451	1.8098	1.81511	1.82042	1.82574	1.83107	1.8364	1.84175	1.8471	1.85246	1.85783	1.8632	1.86859	1.87398	1.87938	1.88479	1.8902	1.89562	1.90105
	0.0191919	1.70153	1.70682	1.71211	1.71742	1.72275	1.72808	1.73343	1.73878	1.74415	1.74953	1.75492	1.76032	1.76573	1.77116	1.77659	1.78203	1.78749	1.79295	1.79843	1.80391	1.80941	1.81491	1.82043	1.82595	1.83149	1.83703	1.84258	1.84815	1.85372	1.8593	1.86489	1.87049	1.8761	1.88172	1.88734	1.89298	1.89862	1.90427	1.90993	1.9156	1.92128	1.92696	1.93265	1.93835	1.94406	1.94978	1.9555	1.96124
	0.020202	1.74797	1.75354	1.75912	1.76471	1.77031	1.77593	1.78156	1.7872	1.79285	1.79851	1.80419	1.80988	1.81557	1.82128	1.82701	1.83274	1.83848	1.84423	1.85	1.85577	1.86156	1.86736	1.87316	1.87898	1.88481	1.89064	1.89649	1.90235	1.90822	1.91409	1.91998	1.92587	1.93178	1.93769	1.94362	1.94955	1.95549	1.96144	1.9674	1.97337	1.97935	1.98533	1.99133	1.99733	2.00334	2.00936	2.01539	2.02143
	0.0212121	1.79441	1.80026	1.80612	1.81199	1.81788	1.82377	1.82969	1.83561	1.84155	1.84749	1.85345	1.85943	1.86541	1.87141	1.87742	1.88344	1.88947	1.89551	1.90157	1.90763	1.91371	1.9198	1.9259	1.93201	1.93813	1.94426	1.9504	1.95655	1.96271	1.96889	1.97507	1.98126	1.98746	1.99367	1.9999	2.00613	2.01237	2.01862	2.02488	2.03115	2.03743	2.04371	2.05001	2.05631	2.06263	2.06895	2.07528	2.08162
	0.0222222	1.84085	1.84698	1.85312	1.85927	1.86544	1.87162	1.87781	1.88402	1.89024	1.89647	1.90272	1.90898	1.91525	1.92153	1.92783	1.93414	1.94046	1.94679	1.95314	1.95949	1.96586	1.97224	1.97863	1.98503	1.99145	1.99787	2.00431	2.01075	2.01721	2.02368	2.03016	2.03665	2.04315	2.04966	2.05618	2.06271	2.06925	2.0758	2.08236	2.08893	2.0955	2.10209	2.10869	2.1153	2.12191	2.12854	2.13517	2.14182
	0.0232323	1.88728	1.89369	1.90011	1.90654	1.91299	1.91946	1.92593	1.93242	1.93893	1.94545	1.95198	1.95852	1.96508	1.97165	1.97824	1.98484	1.99144	1.99807	2.0047	2.01135	2.01801	2.02468	2.03136	2.03806	2.04477	2.05148	2.05821	2.06496	2.07171	2.07847	2.08525	2.09203	2.09883	2.10564	2.11246	2.11929	2.12613	2.13298	2.13984	2.14671	2.15359	2.16048	2.16738	2.17429	2.18121	2.18813	2.19507	2.20202
	0.0242424	1.93371	1.9404	1.9471	1.95381	1.96055	1.96729	1.97405	1.98083	1.98762	1.99442	2.00124	2.00807	2.01491	2.02177	2.02865	2.03553	2.04243	2.04934	2.05627	2.06321	2.07016	2.07712	2.0841	2.09108	2.09808	2.1051	2.11212	2.11916	2.12621	2.13327	2.14034	2.14742	2.15452	2.16162	2.16874	2.17587	2.18301	2.19016	2.19732	2.20449	2.21167	2.21886	2.22606	2.23328	2.2405	2.24773	2.25497	2.26223
	0.0252525	1.98014	1.9871	1.99408	2.00108	2.0081	2.01512	2.02217	2.02923	2.0363	2.04339	2.05049	2.05761	2.06474	2.07189	2.07905	2.08623	2.09341	2.10062	2.10783	2.11506	2.1223	2.12956	2.13683	2.14411	2.1514	2.15871	2.16603	2.17336	2.18071	2.18806	2.19543	2.20281	2.2102	2.21761	2.22502	2.23245	2.23989	2.24734	2.2548	2.26227	2.26976	2.27725	2.28475	2.29227	2.2998	2.30733	2.31488	2.32244
	0.0262626	2.02656	2.0338	2.04107	2.04835	2.05564	2.06295	2.07028	2.07762	2.08498	2.09236	2.09975	2.10715	2.11457	2.12201	2.12945	2.13692	2.1444	2.15189	2.15939	2.16691	2.17445	2.182	2.18956	2.19713	2.20472	2.21232	2.21994	2.22756	2.2352	2.24286	2.25052	2.2582	2.26589	2.27359	2.28131	2.28904	2.29677	2.30452	2.31229	2.32006	2.32785	2.33564	2.34345	2.35127	2.3591	2.36694	2.37479	2.38265
	0.0272727	2.07298	2.0805	2.08805	2.09561	2.10319	2.11078	2.11839	2.12602	2.13366	2.14132	2.149	2.15669	2.1644	2.17212	2.17986	2.18761	2.19538	2.20316	2.21096	2.21877	2.22659	2.23443	2.24229	2.25016	2.25804	2.26594	2.27384	2.28177	2.2897	2.29765	2.30562	2.31359	2.32158	2.32958	2.3376	2.34562	2.35366	2.36171	2.36977	2.37785	2.38594	2.39404	2.40215	2.41027	2.4184	2.42654	2.4347	2.44287
	0.0282828	2.11939	2.1272	2.13502	2.14287	2.15073	2.1586	2.1665	2.17441	2.18234	2.19028	2.19825	2.20622	2.21422	2.22223	2.23026	2.2383	2.24635	2.25443	2.26252	2.27062	2.27874	2.28687	2.29502	2.30318	2.31136	2.31955	2.32775	2.33597	2.3442	2.35245	2.36071	2.36898	2.37727	2.38557	2.39388	2.40221	2.41055	2.4189	2.42727	2.43564	2.44403	2.45243	2.46085	2.46927	2.47771	2.48616	2.49462	2.50309
	0.0292929	2.1658	2.17389	2.18199	2.19012	2.19826	2.20642	2.2146	2.2228	2.23101	2.23924	2.24749	2.25576	2.26404	2.27234	2.28065	2.28898	2.29733	2.3057	2.31407	2.32247	2.33088	2.33931	2.34775	2.3562	2.36467	2.37316	2.38166	2.39018	2.3987	2.40725	2.41581	2.42438	2.43296	2.44156	2.45017	2.4588	2.46744	2.47609	2.48476	2.49344	2.50213	2.51083	2.51955	2.52828	2.53702	2.54577	2.55454	2.56331
	0.030303	2.2122	2.22057	2.22896	2.23737	2.2458	2.25424	2.2627	2.27118	2.27968	2.2882	2.29674	2.30529	2.31386	2.32245	2.33105	2.33967	2.34831	2.35696	2.36563	2.37432	2.38302	2.39174	2.40048	2.40923	2.41799	2.42677	2.43557	2.44438	2.45321	2.46205	2.4709	2.47977	2.48866	2.49755	2.50647	2.51539	2.52433	2.53329	2.54225	2.55123	2.56023	2.56923	2.57825	2.58729	2.59633	2.60539	2.61446	2.62354
	0.0313131	2.25861	2.26726	2.27593	2.28462	2.29333	2.30205	2.3108	2.31957	2.32835	2.33716	2.34598	2.35482	2.36367	2.37255	2.38144	2.39035	2.39928	2.40823	2.41719	2.42617	2.43516	2.44418	2.4532	2.46225	2.47131	2.48038	2.48948	2.49858	2.50771	2.51684	2.526	2.53517	2.54435	2.55355	2.56276	2.57199	2.58123	2.59048	2.59975	2.60903	2.61833	2.62764	2.63696	2.6463	2.65565	2.66501	2.67439	2.68377
	0.0323232	2.305	2.31394	2.32289	2.33186	2.34085	2.34986	2.3589	2.36795	2.37702	2.38611	2.39522	2.40434	2.41349	2.42265	2.43184	2.44104	2.45025	2.45949	2.46874	2.47802	2.4873	2.49661	2.50593	2.51527	2.52462	2.534	2.54338	2.55279	2.56221	2.57164	2.58109	2.59056	2.60004	2.60954	2.61905	2.62858	2.63812	2.64768	2.65725	2.66683	2.67643	2.68605	2.69567	2.70531	2.71497	2.72464	2.73432	2.74401
	0.0333333	2.3514	2.36061	2.36985	2.3791	2.38838	2.39767	2.40699	2.41632	2.42568	2.43506	2.44445	2.45387	2.4633	2.47275	2.48223	2.49172	2.50123	2.51075	2.5203	2.52986	2.53944	2.54904	2.55866	2.56829	2.57794	2.58761	2.59729	2.60699	2.61671	2.62644	2.63619	2.64596	2.65574	2.66554	2.67535	2.68518	2.69502	2.70488	2.71475	2.72464	2.73454	2.74446	2.75439	2.76433	2.77429	2.78426	2.79425	2.80425
	0.0343434	2.39779	2.40728	2.4168	2.42634	2.4359	2.44548	2.45508	2.4647	2.47434	2.484	2.49369	2.50339	2.51311	2.52285	2.53262	2.5424	2.5522	2.56201	2.57185	2.58171	2.59158	2.60147	2.61138	2.62131	2.63126	2.64122	2.6512	2.6612	2.67121	2.68124	2.69129	2.70136	2.71144	2.72153	2.73165	2.74177	2.75192	2.76208	2.77225	2.78244	2.79265	2.80287	2.8131	2.82335	2.83362	2.8439	2.85419	2.8645
	0.0353535	2.44418	2.45395	2.46375	2.47357	2.48341	2.49328	2.50316	2.51307	2.523	2.53295	2.54292	2.55291	2.56292	2.57295	2.583	2.59307	2.60316	2.61327	2.6234	2.63355	2.64372	2.6539	2.66411	2.67433	2.68457	2.69483	2.70511	2.7154	2.72572	2.73604	2.74639	2.75675	2.76713	2.77753	2.78794	2.79837	2.80882	2.81928	2.82976	2.84025	2.85076	2.86128	2.87182	2.88238	2.89295	2.90353	2.91413	2.92474
	0.0363636	2.49056	2.50062	2.5107	2.5208	2.53093	2.54107	2.55125	2.56144	2.57165	2.58189	2.59215	2.60243	2.61272	2.62305	2.63339	2.64375	2.65413	2.66453	2.67495	2.68539	2.69586	2.70633	2.71683	2.72735	2.73789	2.74844	2.75902	2.76961	2.78022	2.79085	2.80149	2.81215	2.82283	2.83353	2.84424	2.85497	2.86572	2.87649	2.88727	2.89806	2.90888	2.9197	2.93055	2.94141	2.95228	2.96317	2.97408	2.985
	0.0373737	2.53694	2.54728	2.55764	2.56803	2.57844	2.58887	2.59933	2.6098	2.6203	2.63083	2.64137	2.65194	2.66253	2.67314	2.68377	2.69442	2.70509	2.71579	2.7265	2.73724	2.74799	2.75876	2.76956	2.78037	2.7912	2.80205	2.81293	2.82381	2.83472	2.84565	2.85659	2.86755	2.87853	2.88953	2.90055	2.91158	2.92263	2.93369	2.94478	2.95588	2.96699	2.97812	2.98927	3.00044	3.01162	3.02281	3.03403	3.04525
	0.0383838	2.58331	2.59393	2.60458	2.61525	2.62594	2.63666	2.6474	2.65817	2.66895	2.67976	2.6906	2.70145	2.71233	2.72323	2.73415	2.74509	2.75606	2.76704	2.77805	2.78908	2.80013	2.81119	2.82228	2.83339	2.84452	2.85567	2.86683	2.87802	2.88923	2.90045	2.91169	2.92295	2.93423	2.94553	2.95685	2.96818	2.97953	2.9909	3.00229	3.01369	3.02511	3.03655	3.048	3.05947	3.07096	3.08246	3.09398	3.10551
	0.0393939	2.62968	2.64059	2.65152	2.66247	2.67345	2.68445	2.69548	2.70653	2.7176	2.7287	2.73982	2.75096	2.76213	2.77332	2.78453	2.79576	2.80702	2.8183	2.8296	2.84092	2.85226	2.86362	2.875	2.88641	2.89783	2.90928	2.92074	2.93223	2.94373	2.95525	2.9668	2.97836	2.98994	3.00154	3.01315	3.02479	3.03644	3.04811	3.0598	3.07151	3.08323	3.09498	3.10673	3.11851	3.1303	3.14211	3.15394	3.16578
	0.040404	2.67605	2.68724	2.69845	2.70968	2.72095	2.73223	2.74355	2.75488	2.76624	2.77763	2.78904	2.80047	2.81193	2.82341	2.83491	2.84643	2.85798	2.86955	2.88114	2.89276	2.90439	2.91605	2.92773	2.93943	2.95115	2.96289	2.97465	2.98643	2.99823	3.01006	3.0219	3.03376	3.04564	3.05754	3.06946	3.0814	3.09335	3.10533	3.11732	3.12933	3.14136	3.1534	3.16547	3.17755	3.18965	3.20176	3.2139	3.22604
	0.0414141	2.72242	2.73388	2.74538	2.7569	2.76844	2.78002	2.79161	2.80324	2.81488	2.82656	2.83825	2.84998	2.86172	2.87349	2.88528	2.8971	2.90894	2.9208	2.93269	2.94459	2.95652	2.96848	2.98045	2.99244	3.00446	3.0165	3.02856	3.04064	3.05274	3.06486	3.077	3.08916	3.10134	3.11355	3.12577	3.13801	3.15026	3.16254	3.17484	3.18715	3.19949	3.21184	3.22421	3.23659	3.249	3.26142	3.27386	3.28632
	0.0424242	2.76878	2.78053	2.7923	2.80411	2.81594	2.82779	2.83968	2.85159	2.86352	2.87548	2.88747	2.89948	2.91151	2.92357	2.93566	2.94776	2.9599	2.97205	2.98423	2.99643	3.00865	3.0209	3.03317	3.04546	3.05778	3.07011	3.08247	3.09485	3.10725	3.11967	3.13211	3.14457	3.15705	3.16955	3.18207	3.19462	3.20718	3.21976	3.23236	3.24498	3.25762	3.27027	3.28295	3.29564	3.30835	3.32108	3.33383	3.34659
	0.0434343	2.81513	2.82716	2.83922	2.85131	2.86343	2.87557	2.88774	2.89994	2.91216	2.92441	2.93668	2.94898	2.9613	2.97365	2.98603	2.99843	3.01085	3.0233	3.03577	3.04827	3.06078	3.07333	3.08589	3.09848	3.11109	3.12372	3.13638	3.14905	3.16175	3.17447	3.18721	3.19997	3.21276	3.22556	3.23838	3.25123	3.26409	3.27698	3.28988	3.3028	3.31575	3.32871	3.34169	3.35469	3.36771	3.38074	3.3938	3.40687
	0.0444444	2.86148	2.8738	2.88614	2.89851	2.91092	2.92334	2.9358	2.94828	2.96079	2.97333	2.98589	2.99848	3.01109	3.02373	3.0364	3.04909	3.06181	3.07455	3.08731	3.1001	3.11291	3.12575	3.13861	3.1515	3.1644	3.17733	3.19028	3.20326	3.21626	3.22928	3.24232	3.25538	3.26846	3.28157	3.2947	3.30784	3.32101	3.3342	3.34741	3.36063	3.37388	3.38715	3.40044	3.41374	3.42707	3.44041	3.45377	3.46715
	0.0454545	2.90783	2.92043	2.93306	2.94571	2.9584	2.97111	2.98385	2.99662	3.00942	3.02224	3.0351	3.04797	3.06088	3.07381	3.08677	3.09975	3.11276	3.12579	3.13885	3.15193	3.16504	3.17817	3.19133	3.20451	3.21772	3.23094	3.24419	3.25747	3.27076	3.28408	3.29742	3.31079	3.32417	3.33758	3.35101	3.36446	3.37793	3.39142	3.40493	3.41847	3.43202	3.44559	3.45919	3.4728	3.48643	3.50008	3.51375	3.52744
	0.0464646	2.95418	2.96706	2.97997	2.99291	3.00588	3.01888	3.03191	3.04496	3.05805	3.07116	3.0843	3.09747	3.11066	3.12388	3.13713	3.15041	3.16371	3.17704	3.19039	3.20377	3.21717	3.2306	3.24405	3.25753	3.27103	3.28455	3.2981	3.31168	3.32527	3.33889	3.35253	3.3662	3.37988	3.39359	3.40732	3.42108	3.43485	3.44865	3.46246	3.4763	3.49016	3.50404	3.51794	3.53186	3.5458	3.55976	3.57373	3.58773
	0.0474747	3.00052	3.01368	3.02688	3.0401	3.05336	3.06664	3.07996	3.0933	3.10667	3.12007	3.1335	3.14696	3.16044	3.17396	3.1875	3.20106	3.21466	3.22828	3.24192	3.2556	3.26929	3.28302	3.29677	3.31054	3.32434	3.33816	3.35201	3.36588	3.37978	3.3937	3.40764	3.42161	3.43559	3.44961	3.46364	3.4777	3.49177	3.50587	3.51999	3.53414	3.5483	3.56249	3.57669	3.59092	3.60517	3.61943	3.63372	3.64803
	0.0484848	3.04685	3.0603	3.07378	3.08729	3.10083	3.1144	3.128	3.14163	3.15529	3.16898	3.1827	3.19645	3.21022	3.22403	3.23786	3.25172	3.26561	3.27952	3.29346	3.30743	3.32142	3.33544	3.34949	3.36356	3.37765	3.39177	3.40592	3.42009	3.43429	3.44851	3.46275	3.47702	3.49131	3.50562	3.51996	3.53432	3.5487	3.5631	3.57753	3.59198	3.60645	3.62094	3.63545	3.64998	3.66454	3.67911	3.69371	3.70833
	0.0494949	3.09319	3.10692	3.12068	3.13448	3.1483	3.16216	3.17605	3.18996	3.20391	3.21789	3.2319	3.24594	3.26	3.2741	3.28822	3.30237	3.31655	3.33076	3.34499	3.35926	3.37354	3.38786	3.4022	3.41657	3.43096	3.44538	3.45983	3.4743	3.48879	3.50331	3.51786	3.53243	3.54702	3.56164	3.57628	3.59094	3.60562	3.62033	3.63506	3.64982	3.66459	3.67939	3.69421	3.70905	3.72392	3.7388	3.7537	3.76863
	0.0505051	3.13952	3.15353	3.16758	3.18166	3.19577	3.20991	3.22409	3.23829	3.25253	3.2668	3.28109	3.29542	3.30978	3.32416	3.33858	3.35302	3.3675	3.382	3.39653	3.41108	3.42567	3.44028	3.45492	3.46958	3.48428	3.49899	3.51374	3.52851	3.5433	3.55812	3.57297	3.58784	3.60273	3.61765	3.6326	3.64756	3.66255	3.67757	3.6926	3.70766	3.72274	3.73785	3.75298	3.76812	3.7833	3.79849	3.8137	3.82894
	0.0515152	3.18584	3.20014	3.21447	3.22884	3.24323	3.25766	3.27212	3.28662	3.30114	3.3157	3.33028	3.3449	3.35955	3.37423	3.38894	3.40367	3.41844	3.43323	3.44806	3.46291	3.47779	3.4927	3.50763	3.5226	3.53759	3.5526	3.56765	3.58272	3.59781	3.61293	3.62808	3.64325	3.65845	3.67367	3.68892	3.70419	3.71948	3.7348	3.75014	3.76551	3.7809	3.79631	3.81174	3.8272	3.84268	3.85818	3.8737	3.88925
	0.0525253	3.23216	3.24674	3.26136	3.27601	3.29069	3.30541	3.32016	3.33494	3.34975	3.3646	3.37947	3.39438	3.40932	3.42429	3.43929	3.45432	3.46938	3.48447	3.49959	3.51474	3.52991	3.54512	3.56035	3.57561	3.5909	3.60621	3.62156	3.63693	3.65232	3.66774	3.68319	3.69867	3.71417	3.72969	3.74524	3.76082	3.77641	3.79204	3.80769	3.82336	3.83905	3.85477	3.87051	3.88628	3.90206	3.91787	3.93371	3.94956
	0.0535354	3.27848	3.29335	3.30825	3.32318	3.33815	3.35315	3.36819	3.38326	3.39836	3.41349	3.42866	3.44386	3.45909	3.47435	3.48964	3.50497	3.52032	3.5357	3.55112	3.56656	3.58203	3.59753	3.61306	3.62862	3.64421	3.65982	3.67547	3.69113	3.70683	3.72255	3.7383	3.75408	3.76988	3.78571	3.80157	3.81744	3.83335	3.84928	3.86523	3.88121	3.89721	3.91324	3.92929	3.94536	3.96145	3.97757	3.99371	4.00988
	0.0545455	3.32479	3.33994	3.35513	3.37035	3.3856	3.40089	3.41622	3.43157	3.44697	3.46239	3.47785	3.49334	3.50886	3.52441	3.54	3.55561	3.57126	3.58694	3.60265	3.61838	3.63415	3.64995	3.66578	3.68163	3.69752	3.71343	3.72937	3.74534	3.76134	3.77737	3.79342	3.8095	3.8256	3.84173	3.85789	3.87407	3.89028	3.90652	3.92278	3.93906	3.95537	3.9717	3.98806	4.00444	4.02085	4.03727	4.05373	4.0702
	0.0555556	3.3711	3.38654	3.40201	3.41751	3.43306	3.44863	3.46424	3.47989	3.49557	3.51128	3.52703	3.54281	3.55862	3.57447	3.59034	3.60625	3.6222	3.63817	3.65417	3.67021	3.68627	3.70237	3.71849	3.73465	3.75083	3.76704	3.78328	3.79955	3.81585	3.83218	3.84853	3.86491	3.88132	3.89776	3.91422	3.93071	3.94722	3.96376	3.98033	3.99692	4.01353	4.03017	4.04684	4.06353	4.08024	4.09698	4.11374	4.13053
	0.0565657	3.41741	3.43313	3.44888	3.46468	3.4805	3.49637	3.51226	3.5282	3.54417	3.56017	3.57621	3.59228	3.60838	3.62452	3.64069	3.6569	3.67313	3.6894	3.7057	3.72203	3.73839	3.75478	3.7712	3.78766	3.80414	3.82065	3.83719	3.85376	3.87036	3.88699	3.90365	3.92033	3.93704	3.95378	3.97055	3.98734	4.00416	4.02101	4.03788	4.05478	4.0717	4.08865	4.10562	4.12262	4.13964	4.15669	4.17376	4.19086
	0.0575758	3.46371	3.47972	3.49576	3.51183	3.52795	3.5441	3.56028	3.57651	3.59276	3.60906	3.62539	3.64175	3.65814	3.67457	3.69104	3.70753	3.72406	3.74063	3.75722	3.77385	3.79051	3.8072	3.82392	3.84067	3.85745	3.87426	3.8911	3.90797	3.92487	3.9418	3.95876	3.97575	3.99276	4.00981	4.02688	4.04398	4.0611	4.07825	4.09543	4.11264	4.12987	4.14712	4.1644	4.18171	4.19904	4.2164	4.23378	4.25119
	0.0585859	3.51001	3.5263	3.54262	3.55899	3.57539	3.59183	3.6083	3.62481	3.64136	3.65794	3.67456	3.69121	3.7079	3.72462	3.74138	3.75817	3.775	3.79185	3.80874	3.82567	3.84262	3.85961	3.87663	3.89368	3.91076	3.92787	3.94501	3.96218	3.97939	3.99662	4.01388	4.03117	4.04849	4.06583	4.08321	4.10061	4.11804	4.1355	4.15299	4.1705	4.18804	4.2056	4.22319	4.24081	4.25845	4.27612	4.29381	4.31153
	0.059596	3.55631	3.57288	3.58949	3.60614	3.62283	3.63955	3.65631	3.67311	3.68995	3.70682	3.72373	3.74068	3.75766	3.77467	3.79172	3.80881	3.82593	3.84308	3.86027	3.87749	3.89474	3.91202	3.92934	3.94669	3.96407	3.98148	3.99892	4.0164	4.0339	4.05143	4.069	4.08659	4.10421	4.12186	4.13954	4.15725	4.17499	4.19275	4.21054	4.22836	4.24621	4.26408	4.28198	4.29991	4.31786	4.33584	4.35384	4.37187
	0.0606061	3.6026	3.61945	3.63635	3.65329	3.67026	3.68727	3.70432	3.72141	3.73854	3.7557	3.7729	3.79014	3.80741	3.82472	3.84206	3.85944	3.87686	3.8943	3.91179	3.9293	3.94685	3.96443	3.98205	3.9997	4.01738	4.03509	4.05283	4.07061	4.08841	4.10625	4.12411	4.14201	4.15994	4.17789	4.19588	4.21389	4.23193	4.25001	4.2681	4.28623	4.30439	4.32257	4.34078	4.35901	4.37727	4.39556	4.41387	4.43221
	0.0616162	3.64888	3.66603	3.68321	3.70043	3.71769	3.73499	3.75233	3.76971	3.78712	3.80458	3.82207	3.8396	3.85716	3.87476	3.8924	3.91008	3.92778	3.94553	3.96331	3.98112	3.99896	4.01685	4.03476	4.05271	4.07069	4.0887	4.10674	4.12482	4.14292	4.16106	4.17923	4.19743	4.21566	4.23392	4.25221	4.27053	4.28888	4.30726	4.32567	4.3441	4.36256	4.38105	4.39957	4.41812	4.43669	4.45529	4.47391	4.49256
	0.0626263	3.69517	3.71259	3.73006	3.74757	3.76512	3.78271	3.80033	3.818	3.83571	3.85345	3.87123	3.88906	3.90691	3.92481	3.94274	3.96071	3.97871	3.99675	4.01482	4.03293	4.05108	4.06926	4.08747	4.10571	4.12399	4.14231	4.16065	4.17903	4.19744	4.21588	4.23435	4.25286	4.27139	4.28996	4.30855	4.32718	4.34583	4.36452	4.38323	4.40197	4.42074	4.43954	4.45837	4.47723	4.49611	4.51502	4.53395	4.55292
	0.0636364	3.74145	3.75916	3.77691	3.79471	3.81254	3.83042	3.84834	3.86629	3.88429	3.90232	3.9204	3.93851	3.95666	3.97485	3.99307	4.01134	4.02963	4.04797	4.06634	4.08475	4.10319	4.12167	4.14018	4.15872	4.1773	4.19591	4.21456	4.23324	4.25195	4.2707	4.28947	4.30828	4.32712	4.34599	4.36489	4.38382	4.40278	4.42178	4.4408	4.45985	4.47893	4.49804	4.51717	4.53634	4.55553	4.57475	4.594	4.61327
	0.0646465	3.78772	3.80572	3.82376	3.84184	3.85996	3.87813	3.89633	3.91458	3.93287	3.95119	3.96956	3.98796	4.00641	4.02489	4.04341	4.06196	4.08056	4.09919	4.11786	4.13656	4.1553	4.17407	4.19288	4.21173	4.23061	4.24952	4.26847	4.28745	4.30647	4.32551	4.34459	4.3637	4.38285	4.40202	4.42123	4.44047	4.45974	4.47904	4.49837	4.51772	4.53711	4.55653	4.57598	4.59545	4.61496	4.63449	4.65405	4.67363
	0.0656566	3.83399	3.85228	3.8706	3.88897	3.90738	3.92583	3.94433	3.96286	3.98144	4.00006	4.01872	4.03741	4.05615	4.07492	4.09374	4.11259	4.13148	4.15041	4.16937	4.18837	4.20741	4.22648	4.24559	4.26474	4.28392	4.30313	4.32238	4.34166	4.36098	4.38033	4.39971	4.41913	4.43858	4.45806	4.47757	4.49712	4.51669	4.5363	4.55594	4.5756	4.5953	4.61503	4.63478	4.65457	4.67439	4.69423	4.7141	4.734
	0.0666667	3.88026	3.89883	3.91744	3.9361	3.9548	3.97354	3.99232	4.01115	4.03001	4.04892	4.06787	4.08686	4.10589	4.12496	4.14407	4.16321	4.1824	4.20162	4.22088	4.24018	4.25952	4.27889	4.2983	4.31774	4.33722	4.35674	4.37629	4.39588	4.4155	4.43515	4.45484	4.47456	4.49431	4.5141	4.53392	4.55377	4.57365	4.59356	4.61351	4.63349	4.65349	4.67353	4.6936	4.71369	4.73382	4.75397	4.77416	4.79437
	0.0676768	3.92653	3.94538	3.96428	3.98322	4.00221	4.02124	4.04031	4.05943	4.07858	4.09778	4.11702	4.13631	4.15563	4.17499	4.19439	4.21383	4.23332	4.25284	4.27239	4.29199	4.31162	4.3313	4.351	4.37075	4.39053	4.41035	4.4302	4.45009	4.47001	4.48997	4.50996	4.52999	4.55004	4.57014	4.59026	4.61042	4.63061	4.65083	4.67108	4.69137	4.71169	4.73203	4.75241	4.77282	4.79325	4.81372	4.83422	4.85474
	0.0686869	3.97279	3.99193	4.01111	4.03034	4.04962	4.06893	4.0883	4.1077	4.12715	4.14664	4.16617	4.18575	4.20536	4.22502	4.24472	4.26446	4.28423	4.30405	4.3239	4.3438	4.36373	4.3837	4.40371	4.42376	4.44384	4.46396	4.48411	4.5043	4.52453	4.54479	4.56508	4.58541	4.60578	4.62618	4.64661	4.66707	4.68757	4.7081	4.72866	4.74926	4.76988	4.79054	4.81123	4.83194	4.85269	4.87347	4.89428	4.91512
	0.069697	4.01904	4.03847	4.05794	4.07746	4.09702	4.11663	4.13628	4.15597	4.17571	4.1955	4.21532	4.23519	4.2551	4.27505	4.29504	4.31507	4.33515	4.35526	4.37541	4.39561	4.41584	4.43611	4.45641	4.47676	4.49714	4.51756	4.53802	4.55851	4.57904	4.59961	4.62021	4.64084	4.66151	4.68222	4.70296	4.72373	4.74453	4.76537	4.78624	4.80714	4.82808	4.84905	4.87005	4.89107	4.91213	4.93323	4.95435	4.9755
	0.0707071	4.0653	4.08501	4.10477	4.12457	4.14442	4.16432	4.18426	4.20424	4.22428	4.24435	4.26447	4.28463	4.30483	4.32508	4.34536	4.36569	4.38606	4.40647	4.42692	4.44741	4.46794	4.48851	4.50912	4.52977	4.55045	4.57117	4.59193	4.61273	4.63356	4.65443	4.67533	4.69627	4.71725	4.73826	4.7593	4.78038	4.8015	4.82264	4.84382	4.86504	4.88628	4.90756	4.92887	4.95021	4.97158	4.99298	5.01442	5.03588
	0.0717172	4.11154	4.13154	4.15159	4.17168	4.19182	4.212	4.23224	4.25251	4.27283	4.2932	4.31361	4.33406	4.35456	4.3751	4.39568	4.41631	4.43697	4.45768	4.47843	4.49922	4.52005	4.54091	4.56182	4.58277	4.60376	4.62478	4.64584	4.66694	4.68808	4.70925	4.73046	4.75171	4.77299	4.7943	4.81566	4.83704	4.85846	4.87992	4.90141	4.92293	4.94448	4.96607	4.98769	5.00935	5.03103	5.05275	5.07449	5.09627
	0.0727273	4.15779	4.17807	4.19841	4.21879	4.23921	4.25969	4.28021	4.30078	4.32139	4.34205	4.36275	4.3835	4.40429	4.42512	4.446	4.46692	4.48788	4.50889	4.52993	4.55102	4.57215	4.59332	4.61453	4.63577	4.65706	4.67839	4.69975	4.72115	4.74259	4.76407	4.78559	4.80714	4.82872	4.85035	4.87201	4.8937	4.91543	4.9372	4.95899	4.98083	5.00269	5.02459	5.04652	5.06849	5.09048	5.11251	5.13457	5.15666
	0.0737374	4.20403	4.2246	4.24522	4.26589	4.28661	4.30737	4.32818	4.34904	4.36994	4.39089	4.41189	4.43293	4.45401	4.47514	4.49632	4.51753	4.53879	4.56009	4.58144	4.60282	4.62425	4.64572	4.66723	4.68878	4.71037	4.73199	4.75366	4.77537	4.79711	4.81889	4.84071	4.86257	4.88446	4.90639	4.92836	4.95036	4.9724	4.99447	5.01658	5.03872	5.0609	5.08311	5.10535	5.12763	5.14994	5.17228	5.19465	5.21706
	0.0747475	4.25027	4.27113	4.29203	4.31299	4.33399	4.35505	4.37615	4.3973	4.41849	4.43974	4.46102	4.48236	4.50374	4.52516	4.54663	4.56814	4.5897	4.6113	4.63294	4.65463	4.67635	4.69812	4.71993	4.74178	4.76367	4.7856	4.80757	4.82958	4.85163	4.87372	4.89584	4.918	4.9402	4.96244	4.98472	5.00703	5.02937	5.05175	5.07417	5.09662	5.11911	5.14163	5.16419	5.18677	5.2094	5.23205	5.25474	5.27746
	0.0757576	4.2965	4.31765	4.33884	4.36008	4.38138	4.40272	4.42411	4.44555	4.46704	4.48858	4.51016	4.53178	4.55346	4.57518	4.59694	4.61875	4.64061	4.6625	4.68444	4.70643	4.72845	4.75052	4.77263	4.79478	4.81698	4.83921	4.86148	4.8838	4.90615	4.92854	4.95097	4.97344	4.99595	5.01849	5.04107	5.06369	5.08635	5.10904	5.13176	5.15453	5.17732	5.20016	5.22302	5.24592	5.26886	5.29183	5.31483	5.33786
	0.0767677	4.34273	4.36416	4.38564	4.40718	4.42876	4.45039	4.47208	4.49381	4.51559	4.53741	4.55929	4.58121	4.60318	4.62519	4.64725	4.66936	4.69151	4.7137	4.73594	4.75823	4.78055	4.80292	4.82533	4.84779	4.87028	4.89282	4.91539	4.93801	4.96067	4.98336	5.0061	5.02888	5.05169	5.07454	5.09743	5.12036	5.14332	5.16632	5.18936	5.21243	5.23554	5.25868	5.28186	5.30508	5.32832	5.35161	5.37492	5.39827
	0.0777778	4.38896	4.41068	4.43245	4.45427	4.47614	4.49806	4.52003	4.54206	4.56413	4.58625	4.60842	4.63063	4.65289	4.6752	4.69756	4.71996	4.74241	4.7649	4.78744	4.81002	4.83265	4.85532	4.87803	4.90079	4.92358	4.94642	4.9693	4.99222	5.01519	5.03819	5.06123	5.08431	5.10743	5.13059	5.15379	5.17703	5.2003	5.22361	5.24696	5.27034	5.29376	5.31722	5.34071	5.36423	5.38779	5.41139	5.43502	5.45868
	0.0787879	4.43518	4.45718	4.47924	4.50135	4.52351	4.54573	4.56799	4.5903	4.61267	4.63508	4.65754	4.68005	4.70261	4.72522	4.74787	4.77057	4.79331	4.8161	4.83894	4.86182	4.88475	4.90772	4.93073	4.95379	4.97689	5.00003	5.02321	5.04644	5.06971	5.09301	5.11636	5.13975	5.16318	5.18664	5.21015	5.2337	5.25728	5.2809	5.30456	5.32825	5.35198	5.37575	5.39955	5.42339	5.44726	5.47117	5.49512	5.51909
	0.079798	4.4814	4.50369	4.52604	4.54843	4.57089	4.59339	4.61594	4.63855	4.6612	4.68391	4.70667	4.72947	4.75232	4.77522	4.79817	4.82117	4.84421	4.8673	4.89044	4.91362	4.93684	4.96012	4.98343	5.00679	5.03019	5.05364	5.07712	5.10065	5.12423	5.14784	5.17149	5.19519	5.21892	5.2427	5.26651	5.29037	5.31426	5.33819	5.36216	5.38616	5.4102	5.43428	5.4584	5.48255	5.50674	5.53096	5.55522	5.57951
	0.0808081	4.52761	4.55019	4.57283	4.59551	4.61825	4.64105	4.66389	4.68679	4.70974	4.73274	4.75579	4.77888	4.80203	4.82523	4.84848	4.87177	4.89511	4.9185	4.94193	4.96541	4.98894	5.01251	5.03613	5.05979	5.08349	5.10724	5.13104	5.15487	5.17875	5.20267	5.22663	5.25063	5.27467	5.29875	5.32288	5.34704	5.37124	5.39548	5.41976	5.44408	5.46843	5.49282	5.51725	5.54172	5.56622	5.59076	5.61533	5.63994
	0.0818182	4.57382	4.59669	4.61961	4.64259	4.66562	4.6887	4.71184	4.73503	4.75827	4.78156	4.8049	4.8283	4.85174	4.87523	4.89878	4.92237	4.94601	4.96969	4.99343	5.01721	5.04103	5.06491	5.08883	5.11279	5.1368	5.16085	5.18495	5.20909	5.23327	5.25749	5.28176	5.30607	5.33042	5.35481	5.37924	5.40371	5.42823	5.45278	5.47737	5.50199	5.52666	5.55136	5.57611	5.60089	5.6257	5.65055	5.67544	5.70036
	0.0828283	4.62003	4.64318	4.6664	4.68966	4.71298	4.73636	4.75978	4.78326	4.8068	4.83038	4.85402	4.87771	4.90145	4.92524	4.94908	4.97296	4.9969	5.02089	5.04492	5.069	5.09313	5.1173	5.14152	5.16579	5.1901	5.21446	5.23886	5.2633	5.28779	5.31232	5.33689	5.36151	5.38617	5.41087	5.43561	5.46039	5.48521	5.51007	5.53497	5.55991	5.58489	5.60991	5.63496	5.66006	5.68519	5.71035	5.73556	5.7608
	0.0838384	4.66623	4.68968	4.71317	4.73673	4.76034	4.784	4.80772	4.8315	4.85532	4.8792	4.90313	4.92712	4.95115	4.97524	4.99937	5.02356	5.04779	5.07208	5.09641	5.12079	5.14522	5.1697	5.19422	5.21879	5.2434	5.26806	5.29277	5.31752	5.34231	5.36715	5.39203	5.41695	5.44192	5.46693	5.49198	5.51707	5.5422	5.56737	5.59258	5.61784	5.64313	5.66846	5.69382	5.71923	5.74468	5.77016	5.79568	5.82123
	0.0848485	4.71243	4.73616	4.75995	4.78379	4.80769	4.83165	4.85566	4.87973	4.90385	4.92802	4.95224	4.97652	5.00085	5.02524	5.04967	5.07415	5.09869	5.12327	5.1479	5.17258	5.19731	5.22209	5.24692	5.27179	5.2967	5.32167	5.34668	5.37173	5.39683	5.42198	5.44716	5.4724	5.49767	5.52299	5.54835	5.57375	5.59919	5.62467	5.6502	5.67576	5.70136	5.72701	5.75269	5.77841	5.80417	5.82996	5.8558	5.88167
	0.0858586	4.75863	4.78265	4.80672	4.83086	4.85505	4.87929	4.9036	4.92795	4.95237	4.97683	5.00135	5.02593	5.05055	5.07523	5.09996	5.12474	5.14958	5.17446	5.19939	5.22437	5.2494	5.27448	5.29961	5.32479	5.35001	5.37528	5.40059	5.42595	5.45136	5.47681	5.5023	5.52784	5.55342	5.57905	5.60472	5.63043	5.65618	5.68197	5.70781	5.73369	5.7596	5.78556	5.81155	5.83759	5.86366	5.88977	5.91592	5.94211
	0.0868687	4.80482	4.82913	4.85349	4.87791	4.9024	4.92693	4.95153	4.97618	5.00088	5.02564	5.05046	5.07533	5.10025	5.12523	5.15025	5.17533	5.20046	5.22565	5.25088	5.27616	5.30149	5.32688	5.3523	5.37778	5.40331	5.42888	5.4545	5.48017	5.50588	5.53164	5.55744	5.58329	5.60918	5.63511	5.66109	5.68711	5.71317	5.73928	5.76543	5.79162	5.81784	5.84411	5.87042	5.89677	5.92316	5.94959	5.97605	6.00256
	0.0878788	4.85101	4.8756	4.90026	4.92497	4.94974	4.97457	4.99946	5.0244	5.0494	5.07445	5.09956	5.12473	5.14995	5.17522	5.20054	5.22592	5.25135	5.27683	5.30237	5.32795	5.35358	5.37927	5.405	5.43078	5.45661	5.48249	5.50841	5.53438	5.5604	5.58647	5.61258	5.63873	5.66493	5.69118	5.71746	5.74379	5.77017	5.79659	5.82305	5.84955	5.87609	5.90267	5.9293	5.95596	5.98266	6.00941	6.03619	6.06301
	0.0888889	4.89719	4.92207	4.94702	4.97202	4.99708	5.0222	5.04738	5.07262	5.09791	5.12326	5.14866	5.17412	5.19964	5.22521	5.25083	5.27651	5.30224	5.32802	5.35385	5.37974	5.40567	5.43166	5.45769	5.48378	5.50991	5.53609	5.56232	5.5886	5.61493	5.6413	5.66772	5.69418	5.72069	5.74724	5.77384	5.80048	5.82717	5.85389	5.88067	5.90748	5.93434	5.96123	5.98817	6.01515	6.04217	6.06923	6.09633	6.12346
	0.089899	4.94337	4.96854	4.99378	5.01907	5.04442	5.06983	5.0953	5.12083	5.14642	5.17206	5.19776	5.22352	5.24933	5.2752	5.30112	5.32709	5.35312	5.3792	5.40534	5.43152	5.45776	5.48405	5.51038	5.53677	5.56321	5.5897	5.61623	5.64282	5.66945	5.69613	5.72285	5.74963	5.77644	5.80331	5.83022	5.85717	5.88417	5.91121	5.93829	5.96542	5.99259	6.0198	6.04705	6.07434	6.10168	6.12905	6.15647	6.18392
	0.0909091	4.98955	5.01501	5.04053	5.06611	5.09176	5.11746	5.14322	5.16905	5.19493	5.22086	5.24686	5.27291	5.29902	5.32518	5.3514	5.37768	5.404	5.43038	5.45682	5.48331	5.50984	5.53644	5.56308	5.58977	5.61651	5.6433	5.67015	5.69704	5.72397	5.75096	5.77799	5.80508	5.8322	5.85938	5.88659	5.91386	5.94117	5.96852	5.99591	6.02335	6.05084	6.07836	6.10593	6.13354	6.16119	6.18888	6.21661	6.24438
	0.0919192	5.03572	5.06147	5.08728	5.11316	5.13909	5.16509	5.19114	5.21726	5.24343	5.26966	5.29595	5.3223	5.34871	5.37517	5.40168	5.42826	5.45488	5.48157	5.5083	5.53509	5.56193	5.58882	5.61577	5.64277	5.66981	5.69691	5.72406	5.75125	5.7785	5.80579	5.83314	5.86052	5.88796	5.91544	5.94297	5.97055	5.99817	6.02583	6.05354	6.0813	6.10909	6.13693	6.16481	6.19274	6.2207	6.24871	6.27676	6.30485
	0.0929293	5.08189	5.10793	5.13403	5.16019	5.18642	5.21271	5.23905	5.26546	5.29193	5.31846	5.34505	5.37169	5.39839	5.42515	5.45197	5.47884	5.50576	5.53275	5.55978	5.58687	5.61401	5.64121	5.66846	5.69576	5.72311	5.75052	5.77797	5.80547	5.83302	5.86063	5.88828	5.91598	5.94372	5.97151	5.99935	6.02724	6.05517	6.08315	6.11117	6.13924	6.16735	6.1955	6.2237	6.25194	6.28022	6.30855	6.33691	6.36532
	0.0939394	5.12805	5.15438	5.18077	5.20723	5.23374	5.26032	5.28697	5.31367	5.34043	5.36725	5.39413	5.42108	5.44807	5.47513	5.50224	5.52941	5.55664	5.58392	5.61126	5.63865	5.6661	5.6936	5.72115	5.74875	5.77641	5.80412	5.83188	5.85969	5.88755	5.91546	5.94342	5.97143	5.99948	6.02759	6.05574	6.08393	6.11218	6.14047	6.1688	6.19718	6.22561	6.25408	6.28259	6.31115	6.33974	6.36839	6.39707	6.42579
	0.0949495	5.17421	5.20083	5.22751	5.25426	5.28107	5.30794	5.33487	5.36187	5.38893	5.41604	5.44322	5.47046	5.49775	5.52511	5.55252	5.57999	5.60752	5.6351	5.66274	5.69043	5.71818	5.74598	5.77384	5.80175	5.82971	5.85773	5.88579	5.91391	5.94208	5.97029	5.99856	6.02688	6.05525	6.08366	6.11212	6.14063	6.16919	6.19779	6.22644	6.25513	6.28387	6.31265	6.34148	6.37035	6.39927	6.42823	6.45723	6.48627
	0.0959596	5.22037	5.24728	5.27425	5.30129	5.32839	5.35555	5.38278	5.41007	5.43742	5.46483	5.49231	5.51984	5.54743	5.57509	5.6028	5.63057	5.65839	5.68628	5.71422	5.74221	5.77026	5.79837	5.82653	5.85474	5.88301	5.91133	5.9397	5.96813	5.9966	6.02513	6.05371	6.08233	6.11101	6.13973	6.16851	6.19733	6.2262	6.25511	6.28407	6.31308	6.34214	6.37123	6.40038	6.42957	6.4588	6.48807	6.51739	6.54675
	0.0969697	5.26653	5.29372	5.32098	5.34831	5.3757	5.40316	5.43068	5.45826	5.48591	5.51362	5.54139	5.56922	5.59711	5.62506	5.65307	5.68114	5.70926	5.73745	5.76569	5.79399	5.82234	5.85075	5.87922	5.90774	5.93631	5.96494	5.99361	6.02235	6.05113	6.07996	6.10885	6.13779	6.16677	6.19581	6.22489	6.25403	6.28321	6.31244	6.34171	6.37103	6.4004	6.42982	6.45928	6.48878	6.51833	6.54792	6.57756	6.60724
	0.0979798	5.31268	5.34016	5.36771	5.39533	5.42301	5.45076	5.47858	5.50646	5.5344	5.5624	5.59047	5.61859	5.64678	5.67503	5.70334	5.73171	5.76014	5.78862	5.81717	5.84577	5.87442	5.90314	5.93191	5.96073	5.98961	6.01854	6.04753	6.07657	6.10566	6.1348	6.164	6.19324	6.22254	6.25189	6.28128	6.31073	6.34022	6.36976	6.39935	6.42899	6.45867	6.4884	6.51818	6.548	6.57786	6.60777	6.63773	6.66773
	0.0989899	5.35882	5.3866	5.41444	5.44235	5.47032	5.49837	5.52647	5.55465	5.58288	5.61118	5.63954	5.66797	5.69645	5.725	5.75361	5.78228	5.81101	5.83979	5.86864	5.89754	5.9265	5.95552	5.98459	6.01372	6.04291	6.07215	6.10144	6.13079	6.16018	6.18964	6.21914	6.2487	6.27831	6.30796	6.33767	6.36743	6.39724	6.42709	6.457	6.48695	6.51695	6.54699	6.57708	6.60722	6.6374	6.66763	6.6979	6.72822
	0.1	5.40496	5.43303	5.46116	5.48936	5.51763	5.54597	5.57437	5.60283	5.63136	5.65996	5.68862	5.71734	5.74612	5.77497	5.80388	5.83285	5.86187	5.89096	5.92011	5.94932	5.97858	6.0079	6.03728	6.06671	6.0962	6.12575	6.15535	6.185	6.21471	6.24447	6.27429	6.30416	6.33407	6.36404	6.39406	6.42413	6.45425	6.48442	6.51464	6.54491	6.57522	6.60558	6.63599	6.66644	6.69694	6.72749	6.75808	6.78872
[truncated: 52 more columns]

## Sheet: Fig4B
		Time between speciation and introgression
		0.01	0.019899	0.029798	0.039697	0.049596	0.0594949	0.0693939	0.0792929	0.0891919	0.0990909	0.10899	0.118889	0.128788	0.138687	0.148586	0.158485	0.168384	0.178283	0.188182	0.198081	0.20798	0.217879	0.227778	0.237677	0.247576	0.257475	0.267374	0.277273	0.287172	0.297071	0.30697	0.316869	0.326768	0.336667	0.346566	0.356465	0.366364	0.376263	0.386162	0.396061	0.40596	0.415859	0.425758	0.435657	0.445556	0.455455	0.465354	0.475253
Admixture proportion	0	0.818356	0.818356	0.818356	0.818356	0.818356	0.818356	0.818356	0.818356	0.818356	0.818356	0.818356	0.818356	0.818356	0.818356	0.818356	0.818356	0.818356	0.818356	0.818356	0.818356	0.818356	0.818356	0.818356	0.818356	0.818356	0.818356	0.818356	0.818356	0.818356	0.818356	0.818356	0.818356	0.818356	0.818356	0.818356	0.818356	0.818356	0.818356	0.818356	0.818356	0.818356	0.818356	0.818356	0.818356	0.818356	0.818356	0.818356	0.818356
	0.0010101	0.900734	0.901063	0.901392	0.901722	0.902051	0.902381	0.90271	0.90304	0.90337	0.9037	0.90403	0.904361	0.904691	0.905021	0.905352	0.905682	0.906013	0.906344	0.906675	0.907006	0.907337	0.907668	0.907999	0.908331	0.908662	0.908994	0.909325	0.909657	0.909989	0.910321	0.910653	0.910985	0.911317	0.911649	0.911982	0.912314	0.912646	0.912979	0.913312	0.913644	0.913977	0.91431	0.914643	0.914976	0.915309	0.915642	0.915975	0.916309
	0.0020202	0.983076	0.983735	0.984394	0.985053	0.985712	0.986372	0.987031	0.987691	0.988352	0.989012	0.989672	0.990333	0.990994	0.991655	0.992317	0.992978	0.99364	0.994302	0.994964	0.995626	0.996289	0.996952	0.997614	0.998277	0.998941	0.999604	1.00027	1.00093	1.0016	1.00226	1.00292	1.00359	1.00425	1.00492	1.00558	1.00625	1.00691	1.00758	1.00824	1.00891	1.00958	1.01024	1.01091	1.01157	1.01224	1.01291	1.01357	1.01424
	0.0030303	1.06538	1.06637	1.06736	1.06835	1.06934	1.07033	1.07132	1.07231	1.0733	1.07429	1.07528	1.07627	1.07727	1.07826	1.07925	1.08024	1.08124	1.08223	1.08322	1.08422	1.08521	1.08621	1.0872	1.0882	1.08919	1.09019	1.09118	1.09218	1.09318	1.09417	1.09517	1.09617	1.09716	1.09816	1.09916	1.10016	1.10116	1.10216	1.10315	1.10415	1.10515	1.10615	1.10715	1.10815	1.10915	1.11015	1.11115	1.11215
	0.0040404	1.14766	1.14897	1.15029	1.15161	1.15293	1.15425	1.15557	1.15689	1.15822	1.15954	1.16086	1.16218	1.16351	1.16483	1.16615	1.16748	1.1688	1.17013	1.17145	1.17278	1.17411	1.17543	1.17676	1.17809	1.17942	1.18074	1.18207	1.1834	1.18473	1.18606	1.18739	1.18872	1.19005	1.19138	1.19271	1.19404	1.19538	1.19671	1.19804	1.19937	1.20071	1.20204	1.20337	1.20471	1.20604	1.20738	1.20871	1.21005
	0.00505051	1.22989	1.23154	1.23319	1.23484	1.23649	1.23814	1.2398	1.24145	1.2431	1.24475	1.24641	1.24806	1.24972	1.25137	1.25303	1.25468	1.25634	1.258	1.25966	1.26131	1.26297	1.26463	1.26629	1.26795	1.26961	1.27127	1.27293	1.2746	1.27626	1.27792	1.27958	1.28125	1.28291	1.28458	1.28624	1.28791	1.28957	1.29124	1.29291	1.29457	1.29624	1.29791	1.29958	1.30124	1.30291	1.30458	1.30625	1.30792
	0.00606061	1.3121	1.31408	1.31606	1.31804	1.32002	1.322	1.32398	1.32597	1.32795	1.32994	1.33192	1.33391	1.33589	1.33788	1.33987	1.34186	1.34385	1.34584	1.34783	1.34982	1.35181	1.3538	1.35579	1.35779	1.35978	1.36177	1.36377	1.36577	1.36776	1.36976	1.37175	1.37375	1.37575	1.37775	1.37975	1.38175	1.38375	1.38575	1.38775	1.38975	1.39175	1.39375	1.39576	1.39776	1.39976	1.40177	1.40377	1.40578
	0.00707071	1.39426	1.39657	1.39889	1.4012	1.40351	1.40582	1.40814	1.41045	1.41277	1.41509	1.4174	1.41972	1.42204	1.42436	1.42668	1.429	1.43132	1.43365	1.43597	1.43829	1.44062	1.44294	1.44527	1.4476	1.44992	1.45225	1.45458	1.45691	1.45924	1.46157	1.4639	1.46623	1.46856	1.47089	1.47323	1.47556	1.4779	1.48023	1.48257	1.4849	1.48724	1.48958	1.49191	1.49425	1.49659	1.49893	1.50127	1.50361
	0.00808081	1.4764	1.47904	1.48168	1.48433	1.48697	1.48962	1.49226	1.49491	1.49756	1.50021	1.50286	1.50551	1.50816	1.51081	1.51346	1.51612	1.51877	1.52143	1.52408	1.52674	1.5294	1.53206	1.53472	1.53738	1.54004	1.5427	1.54536	1.54802	1.55069	1.55335	1.55602	1.55868	1.56135	1.56402	1.56668	1.56935	1.57202	1.57469	1.57736	1.58003	1.58271	1.58538	1.58805	1.59073	1.5934	1.59608	1.59875	1.60143
	0.00909091	1.55849	1.56147	1.56444	1.56742	1.57039	1.57337	1.57635	1.57933	1.58231	1.58529	1.58827	1.59126	1.59424	1.59723	1.60021	1.6032	1.60619	1.60918	1.61217	1.61516	1.61815	1.62114	1.62413	1.62713	1.63012	1.63312	1.63612	1.63911	1.64211	1.64511	1.64811	1.65111	1.65411	1.65711	1.66012	1.66312	1.66613	1.66913	1.67214	1.67514	1.67815	1.68116	1.68417	1.68718	1.69019	1.6932	1.69621	1.69922
	0.010101	1.64056	1.64386	1.64717	1.65048	1.65379	1.6571	1.66041	1.66372	1.66703	1.67035	1.67366	1.67698	1.6803	1.68361	1.68693	1.69025	1.69358	1.6969	1.70022	1.70355	1.70687	1.7102	1.71353	1.71685	1.72018	1.72351	1.72684	1.73018	1.73351	1.73684	1.74018	1.74351	1.74685	1.75019	1.75353	1.75687	1.76021	1.76355	1.76689	1.77023	1.77357	1.77692	1.78026	1.78361	1.78695	1.7903	1.79365	1.797
	0.0111111	1.72259	1.72622	1.72986	1.7335	1.73714	1.74079	1.74443	1.74807	1.75172	1.75537	1.75902	1.76267	1.76632	1.76997	1.77362	1.77728	1.78093	1.78459	1.78825	1.79191	1.79557	1.79923	1.80289	1.80655	1.81022	1.81388	1.81755	1.82121	1.82488	1.82855	1.83222	1.83589	1.83956	1.84324	1.84691	1.85059	1.85426	1.85794	1.86162	1.8653	1.86898	1.87266	1.87634	1.88002	1.8837	1.88739	1.89107	1.89476
	0.0121212	1.80458	1.80855	1.81252	1.81649	1.82047	1.82444	1.82842	1.8324	1.83638	1.84036	1.84434	1.84832	1.85231	1.85629	1.86028	1.86427	1.86826	1.87225	1.87624	1.88024	1.88423	1.88823	1.89222	1.89622	1.90022	1.90422	1.90822	1.91223	1.91623	1.92023	1.92424	1.92825	1.93225	1.93626	1.94027	1.94428	1.9483	1.95231	1.95632	1.96034	1.96435	1.96837	1.97239	1.97641	1.98043	1.98445	1.98847	1.99249
	0.0131313	1.88654	1.89084	1.89515	1.89945	1.90376	1.90807	1.91238	1.91669	1.921	1.92532	1.92963	1.93395	1.93827	1.94259	1.94691	1.95123	1.95556	1.95988	1.96421	1.96854	1.97287	1.9772	1.98153	1.98586	1.9902	1.99453	1.99887	2.00321	2.00755	2.01189	2.01623	2.02057	2.02492	2.02926	2.03361	2.03796	2.04231	2.04666	2.05101	2.05536	2.05971	2.06407	2.06842	2.07278	2.07713	2.08149	2.08585	2.09021
	0.0141414	1.96846	1.9731	1.97774	1.98237	1.98702	1.99166	1.9963	2.00095	2.00559	2.01024	2.01489	2.01954	2.0242	2.02885	2.03351	2.03817	2.04283	2.04749	2.05215	2.05681	2.06148	2.06614	2.07081	2.07548	2.08015	2.08482	2.08949	2.09417	2.09884	2.10352	2.1082	2.11288	2.11756	2.12224	2.12692	2.13161	2.13629	2.14098	2.14567	2.15036	2.15505	2.15974	2.16443	2.16912	2.17382	2.17851	2.18321	2.18791
	0.0151515	2.05035	2.05532	2.06029	2.06526	2.07024	2.07521	2.08019	2.08517	2.09015	2.09514	2.10012	2.10511	2.1101	2.11509	2.12008	2.12507	2.13006	2.13506	2.14006	2.14506	2.15006	2.15506	2.16006	2.16507	2.17007	2.17508	2.18009	2.1851	2.19011	2.19513	2.20014	2.20516	2.21017	2.21519	2.22021	2.22523	2.23026	2.23528	2.24031	2.24533	2.25036	2.25539	2.26042	2.26545	2.27048	2.27552	2.28055	2.28559
	0.0161616	2.13221	2.13751	2.14281	2.14812	2.15343	2.15874	2.16405	2.16937	2.17468	2.18	2.18532	2.19064	2.19596	2.20129	2.20661	2.21194	2.21727	2.2226	2.22794	2.23327	2.23861	2.24395	2.24929	2.25463	2.25997	2.26531	2.27066	2.27601	2.28136	2.28671	2.29206	2.29741	2.30276	2.30812	2.31348	2.31884	2.3242	2.32956	2.33492	2.34029	2.34565	2.35102	2.35639	2.36176	2.36713	2.3725	2.37787	2.38325
	0.0171717	2.21403	2.21966	2.2253	2.23094	2.23658	2.24223	2.24788	2.25353	2.25918	2.26483	2.27048	2.27614	2.2818	2.28746	2.29312	2.29878	2.30445	2.31012	2.31579	2.32146	2.32713	2.3328	2.33848	2.34416	2.34984	2.35552	2.3612	2.36689	2.37257	2.37826	2.38395	2.38964	2.39533	2.40102	2.40672	2.41242	2.41811	2.42381	2.42951	2.43522	2.44092	2.44663	2.45233	2.45804	2.46375	2.46946	2.47517	2.48088
	0.0181818	2.29581	2.30178	2.30776	2.31373	2.31971	2.32569	2.33167	2.33765	2.34364	2.34963	2.35562	2.36161	2.3676	2.3736	2.3796	2.3856	2.3916	2.3976	2.40361	2.40962	2.41562	2.42164	2.42765	2.43366	2.43968	2.4457	2.45172	2.45774	2.46376	2.46979	2.47581	2.48184	2.48787	2.4939	2.49994	2.50597	2.51201	2.51805	2.52409	2.53013	2.53617	2.54221	2.54826	2.5543	2.56035	2.5664	2.57245	2.5785
	0.0191919	2.37756	2.38387	2.39017	2.39648	2.4028	2.40911	2.41543	2.42175	2.42807	2.43439	2.44072	2.44705	2.45338	2.45971	2.46604	2.47238	2.47872	2.48506	2.4914	2.49774	2.50409	2.51044	2.51679	2.52314	2.52949	2.53585	2.54221	2.54857	2.55493	2.56129	2.56766	2.57402	2.58039	2.58676	2.59313	2.5995	2.60588	2.61226	2.61863	2.62501	2.63139	2.63778	2.64416	2.65055	2.65693	2.66332	2.66971	2.6761
	0.020202	2.45928	2.46592	2.47256	2.47921	2.48585	2.4925	2.49916	2.50581	2.51247	2.51913	2.52579	2.53245	2.53912	2.54579	2.55246	2.55913	2.56581	2.57248	2.57916	2.58584	2.59253	2.59921	2.6059	2.61259	2.61928	2.62598	2.63267	2.63937	2.64607	2.65277	2.65947	2.66618	2.67288	2.67959	2.6863	2.69301	2.69973	2.70644	2.71316	2.71988	2.7266	2.73332	2.74004	2.74677	2.7535	2.76022	2.76695	2.77369
	0.0212121	2.54096	2.54793	2.55491	2.56189	2.56888	2.57586	2.58285	2.58984	2.59683	2.60383	2.61083	2.61783	2.62483	2.63184	2.63884	2.64585	2.65287	2.65988	2.6669	2.67392	2.68094	2.68796	2.69499	2.70201	2.70904	2.71607	2.72311	2.73014	2.73718	2.74422	2.75126	2.7583	2.76535	2.7724	2.77945	2.7865	2.79355	2.80061	2.80766	2.81472	2.82178	2.82884	2.8359	2.84297	2.85004	2.85711	2.86418	2.87125
	0.0222222	2.62261	2.62992	2.63723	2.64455	2.65187	2.65919	2.66651	2.67384	2.68117	2.6885	2.69584	2.70317	2.71051	2.71785	2.7252	2.73255	2.7399	2.74725	2.7546	2.76196	2.76932	2.77668	2.78404	2.79141	2.79877	2.80614	2.81352	2.82089	2.82827	2.83565	2.84303	2.85041	2.85779	2.86518	2.87257	2.87996	2.88735	2.89475	2.90214	2.90954	2.91694	2.92434	2.93175	2.93915	2.94656	2.95397	2.96138	2.96879
	0.0232323	2.70422	2.71186	2.71951	2.72717	2.73482	2.74248	2.75014	2.7578	2.76547	2.77314	2.78081	2.78849	2.79616	2.80384	2.81152	2.81921	2.8269	2.83459	2.84228	2.84997	2.85767	2.86537	2.87307	2.88077	2.88848	2.89619	2.9039	2.91161	2.91933	2.92705	2.93477	2.94249	2.95021	2.95794	2.96567	2.9734	2.98113	2.98886	2.9966	3.00434	3.01208	3.01982	3.02756	3.03531	3.04306	3.05081	3.05856	3.06631
	0.0242424	2.78579	2.79378	2.80176	2.80975	2.81774	2.82574	2.83374	2.84174	2.84974	2.85775	2.86575	2.87377	2.88178	2.8898	2.89782	2.90584	2.91387	2.92189	2.92992	2.93796	2.94599	2.95403	2.96207	2.97011	2.97816	2.98621	2.99426	3.00231	3.01036	3.01842	3.02648	3.03454	3.04261	3.05067	3.05874	3.06681	3.07488	3.08296	3.09104	3.09911	3.10719	3.11528	3.12336	3.13145	3.13954	3.14763	3.15572	3.16381
	0.0252525	2.86734	2.87566	2.88398	2.8923	2.90063	2.90896	2.9173	2.92564	2.93398	2.94232	2.95067	2.95902	2.96737	2.97572	2.98408	2.99244	3.00081	3.00917	3.01754	3.02591	3.03429	3.04266	3.05104	3.05943	3.06781	3.0762	3.08459	3.09298	3.10137	3.10977	3.11817	3.12657	3.13498	3.14338	3.15179	3.1602	3.16862	3.17703	3.18545	3.19387	3.20229	3.21071	3.21914	3.22757	3.236	3.24443	3.25286	3.2613
	0.0262626	2.94885	2.9575	2.96616	2.97482	2.98349	2.99216	3.00083	3.0095	3.01818	3.02686	3.03555	3.04424	3.05293	3.06162	3.07032	3.07902	3.08772	3.09642	3.10513	3.11384	3.12255	3.13127	3.13999	3.14871	3.15744	3.16616	3.17489	3.18362	3.19236	3.2011	3.20984	3.21858	3.22732	3.23607	3.24482	3.25357	3.26232	3.27108	3.27984	3.2886	3.29736	3.30613	3.31489	3.32366	3.33244	3.34121	3.34998	3.35876
	0.0272727	3.03032	3.03931	3.04831	3.05731	3.06631	3.07532	3.08433	3.09334	3.10236	3.11138	3.1204	3.12942	3.13845	3.14748	3.15652	3.16556	3.1746	3.18364	3.19269	3.20174	3.21079	3.21985	3.22891	3.23797	3.24703	3.2561	3.26517	3.27424	3.28332	3.29239	3.30148	3.31056	3.31964	3.32873	3.33782	3.34691	3.35601	3.36511	3.37421	3.38331	3.39241	3.40152	3.41063	3.41974	3.42885	3.43797	3.44709	3.45621
	0.0282828	3.11176	3.12109	3.13042	3.13976	3.1491	3.15844	3.16779	3.17714	3.1865	3.19585	3.20522	3.21458	3.22395	3.23332	3.24269	3.25207	3.26145	3.27083	3.28022	3.28961	3.299	3.3084	3.3178	3.3272	3.3366	3.34601	3.35542	3.36483	3.37425	3.38367	3.39309	3.40251	3.41194	3.42137	3.4308	3.44023	3.44967	3.45911	3.46855	3.478	3.48744	3.49689	3.50634	3.5158	3.52525	3.53471	3.54417	3.55363
	0.0292929	3.19317	3.20283	3.2125	3.22218	3.23186	3.24154	3.25122	3.26091	3.27061	3.2803	3.29	3.29971	3.30941	3.31912	3.32884	3.33855	3.34827	3.358	3.36772	3.37745	3.38719	3.39692	3.40666	3.4164	3.42615	3.4359	3.44565	3.4554	3.46516	3.47492	3.48468	3.49444	3.50421	3.51398	3.52376	3.53353	3.54331	3.55309	3.56287	3.57266	3.58245	3.59224	3.60203	3.61183	3.62163	3.63143	3.64123	3.65104
	0.030303	3.27454	3.28454	3.29455	3.30456	3.31458	3.3246	3.33462	3.34465	3.35468	3.36472	3.37476	3.3848	3.39485	3.4049	3.41495	3.42501	3.43507	3.44513	3.4552	3.46527	3.47534	3.48541	3.49549	3.50558	3.51566	3.52575	3.53584	3.54594	3.55604	3.56614	3.57624	3.58635	3.59646	3.60657	3.61669	3.6268	3.63693	3.64705	3.65717	3.6673	3.67743	3.68757	3.69771	3.70784	3.71799	3.72813	3.73827	3.74842
	0.0313131	3.35587	3.36622	3.37656	3.38691	3.39727	3.40763	3.41799	3.42836	3.43873	3.4491	3.45948	3.46986	3.48025	3.49064	3.50103	3.51143	3.52183	3.53223	3.54264	3.55305	3.56346	3.57388	3.5843	3.59473	3.60515	3.61558	3.62602	3.63645	3.64689	3.65734	3.66778	3.67823	3.68868	3.69914	3.70959	3.72005	3.73052	3.74098	3.75145	3.76192	3.7724	3.78288	3.79335	3.80384	3.81432	3.82481	3.8353	3.84579
	0.0323232	3.43717	3.44786	3.45854	3.46923	3.47992	3.49062	3.50133	3.51203	3.52274	3.53346	3.54417	3.5549	3.56562	3.57635	3.58708	3.59782	3.60856	3.61931	3.63005	3.64081	3.65156	3.66232	3.67308	3.68385	3.69461	3.70539	3.71616	3.72694	3.73772	3.74851	3.7593	3.77009	3.78088	3.79168	3.80248	3.81328	3.82409	3.8349	3.84571	3.85652	3.86734	3.87816	3.88898	3.89981	3.91064	3.92147	3.9323	3.94314
	0.0333333	3.51844	3.52946	3.54049	3.55152	3.56255	3.57359	3.58463	3.59567	3.60672	3.61778	3.62883	3.6399	3.65096	3.66203	3.67311	3.68418	3.69527	3.70635	3.71744	3.72853	3.73963	3.75073	3.76183	3.77294	3.78405	3.79516	3.80628	3.8174	3.82853	3.83965	3.85078	3.86192	3.87306	3.8842	3.89534	3.90648	3.91763	3.92879	3.93994	3.9511	3.96226	3.97342	3.98459	3.99576	4.00693	4.01811	4.02929	4.04047
	0.0343434	3.59968	3.61103	3.6224	3.63377	3.64514	3.65651	3.6679	3.67928	3.69067	3.70207	3.71346	3.72487	3.73627	3.74768	3.7591	3.77052	3.78194	3.79337	3.8048	3.81623	3.82767	3.83911	3.85056	3.86201	3.87346	3.88491	3.89637	3.90784	3.9193	3.93077	3.94225	3.95372	3.9652	3.97669	3.98817	3.99966	4.01116	4.02265	4.03415	4.04565	4.05716	4.06867	4.08018	4.09169	4.10321	4.11473	4.12625	4.13777
	0.0353535	3.68088	3.69257	3.70428	3.71598	3.7277	3.73941	3.75113	3.76286	3.77459	3.78632	3.79806	3.80981	3.82155	3.8333	3.84506	3.85682	3.86858	3.88035	3.89212	3.9039	3.91568	3.92746	3.93925	3.95104	3.96284	3.97464	3.98644	3.99825	4.01006	4.02187	4.03369	4.04551	4.05733	4.06916	4.08099	4.09282	4.10466	4.1165	4.12834	4.14019	4.15204	4.16389	4.17574	4.1876	4.19946	4.21133	4.22319	4.23506
	0.0363636	3.76204	3.77408	3.78612	3.79817	3.81022	3.82228	3.83434	3.8464	3.85847	3.87055	3.88263	3.89471	3.9068	3.91889	3.93099	3.94309	3.9552	3.96731	3.97942	3.99154	4.00366	4.01579	4.02792	4.04006	4.05219	4.06434	4.07648	4.08863	4.10078	4.11294	4.1251	4.13726	4.14943	4.1616	4.17378	4.18595	4.19813	4.21032	4.22251	4.2347	4.24689	4.25909	4.27129	4.28349	4.2957	4.30791	4.32012	4.33233
	0.0373737	3.84317	3.85555	3.86793	3.88032	3.89271	3.90511	3.91751	3.92992	3.94233	3.95474	3.96716	3.97959	3.99202	4.00445	4.01689	4.02934	4.04179	4.05424	4.06669	4.07916	4.09162	4.10409	4.11656	4.12904	4.14152	4.15401	4.16649	4.17899	4.19148	4.20398	4.21649	4.229	4.24151	4.25402	4.26654	4.27906	4.29159	4.30412	4.31665	4.32919	4.34172	4.35427	4.36681	4.37936	4.39191	4.40447	4.41702	4.42958
	0.0383838	3.92427	3.93698	3.94971	3.96243	3.97517	3.9879	4.00065	4.0134	4.02615	4.03891	4.05167	4.06444	4.07721	4.08998	4.10277	4.11555	4.12834	4.14114	4.15394	4.16674	4.17955	4.19236	4.20518	4.218	4.23082	4.24365	4.25648	4.26932	4.28216	4.295	4.30785	4.3207	4.33356	4.34642	4.35928	4.37215	4.38502	4.39789	4.41077	4.42365	4.43654	4.44942	4.46231	4.47521	4.4881	4.501	4.51391	4.52681
	0.0393939	4.00533	4.01839	4.03145	4.04452	4.05759	4.07067	4.08375	4.09684	4.10994	4.12304	4.13614	4.14925	4.16237	4.17548	4.18861	4.20174	4.21487	4.22801	4.24115	4.2543	4.26745	4.2806	4.29376	4.30693	4.32009	4.33327	4.34644	4.35962	4.37281	4.386	4.39919	4.41239	4.42559	4.43879	4.452	4.46521	4.47843	4.49165	4.50487	4.5181	4.53133	4.54456	4.55779	4.57103	4.58428	4.59752	4.61077	4.62403
	0.040404	4.08636	4.09976	4.11316	4.12657	4.13998	4.1534	4.16683	4.18026	4.1937	4.20714	4.22058	4.23403	4.24749	4.26095	4.27442	4.28789	4.30137	4.31485	4.32833	4.34182	4.35532	4.36882	4.38232	4.39583	4.40934	4.42286	4.43638	4.4499	4.46343	4.47697	4.4905	4.50405	4.51759	4.53114	4.54469	4.55825	4.57181	4.58538	4.59895	4.61252	4.62609	4.63967	4.65325	4.66684	4.68043	4.69402	4.70762	4.72122
	0.0414141	4.16735	4.18109	4.19483	4.20859	4.22234	4.2361	4.24987	4.26364	4.27742	4.29121	4.30499	4.31879	4.33259	4.34639	4.3602	4.37402	4.38783	4.40166	4.41549	4.42932	4.44316	4.457	4.47085	4.4847	4.49856	4.51242	4.52629	4.54016	4.55403	4.56791	4.58179	4.59568	4.60957	4.62347	4.63736	4.65127	4.66517	4.67909	4.693	4.70692	4.72084	4.73476	4.74869	4.76263	4.77656	4.7905	4.80444	4.81839
	0.0424242	4.24831	4.26239	4.27648	4.29057	4.30467	4.31877	4.33288	4.34699	4.36112	4.37524	4.38937	4.40351	4.41765	4.4318	4.44595	4.46011	4.47427	4.48844	4.50261	4.51679	4.53097	4.54516	4.55935	4.57355	4.58775	4.60196	4.61617	4.63038	4.6446	4.65883	4.67306	4.68729	4.70153	4.71577	4.73001	4.74426	4.75851	4.77277	4.78703	4.8013	4.81556	4.82984	4.84411	4.85839	4.87267	4.88696	4.90125	4.91554
	0.0434343	4.32924	4.34366	4.35809	4.37252	4.38696	4.40141	4.41586	4.43031	4.44478	4.45925	4.47372	4.4882	4.50269	4.51718	4.53167	4.54618	4.56068	4.57519	4.58971	4.60423	4.61876	4.63329	4.64783	4.66237	4.67692	4.69147	4.70603	4.72059	4.73515	4.74972	4.7643	4.77887	4.79346	4.80804	4.82263	4.83723	4.85183	4.86643	4.88104	4.89565	4.91027	4.92489	4.93951	4.95414	4.96877	4.9834	4.99804	5.01268
	0.0444444	4.41013	4.42489	4.43966	4.45444	4.46922	4.48401	4.4988	4.5136	4.52841	4.54322	4.55804	4.57286	4.58769	4.60253	4.61737	4.63221	4.64706	4.66192	4.67678	4.69165	4.70652	4.7214	4.73628	4.75117	4.76606	4.78095	4.79586	4.81076	4.82567	4.84059	4.85551	4.87043	4.88536	4.9003	4.91523	4.93018	4.94512	4.96007	4.97503	4.98999	5.00495	5.01991	5.03488	5.04986	5.06484	5.07982	5.0948	5.10979
	0.0454545	4.49098	4.50609	4.5212	4.53632	4.55145	4.56658	4.58171	4.59686	4.61201	4.62716	4.64232	4.65749	4.67266	4.68784	4.70303	4.71822	4.73341	4.74861	4.76382	4.77903	4.79425	4.80947	4.8247	4.83993	4.85517	4.87041	4.88566	4.90091	4.91617	4.93143	4.9467	4.96197	4.97724	4.99252	5.00781	5.0231	5.03839	5.05369	5.06899	5.0843	5.09961	5.11492	5.13024	5.14556	5.16089	5.17622	5.19155	5.20689
	0.0464646	4.57181	4.58726	4.60271	4.61817	4.63364	4.64911	4.66459	4.68008	4.69557	4.71107	4.72658	4.74209	4.75761	4.77313	4.78866	4.80419	4.81973	4.83528	4.85083	4.86639	4.88195	4.89752	4.91309	4.92867	4.94425	4.95984	4.97544	4.99104	5.00664	5.02225	5.03786	5.05348	5.0691	5.08473	5.10036	5.116	5.13164	5.14728	5.16293	5.17859	5.19425	5.20991	5.22557	5.24124	5.25692	5.2726	5.28828	5.30396
	0.0474747	4.6526	4.66839	4.68419	4.69999	4.7158	4.73162	4.74744	4.76327	4.77911	4.79495	4.8108	4.82666	4.84252	4.85839	4.87426	4.89014	4.90603	4.92192	4.93781	4.95372	4.96963	4.98554	5.00146	5.01738	5.03331	5.04925	5.06519	5.08113	5.09708	5.11304	5.129	5.14497	5.16094	5.17691	5.19289	5.20887	5.22486	5.24086	5.25685	5.27286	5.28886	5.30487	5.32089	5.33691	5.35293	5.36895	5.38499	5.40102
	0.0484848	4.73335	4.74949	4.76563	4.78177	4.79793	4.81409	4.83026	4.84643	4.86261	4.8788	4.89499	4.91119	4.9274	4.94361	4.95983	4.97606	4.99229	5.00853	5.02477	5.04102	5.05727	5.07353	5.0898	5.10607	5.12234	5.13863	5.15491	5.17121	5.1875	5.20381	5.22011	5.23643	5.25274	5.26907	5.28539	5.30173	5.31806	5.3344	5.35075	5.3671	5.38346	5.39981	5.41618	5.43255	5.44892	5.46529	5.48167	5.49806
	0.0494949	4.81407	4.83055	4.84703	4.86352	4.88002	4.89653	4.91304	4.92956	4.94608	4.96262	4.97915	4.9957	5.01225	5.02881	5.04537	5.06194	5.07852	5.0951	5.11169	5.12829	5.14489	5.16149	5.17811	5.19473	5.21135	5.22798	5.24461	5.26125	5.2779	5.29455	5.3112	5.32786	5.34453	5.3612	5.37788	5.39456	5.41124	5.42793	5.44463	5.46132	5.47803	5.49474	5.51145	5.52817	5.54489	5.56161	5.57834	5.59508
	0.0505051	4.89476	4.91158	4.92841	4.94524	4.96209	4.97893	4.99579	5.01265	5.02952	5.0464	5.06328	5.08018	5.09707	5.11398	5.13089	5.1478	5.16473	5.18165	5.19859	5.21553	5.23248	5.24943	5.26639	5.28336	5.30033	5.3173	5.33428	5.35127	5.36826	5.38526	5.40227	5.41928	5.43629	5.45331	5.47033	5.48736	5.5044	5.52143	5.53848	5.55553	5.57258	5.58964	5.6067	5.62377	5.64084	5.65791	5.67499	5.69207
	0.0515152	4.97541	4.99258	5.00975	5.02693	5.04411	5.06131	5.07851	5.09572	5.11293	5.13015	5.14738	5.16462	5.18186	5.19911	5.21637	5.23363	5.2509	5.26818	5.28546	5.30275	5.32004	5.33734	5.35465	5.37196	5.38928	5.4066	5.42393	5.44127	5.45861	5.47595	5.49331	5.51066	5.52803	5.54539	5.56277	5.58014	5.59753	5.61492	5.63231	5.64971	5.66711	5.68452	5.70193	5.71934	5.73676	5.75419	5.77162	5.78905
	0.0525253	5.05603	5.07354	5.09106	5.10858	5.12611	5.14365	5.1612	5.17875	5.19631	5.21388	5.23145	5.24903	5.26662	5.28422	5.30182	5.31943	5.33705	5.35467	5.3723	5.38993	5.40757	5.42522	5.44288	5.46054	5.4782	5.49587	5.51355	5.53124	5.54892	5.56662	5.58432	5.60203	5.61974	5.63745	5.65518	5.6729	5.69064	5.70837	5.72612	5.74386	5.76162	5.77937	5.79714	5.8149	5.83267	5.85045	5.86823	5.88601
	0.0535354	5.13662	5.15447	5.17233	5.1902	5.20807	5.22596	5.24385	5.26175	5.27965	5.29757	5.31549	5.33342	5.35135	5.36929	5.38724	5.4052	5.42316	5.44113	5.45911	5.47709	5.49508	5.51307	5.53108	5.54908	5.5671	5.58512	5.60315	5.62118	5.63922	5.65726	5.67531	5.69336	5.71143	5.72949	5.74756	5.76564	5.78372	5.80181	5.8199	5.838	5.8561	5.87421	5.89232	5.91044	5.92856	5.94669	5.96482	5.98295
	0.0545455	5.21717	5.23537	5.25357	5.27178	5.29001	5.30823	5.32647	5.34472	5.36297	5.38123	5.39949	5.41777	5.43605	5.45434	5.47264	5.49094	5.50925	5.52757	5.54589	5.56422	5.58256	5.6009	5.61925	5.63761	5.65597	5.67434	5.69271	5.71109	5.72948	5.74788	5.76627	5.78468	5.80309	5.82151	5.83993	5.85835	5.87679	5.89522	5.91367	5.93211	5.95057	5.96903	5.98749	6.00596	6.02443	6.04291	6.06139	6.07988
	0.0555556	5.29769	5.31623	5.33478	5.35334	5.3719	5.39048	5.40906	5.42765	5.44625	5.46486	5.48347	5.50209	5.52072	5.53935	5.558	5.57665	5.59531	5.61397	5.63264	5.65132	5.67001	5.6887	5.7074	5.7261	5.74481	5.76353	5.78226	5.80099	5.81972	5.83847	5.85721	5.87597	5.89473	5.91349	5.93227	5.95104	5.96983	5.98861	6.00741	6.02621	6.04501	6.06382	6.08263	6.10145	6.12028	6.13911	6.15794	6.17678
	0.0565657	5.37817	5.39706	5.41595	5.43486	5.45377	5.47269	5.49162	5.51056	5.5295	5.54845	5.56741	5.58638	5.60536	5.62434	5.64333	5.66233	5.68133	5.70035	5.71937	5.73839	5.75743	5.77647	5.79552	5.81457	5.83363	5.8527	5.87177	5.89085	5.90994	5.92903	5.94813	5.96723	5.98634	6.00546	6.02458	6.04371	6.06284	6.08198	6.10113	6.12028	6.13943	6.15859	6.17776	6.19693	6.2161	6.23528	6.25447	6.27366
	0.0575758	5.45862	5.47785	5.4971	5.51634	5.5356	5.55487	5.57414	5.59343	5.61272	5.63202	5.65133	5.67064	5.68996	5.7093	5.72863	5.74798	5.76733	5.78669	5.80606	5.82544	5.84482	5.86421	5.88361	5.90301	5.92242	5.94184	5.96126	5.98069	6.00013	6.01957	6.03902	6.05847	6.07793	6.0974	6.11687	6.13635	6.15584	6.17533	6.19482	6.21433	6.23383	6.25334	6.27286	6.29238	6.31191	6.33144	6.35098	6.37052
	0.0585859	5.53904	5.55862	5.5782	5.5978	5.6174	5.63702	5.65664	5.67627	5.69591	5.71555	5.73521	5.75487	5.77454	5.79422	5.81391	5.8336	5.8533	5.87301	5.89273	5.91246	5.93219	5.95193	5.97167	5.99142	6.01118	6.03095	6.05072	6.0705	6.09029	6.11008	6.12988	6.14969	6.1695	6.18932	6.20914	6.22897	6.24881	6.26865	6.2885	6.30835	6.32821	6.34807	6.36794	6.38782	6.4077	6.42758	6.44747	6.46737
	0.059596	5.61942	5.63934	5.65928	5.67922	5.69917	5.71913	5.7391	5.75908	5.77906	5.79906	5.81906	5.83907	5.85909	5.87912	5.89915	5.91919	5.93924	5.9593	5.97937	5.99944	6.01952	6.03961	6.05971	6.07981	6.09992	6.12004	6.14016	6.16029	6.18043	6.20057	6.22072	6.24088	6.26104	6.28121	6.30139	6.32157	6.34176	6.36195	6.38215	6.40236	6.42257	6.44278	6.46301	6.48323	6.50346	6.5237	6.54394	6.56419
	0.0606061	5.69977	5.72004	5.74032	5.76061	5.78091	5.80121	5.82153	5.84185	5.86219	5.88253	5.90288	5.92324	5.94361	5.96398	5.98436	6.00476	6.02516	6.04556	6.06598	6.0864	6.10683	6.12727	6.14772	6.16817	6.18863	6.2091	6.22957	6.25006	6.27054	6.29104	6.31154	6.33205	6.35256	6.37308	6.39361	6.41414	6.43468	6.45523	6.47578	6.49634	6.5169	6.53747	6.55805	6.57863	6.59921	6.6198	6.6404	6.661
	0.0616162	5.78008	5.8007	5.82133	5.84196	5.86261	5.88326	5.90392	5.9246	5.94528	5.96597	5.98667	6.00738	6.02809	6.04882	6.06955	6.09029	6.11104	6.1318	6.15256	6.17334	6.19412	6.2149	6.2357	6.2565	6.27732	6.29813	6.31896	6.33979	6.36063	6.38148	6.40233	6.42319	6.44406	6.46493	6.48581	6.5067	6.52759	6.54849	6.56939	6.5903	6.61122	6.63214	6.65307	6.674	6.69494	6.71588	6.73683	6.75778
	0.0626263	5.86037	5.88133	5.9023	5.92328	5.94428	5.96528	5.98629	6.00731	6.02834	6.04938	6.07043	6.09148	6.11255	6.13362	6.1547	6.17579	6.19689	6.218	6.23912	6.26024	6.28137	6.30251	6.32366	6.34481	6.36597	6.38714	6.40832	6.4295	6.45069	6.47189	6.4931	6.51431	6.53553	6.55675	6.57798	6.59922	6.62047	6.64172	6.66298	6.68424	6.70551	6.72678	6.74806	6.76935	6.79064	6.81194	6.83324	6.85455
	0.0636364	5.94061	5.96192	5.98324	6.00457	6.02591	6.04726	6.06862	6.08999	6.11137	6.13276	6.15415	6.17556	6.19697	6.2184	6.23983	6.26127	6.28272	6.30417	6.32564	6.34711	6.3686	6.39009	6.41158	6.43309	6.4546	6.47612	6.49765	6.51919	6.54073	6.56228	6.58384	6.6054	6.62697	6.64855	6.67014	6.69173	6.71332	6.73493	6.75654	6.77816	6.79978	6.82141	6.84304	6.86468	6.88633	6.90798	6.92964	6.9513
	0.0646465	6.02083	6.04248	6.06415	6.08583	6.10752	6.12922	6.15092	6.17264	6.19437	6.2161	6.23785	6.2596	6.28137	6.30314	6.32492	6.34671	6.36851	6.39032	6.41214	6.43396	6.45579	6.47764	6.49948	6.52134	6.54321	6.56508	6.58696	6.60885	6.63074	6.65264	6.67455	6.69647	6.7184	6.74033	6.76226	6.78421	6.80616	6.82812	6.85008	6.87205	6.89403	6.91601	6.938	6.95999	6.98199	7.004	7.02601	7.04803
	0.0656566	6.10101	6.12301	6.14503	6.16705	6.18909	6.21114	6.23319	6.25526	6.27734	6.29942	6.32152	6.34362	6.36573	6.38786	6.40999	6.43213	6.45428	6.47644	6.49861	6.52078	6.54296	6.56516	6.58736	6.60957	6.63178	6.65401	6.67624	6.69848	6.72073	6.74298	6.76525	6.78752	6.80979	6.83208	6.85437	6.87667	6.89897	6.92128	6.9436	6.96592	6.98825	7.01059	7.03293	7.05528	7.07764	7.1	7.12237	7.14474
	0.0666667	6.18115	6.20351	6.22587	6.24825	6.27063	6.29303	6.31543	6.33785	6.36027	6.38271	6.40515	6.4276	6.45007	6.47254	6.49502	6.51752	6.54002	6.56253	6.58504	6.60757	6.63011	6.65265	6.6752	6.69776	6.72033	6.74291	6.7655	6.78809	6.81069	6.8333	6.85591	6.87854	6.90117	6.9238	6.94645	6.9691	6.99176	7.01442	7.0371	7.05978	7.08246	7.10515	7.12785	7.15055	7.17326	7.19598	7.2187	7.24143
	0.0676768	6.26127	6.28397	6.30668	6.3294	6.35214	6.37488	6.39764	6.4204	6.44318	6.46596	6.48875	6.51156	6.53437	6.5572	6.58003	6.60287	6.62572	6.64859	6.67146	6.69433	6.71722	6.74012	6.76302	6.78594	6.80886	6.83179	6.85473	6.87767	6.90062	6.92359	6.94656	6.96953	6.99252	7.01551	7.03851	7.06151	7.08452	7.10754	7.13057	7.1536	7.17664	7.19969	7.22274	7.2458	7.26887	7.29194	7.31502	7.3381
	0.0686869	6.34135	6.3644	6.38746	6.41053	6.43361	6.4567	6.47981	6.50292	6.52605	6.54918	6.57233	6.59548	6.61865	6.64182	6.66501	6.6882	6.7114	6.73462	6.75784	6.78107	6.80431	6.82756	6.85081	6.87408	6.89735	6.92064	6.94393	6.96723	6.99053	7.01385	7.03717	7.0605	7.08384	7.10719	7.13054	7.1539	7.17727	7.20064	7.22402	7.24741	7.27081	7.29421	7.31762	7.34103	7.36445	7.38788	7.41131	7.43475
	0.069697	6.42139	6.44479	6.4682	6.49162	6.51505	6.5385	6.56195	6.58541	6.60889	6.63237	6.65587	6.67938	6.70289	6.72642	6.74995	6.7735	6.79705	6.82062	6.84419	6.86778	6.89137	6.91497	6.93858	6.9622	6.98583	7.00946	7.03311	7.05676	7.08042	7.10409	7.12777	7.15145	7.17514	7.19884	7.22255	7.24627	7.26999	7.29372	7.31745	7.3412	7.36495	7.38871	7.41247	7.43624	7.46002	7.4838	7.50759	7.53138
	0.0707071	6.5014	6.52515	6.54891	6.57268	6.59646	6.62026	6.64406	6.66787	6.6917	6.71554	6.73938	6.76324	6.78711	6.81098	6.83487	6.85877	6.88268	6.90659	6.93052	6.95445	6.9784	7.00235	7.02632	7.05029	7.07427	7.09826	7.12226	7.14626	7.17028	7.1943	7.21833	7.24237	7.26642	7.29048	7.31454	7.33861	7.36269	7.38677	7.41086	7.43496	7.45907	7.48318	7.5073	7.53143	7.55556	7.5797	7.60385	7.628
	0.0717172	6.58138	6.60548	6.62959	6.65371	6.67784	6.70198	6.72614	6.7503	6.77448	6.79867	6.82286	6.84707	6.87129	6.89552	6.91976	6.94401	6.96827	6.99254	7.01682	7.0411	7.0654	7.08971	7.11403	7.13835	7.16269	7.18703	7.21138	7.23574	7.26011	7.28449	7.30888	7.33327	7.35767	7.38208	7.4065	7.43093	7.45536	7.4798	7.50425	7.5287	7.55317	7.57764	7.60211	7.62659	7.65108	7.67558	7.70008	7.72459
	0.0727273	6.66133	6.68577	6.71023	6.7347	6.75918	6.78368	6.80818	6.8327	6.85723	6.88176	6.90631	6.93087	6.95544	6.98003	7.00462	7.02922	7.05383	7.07845	7.10309	7.12773	7.15238	7.17704	7.20171	7.22639	7.25108	7.27578	7.30048	7.3252	7.34992	7.37465	7.3994	7.42415	7.4489	7.47367	7.49844	7.52322	7.54801	7.57281	7.59761	7.62242	7.64724	7.67207	7.6969	7.72174	7.74659	7.77144	7.7963	7.82117
	0.0737374	6.74124	6.76604	6.79084	6.81566	6.8405	6.86534	6.8902	6.91506	6.93994	6.96483	6.98973	7.01465	7.03957	7.0645	7.08945	7.1144	7.13937	7.16434	7.18933	7.21432	7.23933	7.26434	7.28937	7.3144	7.33944	7.36449	7.38956	7.41463	7.43971	7.46479	7.48989	7.51499	7.54011	7.56523	7.59036	7.6155	7.64064	7.66579	7.69096	7.71612	7.7413	7.76648	7.79167	7.81687	7.84207	7.86728	7.8925	7.91772
	0.0747475	6.82112	6.84626	6.87142	6.89659	6.92178	6.94697	6.97218	6.9974	7.02263	7.04787	7.07312	7.09839	7.12366	7.14895	7.17425	7.19955	7.22487	7.2502	7.27554	7.30089	7.32625	7.35162	7.37699	7.40238	7.42778	7.45319	7.4786	7.50403	7.52946	7.55491	7.58036	7.60582	7.63129	7.65677	7.68225	7.70775	7.73325	7.75876	7.78427	7.8098	7.83533	7.86087	7.88642	7.91197	7.93753	7.9631	7.98868	8.01426
	0.0757576	6.90096	6.92646	6.95197	6.97749	7.00302	7.02857	7.05413	7.0797	7.10528	7.13088	7.15648	7.1821	7.20773	7.23336	7.25901	7.28468	7.31035	7.33603	7.36172	7.38743	7.41314	7.43886	7.4646	7.49034	7.51609	7.54185	7.56763	7.59341	7.6192	7.645	7.6708	7.69662	7.72245	7.74828	7.77412	7.79997	7.82583	7.8517	7.87757	7.90345	7.92934	7.95524	7.98115	8.00706	8.03298	8.0589	8.08484	8.11078
	0.0767677	6.98077	7.00662	7.03248	7.05835	7.08424	7.11014	7.13605	7.16197	7.1879	7.21385	7.23981	7.26578	7.29176	7.31775	7.34375	7.36977	7.3958	7.42183	7.44788	7.47394	7.5	7.52608	7.55217	7.57827	7.60438	7.63049	7.65662	7.68276	7.7089	7.73506	7.76122	7.7874	7.81358	7.83977	7.86597	7.89218	7.91839	7.94462	7.97085	7.99709	8.02334	8.04959	8.07585	8.10212	8.1284	8.15468	8.18098	8.20727
	0.0777778	7.06055	7.08675	7.11296	7.13919	7.16542	7.19167	7.21793	7.24421	7.2705	7.29679	7.32311	7.34943	7.37576	7.40211	7.42847	7.45483	7.48121	7.5076	7.53401	7.56042	7.58684	7.61327	7.63972	7.66617	7.69264	7.71911	7.74559	7.77208	7.79859	7.8251	7.85162	7.87815	7.90469	7.93124	7.95779	7.98436	8.01093	8.03751	8.0641	8.0907	8.1173	8.14392	8.17054	8.19717	8.2238	8.25045	8.2771	8.30375
	0.0787879	7.1403	7.16685	7.19341	7.21998	7.24657	7.27317	7.29979	7.32642	7.35306	7.37971	7.40637	7.43305	7.45974	7.48644	7.51315	7.53987	7.5666	7.59335	7.62011	7.64687	7.67365	7.70044	7.72724	7.75405	7.78087	7.8077	7.83454	7.86139	7.88824	7.91511	7.94199	7.96888	7.99577	8.02268	8.04959	8.07652	8.10345	8.13039	8.15733	8.18429	8.21125	8.23822	8.2652	8.29219	8.31919	8.34619	8.3732	8.40021
	0.079798	7.22001	7.24691	7.27382	7.30075	7.32769	7.35465	7.38161	7.40859	7.43558	7.46259	7.48961	7.51664	7.54368	7.57073	7.5978	7.62488	7.65196	7.67906	7.70618	7.7333	7.76043	7.78758	7.81473	7.8419	7.86907	7.89626	7.92345	7.95066	7.97788	8.0051	8.03234	8.05958	8.08683	8.1141	8.14137	8.16865	8.19594	8.22324	8.25054	8.27786	8.30518	8.33251	8.35985	8.38719	8.41455	8.44191	8.46928	8.49665
	0.0808081	7.29969	7.32694	7.3542	7.38148	7.40878	7.43608	7.4634	7.49074	7.51808	7.54544	7.57281	7.6002	7.62759	7.655	7.68242	7.70985	7.7373	7.76475	7.79222	7.8197	7.84719	7.87469	7.9022	7.92972	7.95725	7.98479	8.01235	8.03991	8.06748	8.09507	8.12266	8.15026	8.17787	8.20549	8.23312	8.26076	8.28841	8.31607	8.34373	8.3714	8.39908	8.42677	8.45447	8.48218	8.50989	8.53761	8.56534	8.59307
	0.0818182	7.37933	7.40694	7.43455	7.46219	7.48983	7.51749	7.54516	7.57285	7.60055	7.62826	7.65599	7.68373	7.71148	7.73924	7.76701	7.7948	7.8226	7.85041	7.87823	7.90607	7.93391	7.96177	7.98964	8.01752	8.0454	8.0733	8.10121	8.12913	8.15706	8.18501	8.21296	8.24092	8.26889	8.29686	8.32485	8.35285	8.38086	8.40887	8.4369	8.46493	8.49297	8.52102	8.54907	8.57714	8.60521	8.63329	8.66138	8.68948
	0.0828283	7.45894	7.4869	7.51487	7.54285	7.57085	7.59887	7.62689	7.65493	7.68299	7.71105	7.73913	7.76722	7.79533	7.82345	7.85158	7.87972	7.90787	7.93604	7.96422	7.99241	8.02061	8.04882	8.07705	8.10528	8.13353	8.16179	8.19005	8.21833	8.24662	8.27492	8.30323	8.33155	8.35987	8.38821	8.41656	8.44492	8.47328	8.50166	8.53004	8.55843	8.58683	8.61524	8.64366	8.67208	8.70051	8.72896	8.7574	8.78586
	0.0838384	7.53852	7.56683	7.59515	7.62349	7.65184	7.68021	7.70859	7.73698	7.76539	7.79381	7.82225	7.85069	7.87915	7.90763	7.93611	7.96461	7.99312	8.02164	8.05018	8.07872	8.10728	8.13585	8.16443	8.19303	8.22163	8.25024	8.27887	8.30751	8.33615	8.36481	8.39348	8.42215	8.45084	8.47954	8.50824	8.53696	8.56568	8.59442	8.62316	8.65191	8.68067	8.70944	8.73822	8.767	8.7958	8.8246	8.85341	8.88222
	0.0848485	7.61807	7.64673	7.6754	7.70409	7.7328	7.76152	7.79025	7.819	7.84776	7.87654	7.90533	7.93413	7.96295	7.99177	8.02062	8.04947	8.07834	8.10722	8.13611	8.16501	8.19393	8.22285	8.25179	8.28074	8.3097	8.33868	8.36766	8.39665	8.42566	8.45467	8.4837	8.51274	8.54178	8.57084	8.5999	8.62898	8.65806	8.68716	8.71626	8.74537	8.77449	8.80362	8.83276	8.8619	8.89106	8.92022	8.94939	8.97857
	0.0858586	7.69758	7.72659	7.75562	7.78467	7.81372	7.8428	7.87189	7.90099	7.93011	7.95924	7.98838	8.01754	8.04671	8.07589	8.10509	8.1343	8.16353	8.19276	8.22201	8.25127	8.28054	8.30983	8.33912	8.36843	8.39775	8.42708	8.45642	8.48578	8.51514	8.54451	8.5739	8.60329	8.6327	8.66211	8.69154	8.72097	8.75042	8.77987	8.80934	8.83881	8.86829	8.89778	8.92728	8.95679	8.9863	9.01582	9.04536	9.0749
	0.0868687	7.77706	7.80642	7.83581	7.8652	7.89462	7.92405	7.95349	7.98295	8.01242	8.0419	8.0714	8.10092	8.13044	8.15998	8.18954	8.2191	8.24868	8.27828	8.30788	8.3375	8.36713	8.39677	8.42643	8.45609	8.48577	8.51546	8.54516	8.57487	8.6046	8.63433	8.66407	8.69383	8.72359	8.75337	8.78315	8.81295	8.84275	8.87257	8.90239	8.93222	8.96207	8.99192	9.02178	9.05165	9.08152	9.11141	9.1413	9.1712
	0.0878788	7.8565	7.88622	7.91596	7.94571	7.97548	8.00526	8.03506	8.06487	8.0947	8.12454	8.15439	8.18426	8.21415	8.24404	8.27395	8.30388	8.33382	8.36377	8.39373	8.4237	8.45369	8.48369	8.5137	8.54373	8.57377	8.60381	8.63387	8.66394	8.69403	8.72412	8.75422	8.78434	8.81446	8.8446	8.87474	8.9049	8.93506	8.96524	8.99542	9.02562	9.05582	9.08603	9.11626	9.14649	9.17672	9.20697	9.23723	9.26749
	0.0888889	7.93591	7.96599	7.99608	8.02619	8.05631	8.08644	8.1166	8.14677	8.17695	8.20714	8.23736	8.26758	8.29782	8.32807	8.35834	8.38862	8.41892	8.44922	8.47955	8.50988	8.54022	8.57058	8.60095	8.63134	8.66173	8.69214	8.72256	8.75299	8.78343	8.81388	8.84435	8.87482	8.90531	8.9358	8.96631	8.99683	9.02735	9.05789	9.08844	9.11899	9.14956	9.18013	9.21071	9.2413	9.27191	9.30251	9.33313	9.36376
	0.089899	8.01529	8.04572	8.07617	8.10663	8.1371	8.1676	8.1981	8.22863	8.25917	8.28972	8.32029	8.35087	8.38147	8.41208	8.4427	8.47334	8.50399	8.53466	8.56533	8.59603	8.62673	8.65745	8.68818	8.71892	8.74967	8.78044	8.81122	8.84201	8.87281	8.90362	8.93445	8.96528	8.99613	9.02699	9.05785	9.08873	9.11962	9.15052	9.18142	9.21234	9.24327	9.2742	9.30515	9.3361	9.36707	9.39804	9.42902	9.46001
	0.0909091	8.09464	8.12542	8.15622	8.18704	8.21787	8.24872	8.27958	8.31046	8.34135	8.37226	8.40319	8.43413	8.46508	8.49605	8.52703	8.55803	8.58903	8.62006	8.6511	8.68215	8.71321	8.74429	8.77537	8.80648	8.83759	8.86872	8.89985	8.931	8.96217	8.99334	9.02452	9.05572	9.08693	9.11815	9.14937	9.18061	9.21186	9.24312	9.27439	9.30567	9.33696	9.36826	9.39957	9.43088	9.46221	9.49354	9.52489	9.55624
	0.0919192	8.17395	8.20509	8.23624	8.26741	8.2986	8.3298	8.36102	8.39226	8.42351	8.45478	8.48606	8.51735	8.54866	8.57999	8.61133	8.64268	8.67405	8.70543	8.73683	8.76824	8.79966	8.8311	8.86254	8.894	8.92548	8.95696	8.98846	9.01997	9.0515	9.08303	9.11458	9.14613	9.1777	9.20928	9.24087	9.27247	9.30408	9.3357	9.36734	9.39898	9.43063	9.46229	9.49396	9.52564	9.55733	9.58903	9.62073	9.65245
	0.0929293	8.25323	8.28472	8.31623	8.34776	8.3793	8.41086	8.44244	8.47403	8.50564	8.53726	8.5689	8.60055	8.63222	8.6639	8.6956	8.72731	8.75904	8.79078	8.82253	8.8543	8.88608	8.91788	8.94969	8.98151	9.01334	9.04519	9.07705	9.10892	9.1408	9.1727	9.2046	9.23652	9.26845	9.30039	9.33234	9.36431	9.39628	9.42827	9.46026	9.49226	9.52428	9.5563	9.58834	9.62038	9.65243	9.68449	9.71656	9.74864
	0.0939394	8.33248	8.36432	8.39619	8.42807	8.45997	8.49189	8.52382	8.55577	8.58773	8.61971	8.65171	8.68372	8.71574	8.74778	8.77984	8.81191	8.844	8.8761	8.90821	8.94034	8.97248	9.00463	9.0368	9.06898	9.10118	9.13338	9.1656	9.19784	9.23008	9.26234	9.29461	9.32689	9.35918	9.39148	9.4238	9.45612	9.48846	9.5208	9.55316	9.58553	9.61791	9.65029	9.68269	9.7151	9.74751	9.77994	9.81237	9.84481
	0.0949495	8.41169	8.44389	8.47611	8.50835	8.54061	8.57288	8.60517	8.63747	8.66979	8.70213	8.73448	8.76685	8.79924	8.83164	8.86405	8.89648	8.92893	8.96139	8.99386	9.02635	9.05885	9.09136	9.12389	9.15643	9.18899	9.22156	9.25414	9.28673	9.31934	9.35195	9.38458	9.41723	9.44988	9.48255	9.51522	9.54791	9.58061	9.61332	9.64604	9.67877	9.71151	9.74426	9.77702	9.80979	9.84257	9.87536	9.90816	9.94097
	0.0959596	8.49087	8.52343	8.55601	8.5886	8.62121	8.65384	8.68649	8.71915	8.75183	8.78452	8.81723	8.84996	8.8827	8.91546	8.94823	8.98102	9.01383	9.04665	9.07948	9.11233	9.14519	9.17806	9.21095	9.24386	9.27677	9.3097	9.34264	9.3756	9.40857	9.44155	9.47454	9.50754	9.54056	9.57359	9.60663	9.63968	9.67274	9.70581	9.7389	9.77199	9.8051	9.83821	9.87134	9.90447	9.93761	9.97077	10.0039	10.0371
	0.0969697	8.57002	8.60293	8.63586	8.66882	8.70178	8.73477	8.76777	8.80079	8.83383	8.86688	8.89995	8.93304	8.96614	8.99926	9.03239	9.06554	9.0987	9.13188	9.16507	9.19828	9.2315	9.26474	9.29799	9.33125	9.36453	9.39782	9.43112	9.46444	9.49777	9.53111	9.56447	9.59784	9.63121	9.66461	9.69801	9.73142	9.76485	9.79828	9.83173	9.86519	9.89866	9.93214	9.96563	9.99913	10.0326	10.0662	10.0997	10.1332
	0.0979798	8.64913	8.6824	8.71569	8.749	8.78232	8.81567	8.84903	8.88241	8.9158	8.94921	8.98264	9.01608	9.04954	9.08302	9.11651	9.15002	9.18354	9.21708	9.25064	9.2842	9.31779	9.35138	9.385	9.41862	9.45226	9.48591	9.51958	9.55326	9.58695	9.62066	9.65437	9.6881	9.72185	9.7556	9.78937	9.82314	9.85693	9.89073	9.92455	9.95837	9.9922	10.026	10.0599	10.0938	10.1276	10.1615	10.1954	10.2293
	0.0989899	8.72821	8.76184	8.79549	8.82915	8.86283	8.89653	8.93025	8.96399	8.99774	9.03151	9.0653	9.0991	9.13292	9.16676	9.20061	9.23448	9.26836	9.30226	9.33617	9.3701	9.40405	9.438	9.47198	9.50596	9.53996	9.57398	9.60801	9.64205	9.6761	9.71017	9.74425	9.77835	9.81245	9.84657	9.8807	9.91484	9.949	9.98316	10.0173	10.0515	10.0857	10.1199	10.1541	10.1884	10.2226	10.2569	10.2911	10.3254
	0.1	8.80726	8.84125	8.87525	8.90927	8.94331	8.97737	9.01144	9.04554	9.07965	9.11378	9.14792	9.18209	9.21627	9.25046	9.28467	9.3189	9.35315	9.38741	9.42168	9.45597	9.49028	9.5246	9.55893	9.59328	9.62764	9.66202	9.69641	9.73082	9.76523	9.79967	9.83411	9.86857	9.90304	9.93752	9.97201	10.0065	10.041	10.0756	10.1101	10.1447	10.1792	10.2138	10.2484	10.283	10.3176	10.3522	10.3868	10.4215
[truncated: 52 more columns]

## Sheet: Fig4C
		Time between speciation and introgression
		0.01	0.019899	0.029798	0.039697	0.049596	0.0594949	0.0693939	0.0792929	0.0891919	0.0990909	0.10899	0.118889	0.128788	0.138687	0.148586	0.158485	0.168384	0.178283	0.188182	0.198081	0.20798	0.217879	0.227778	0.237677	0.247576	0.257475	0.267374	0.277273	0.287172	0.297071	0.30697	0.316869	0.326768	0.336667	0.346566	0.356465	0.366364	0.376263	0.386162	0.396061	0.40596	0.415859	0.425758	0.435657	0.445556	0.455455	0.465354	0.475253
Admixture proportion	0	0.818356	0.818356	0.818356	0.818356	0.818356	0.818356	0.818356	0.818356	0.818356	0.818356	0.818356	0.818356	0.818356	0.818356	0.818356	0.818356	0.818356	0.818356	0.818356	0.818356	0.818356	0.818356	0.818356	0.818356	0.818356	0.818356	0.818356	0.818356	0.818356	0.818356	0.818356	0.818356	0.818356	0.818356	0.818356	0.818356	0.818356	0.818356	0.818356	0.818356	0.818356	0.818356	0.818356	0.818356	0.818356	0.818356	0.818356	0.818356
	0.0010101	0.829001	0.829226	0.829453	0.82968	0.829908	0.830138	0.830368	0.8306	0.830832	0.831066	0.831301	0.831536	0.831773	0.832011	0.83225	0.832489	0.83273	0.832972	0.833214	0.833458	0.833703	0.833948	0.834194	0.834442	0.83469	0.834939	0.835189	0.83544	0.835691	0.835944	0.836197	0.836452	0.836707	0.836963	0.837219	0.837477	0.837735	0.837994	0.838254	0.838515	0.838776	0.839039	0.839302	0.839565	0.83983	0.840095	0.840361	0.840628
	0.0020202	0.839649	0.840099	0.840552	0.841006	0.841463	0.841922	0.842383	0.842846	0.843312	0.843779	0.844249	0.84472	0.845194	0.845669	0.846147	0.846626	0.847108	0.847591	0.848077	0.848564	0.849053	0.849544	0.850037	0.850532	0.851028	0.851526	0.852026	0.852528	0.853032	0.853537	0.854044	0.854552	0.855063	0.855575	0.856088	0.856603	0.85712	0.857638	0.858158	0.85868	0.859203	0.859727	0.860254	0.860781	0.86131	0.861841	0.862373	0.862906
	0.0030303	0.8503	0.850975	0.851654	0.852336	0.853021	0.853709	0.854401	0.855096	0.855794	0.856496	0.8572	0.857907	0.858618	0.859332	0.860048	0.860767	0.86149	0.862215	0.862943	0.863674	0.864408	0.865145	0.865884	0.866626	0.867371	0.868119	0.868869	0.869622	0.870377	0.871135	0.871896	0.872659	0.873424	0.874192	0.874963	0.875736	0.876511	0.877289	0.878069	0.878851	0.879636	0.880423	0.881212	0.882004	0.882797	0.883593	0.884392	0.885192
	0.0040404	0.860953	0.861853	0.862759	0.863668	0.864582	0.8655	0.866423	0.867349	0.86828	0.869216	0.870155	0.871098	0.872046	0.872997	0.873953	0.874912	0.875876	0.876843	0.877814	0.878789	0.879768	0.88075	0.881736	0.882726	0.883719	0.884716	0.885716	0.88672	0.887728	0.888738	0.889753	0.89077	0.891791	0.892816	0.893843	0.894874	0.895908	0.896945	0.897985	0.899029	0.900075	0.901125	0.902178	0.903233	0.904292	0.905353	0.906418	0.907485
	0.00505051	0.871609	0.872735	0.873866	0.875003	0.876146	0.877294	0.878447	0.879606	0.88077	0.881939	0.883113	0.884293	0.885478	0.886667	0.887862	0.889061	0.890266	0.891475	0.892689	0.893908	0.895132	0.89636	0.897592	0.89883	0.900072	0.901318	0.902569	0.903824	0.905083	0.906347	0.907615	0.908888	0.910164	0.911445	0.912729	0.914018	0.915311	0.916608	0.917908	0.919213	0.920521	0.921834	0.92315	0.92447	0.925793	0.92712	0.928451	0.929786
	0.00606061	0.882268	0.883619	0.884977	0.886342	0.887713	0.889091	0.890475	0.891866	0.893263	0.894666	0.896075	0.897491	0.898913	0.900341	0.901775	0.903214	0.90466	0.906111	0.907568	0.909031	0.9105	0.911974	0.913454	0.914939	0.916429	0.917925	0.919426	0.920933	0.922444	0.923961	0.925483	0.92701	0.928542	0.930079	0.931621	0.933168	0.93472	0.936276	0.937838	0.939403	0.940974	0.942549	0.944129	0.945713	0.947301	0.948894	0.950492	0.952093
	0.00707071	0.892929	0.894506	0.896091	0.897683	0.899283	0.900891	0.902506	0.904129	0.905759	0.907396	0.909041	0.910693	0.912352	0.914018	0.915691	0.917371	0.919058	0.920752	0.922452	0.924159	0.925873	0.927593	0.929319	0.931052	0.932791	0.934537	0.936289	0.938047	0.939811	0.941581	0.943357	0.945139	0.946926	0.94872	0.950519	0.952324	0.954135	0.955951	0.957773	0.9596	0.961433	0.963271	0.965114	0.966963	0.968817	0.970675	0.972539	0.974409
	0.00808081	0.903594	0.905396	0.907207	0.909027	0.910856	0.912694	0.91454	0.916395	0.918258	0.92013	0.92201	0.923898	0.925795	0.927699	0.929612	0.931532	0.93346	0.935396	0.93734	0.939291	0.94125	0.943216	0.945189	0.94717	0.949158	0.951154	0.953156	0.955166	0.957182	0.959205	0.961236	0.963272	0.965316	0.967366	0.969423	0.971486	0.973556	0.975632	0.977715	0.979803	0.981898	0.983999	0.986106	0.98822	0.990339	0.992464	0.994595	0.996731
	0.00909091	0.914261	0.916289	0.918327	0.920375	0.922433	0.9245	0.926578	0.928665	0.930761	0.932867	0.934983	0.937107	0.939241	0.941384	0.943536	0.945697	0.947866	0.950045	0.952232	0.954427	0.956631	0.958844	0.961064	0.963293	0.96553	0.967775	0.970029	0.97229	0.974559	0.976835	0.97912	0.981412	0.983711	0.986018	0.988333	0.990654	0.992983	0.99532	0.997663	1.00001	1.00237	1.00473	1.00711	1.00948	1.01187	1.01426	1.01666	1.01906
	0.010101	0.924931	0.927184	0.929449	0.931725	0.934012	0.93631	0.938618	0.940938	0.943268	0.945608	0.947959	0.95032	0.952691	0.955073	0.957464	0.959866	0.962277	0.964697	0.967128	0.969568	0.972017	0.974476	0.976944	0.979421	0.981907	0.984402	0.986906	0.989419	0.99194	0.994471	0.997009	0.999557	1.00211	1.00468	1.00725	1.00983	1.01242	1.01501	1.01762	1.02023	1.02285	1.02548	1.02811	1.03075	1.0334	1.03606	1.03873	1.0414
	0.0111111	0.935604	0.938083	0.940575	0.943078	0.945594	0.948122	0.950662	0.953214	0.955778	0.958352	0.960939	0.963536	0.966145	0.968765	0.971396	0.974038	0.976691	0.979354	0.982028	0.984713	0.987408	0.990113	0.992828	0.995553	0.998288	1.00103	1.00379	1.00655	1.00933	1.01211	1.0149	1.01771	1.02052	1.02334	1.02617	1.02901	1.03186	1.03471	1.03758	1.04045	1.04333	1.04622	1.04912	1.05203	1.05495	1.05787	1.0608	1.06374
	0.0121212	0.946279	0.948984	0.951703	0.954435	0.95718	0.959938	0.96271	0.965494	0.968291	0.9711	0.973922	0.976756	0.979603	0.982462	0.985332	0.988215	0.991109	0.994015	0.996933	0.999862	1.0028	1.00575	1.00872	1.01169	1.01467	1.01767	1.02068	1.02369	1.02672	1.02976	1.0328	1.03586	1.03893	1.04201	1.0451	1.04819	1.0513	1.05442	1.05754	1.06068	1.06383	1.06698	1.07014	1.07332	1.0765	1.07969	1.08289	1.08609
	0.0131313	0.956957	0.959888	0.962834	0.965794	0.968769	0.971757	0.97476	0.977777	0.980807	0.983851	0.986909	0.98998	0.993064	0.996162	0.999272	1.0024	1.00553	1.00868	1.01184	1.01502	1.0182	1.0214	1.02461	1.02783	1.03107	1.03431	1.03757	1.04084	1.04412	1.04741	1.05071	1.05402	1.05735	1.06068	1.06403	1.06739	1.07075	1.07413	1.07752	1.08092	1.08432	1.08774	1.09117	1.09461	1.09805	1.10151	1.10498	1.10845
	0.0141414	0.967638	0.970795	0.973968	0.977156	0.98036	0.983579	0.986814	0.990063	0.993327	0.996606	0.999899	1.00321	1.00653	1.00987	1.01322	1.01658	1.01996	1.02335	1.02676	1.03017	1.03361	1.03705	1.04051	1.04398	1.04746	1.05096	1.05447	1.05799	1.06152	1.06506	1.06862	1.07219	1.07577	1.07936	1.08297	1.08658	1.09021	1.09385	1.0975	1.10116	1.10483	1.10851	1.1122	1.11591	1.11962	1.12334	1.12708	1.13082
	0.0151515	0.978322	0.981705	0.985105	0.988522	0.991955	0.995405	0.99887	1.00235	1.00585	1.00936	1.01289	1.01644	1.02	1.02357	1.02716	1.03077	1.03439	1.03802	1.04167	1.04534	1.04901	1.0527	1.05641	1.06013	1.06386	1.06761	1.07137	1.07514	1.07893	1.08273	1.08654	1.09036	1.0942	1.09805	1.10191	1.10579	1.10967	1.11357	1.11748	1.12141	1.12534	1.12928	1.13324	1.13721	1.14119	1.14518	1.14918	1.15319
	0.0161616	0.989009	0.992618	0.996245	0.99989	1.00355	1.00723	1.01093	1.01465	1.01838	1.02213	1.02589	1.02967	1.03347	1.03729	1.04112	1.04496	1.04882	1.0527	1.05659	1.0605	1.06443	1.06836	1.07232	1.07629	1.08027	1.08426	1.08828	1.0923	1.09634	1.10039	1.10446	1.10854	1.11264	1.11674	1.12086	1.125	1.12914	1.1333	1.13748	1.14166	1.14586	1.15007	1.15429	1.15852	1.16277	1.16703	1.1713	1.17558
	0.0171717	0.999698	1.00353	1.00739	1.01126	1.01515	1.01906	1.02299	1.02694	1.03091	1.03489	1.03889	1.04291	1.04695	1.051	1.05507	1.05916	1.06326	1.06738	1.07152	1.07567	1.07984	1.08403	1.08823	1.09245	1.09668	1.10093	1.10519	1.10947	1.11376	1.11807	1.12239	1.12672	1.13108	1.13544	1.13982	1.14421	1.14862	1.15304	1.15747	1.16192	1.16638	1.17085	1.17534	1.17984	1.18435	1.18888	1.19342	1.19796
	0.0181818	1.01039	1.01445	1.01853	1.02264	1.02676	1.0309	1.03506	1.03924	1.04344	1.04766	1.0519	1.05615	1.06043	1.06472	1.06903	1.07336	1.07771	1.08207	1.08645	1.09085	1.09526	1.0997	1.10415	1.10861	1.11309	1.11759	1.12211	1.12664	1.13118	1.13574	1.14032	1.14491	1.14952	1.15414	1.15878	1.16343	1.1681	1.17278	1.17748	1.18219	1.18691	1.19165	1.1964	1.20117	1.20595	1.21074	1.21554	1.22036
	0.0191919	1.02109	1.02537	1.02968	1.03401	1.03836	1.04274	1.04713	1.05154	1.05598	1.06043	1.0649	1.0694	1.07391	1.07844	1.08299	1.08756	1.09215	1.09676	1.10138	1.10603	1.11069	1.11537	1.12007	1.12478	1.12951	1.13426	1.13903	1.14381	1.14861	1.15343	1.15826	1.16311	1.16797	1.17285	1.17775	1.18266	1.18759	1.19253	1.19749	1.20246	1.20745	1.21245	1.21747	1.2225	1.22754	1.2326	1.23768	1.24276
	0.020202	1.03178	1.0363	1.04083	1.04539	1.04997	1.05458	1.0592	1.06385	1.06852	1.07321	1.07792	1.08265	1.0874	1.09217	1.09696	1.10177	1.1066	1.11145	1.11632	1.12121	1.12612	1.13105	1.13599	1.14096	1.14594	1.15094	1.15596	1.16099	1.16605	1.17112	1.1762	1.18131	1.18643	1.19157	1.19672	1.2019	1.20708	1.21229	1.21751	1.22274	1.22799	1.23326	1.23854	1.24384	1.24915	1.25448	1.25982	1.26518
	0.0212121	1.04248	1.04722	1.05199	1.05678	1.06159	1.06642	1.07128	1.07616	1.08106	1.08599	1.09093	1.0959	1.10089	1.1059	1.11093	1.11598	1.12106	1.12615	1.13127	1.1364	1.14156	1.14673	1.15192	1.15714	1.16237	1.16762	1.17289	1.17818	1.18348	1.18881	1.19415	1.19951	1.20489	1.21029	1.2157	1.22114	1.22658	1.23205	1.23753	1.24303	1.24854	1.25407	1.25962	1.26519	1.27076	1.27636	1.28197	1.28759
	0.0222222	1.05319	1.05815	1.06315	1.06816	1.0732	1.07827	1.08336	1.08847	1.09361	1.09877	1.10395	1.10916	1.11438	1.11963	1.12491	1.1302	1.13552	1.14085	1.14621	1.15159	1.15699	1.16242	1.16786	1.17332	1.1788	1.1843	1.18983	1.19537	1.20093	1.20651	1.21211	1.21773	1.22336	1.22902	1.23469	1.24038	1.24609	1.25182	1.25756	1.26332	1.2691	1.2749	1.28071	1.28654	1.29238	1.29825	1.30413	1.31002
	0.0232323	1.06389	1.06909	1.07431	1.07955	1.08482	1.09012	1.09544	1.10079	1.10616	1.11155	1.11697	1.12242	1.12788	1.13337	1.13889	1.14442	1.14998	1.15556	1.16117	1.16679	1.17244	1.17811	1.1838	1.18951	1.19524	1.201	1.20677	1.21256	1.21838	1.22421	1.23007	1.23594	1.24184	1.24775	1.25368	1.25963	1.2656	1.27159	1.2776	1.28362	1.28966	1.29572	1.3018	1.3079	1.31401	1.32014	1.32629	1.33245
	0.0242424	1.0746	1.08002	1.08547	1.09094	1.09645	1.10197	1.10753	1.11311	1.11871	1.12434	1.13	1.13568	1.14138	1.14711	1.15287	1.15865	1.16445	1.17027	1.17612	1.18199	1.18789	1.1938	1.19974	1.2057	1.21169	1.21769	1.22372	1.22976	1.23583	1.24192	1.24803	1.25416	1.26032	1.26649	1.27268	1.27889	1.28512	1.29137	1.29764	1.30393	1.31023	1.31656	1.3229	1.32927	1.33565	1.34204	1.34846	1.35489
	0.0252525	1.08531	1.09096	1.09664	1.10234	1.10807	1.11383	1.11962	1.12543	1.13127	1.13714	1.14303	1.14895	1.15489	1.16086	1.16686	1.17287	1.17892	1.18499	1.19108	1.1972	1.20334	1.2095	1.21569	1.2219	1.22814	1.23439	1.24067	1.24697	1.25329	1.25964	1.266	1.27239	1.2788	1.28523	1.29168	1.29815	1.30464	1.31116	1.31769	1.32424	1.33081	1.3374	1.34401	1.35064	1.35729	1.36395	1.37064	1.37734
	0.0262626	1.09603	1.1019	1.10781	1.11374	1.1197	1.12569	1.13171	1.13776	1.14383	1.14993	1.15606	1.16222	1.1684	1.17461	1.18085	1.18711	1.19339	1.19971	1.20605	1.21241	1.2188	1.22521	1.23164	1.2381	1.24459	1.2511	1.25763	1.26418	1.27076	1.27736	1.28398	1.29063	1.29729	1.30398	1.31069	1.31742	1.32418	1.33095	1.33774	1.34456	1.35139	1.35825	1.36513	1.37202	1.37894	1.38587	1.39282	1.3998
	0.0272727	1.10674	1.11285	1.11898	1.12514	1.13133	1.13755	1.14381	1.15009	1.15639	1.16273	1.1691	1.17549	1.18191	1.18836	1.19484	1.20134	1.20787	1.21443	1.22101	1.22762	1.23426	1.24092	1.2476	1.25431	1.26105	1.26781	1.27459	1.2814	1.28823	1.29509	1.30196	1.30887	1.31579	1.32274	1.32971	1.3367	1.34371	1.35075	1.35781	1.36488	1.37198	1.3791	1.38625	1.39341	1.40059	1.40779	1.41502	1.42226
	0.0282828	1.11746	1.12379	1.13015	1.13654	1.14297	1.14942	1.1559	1.16242	1.16896	1.17554	1.18214	1.18877	1.19543	1.20212	1.20884	1.21558	1.22236	1.22916	1.23599	1.24284	1.24972	1.25663	1.26357	1.27053	1.27751	1.28452	1.29156	1.29862	1.30571	1.31282	1.31995	1.32711	1.33429	1.3415	1.34873	1.35598	1.36325	1.37055	1.37787	1.38522	1.39258	1.39997	1.40737	1.4148	1.42225	1.42972	1.43722	1.44473
	0.0292929	1.12819	1.13474	1.14133	1.14795	1.1546	1.16129	1.16801	1.17475	1.18153	1.18834	1.19518	1.20205	1.20895	1.21588	1.22284	1.22983	1.23685	1.24389	1.25096	1.25806	1.26519	1.27235	1.27953	1.28674	1.29398	1.30124	1.30853	1.31585	1.32319	1.33055	1.33794	1.34536	1.3528	1.36027	1.36775	1.37527	1.3828	1.39036	1.39795	1.40555	1.41318	1.42083	1.42851	1.4362	1.44392	1.45166	1.45942	1.46721
	0.030303	1.13891	1.1457	1.15251	1.15936	1.16625	1.17316	1.18011	1.18709	1.19411	1.20115	1.20823	1.21534	1.22248	1.22965	1.23685	1.24408	1.25134	1.25863	1.26594	1.27329	1.28067	1.28807	1.2955	1.30297	1.31045	1.31797	1.32551	1.33308	1.34067	1.34829	1.35594	1.36362	1.37131	1.37904	1.38679	1.39456	1.40236	1.41018	1.41803	1.4259	1.43379	1.44171	1.44965	1.45761	1.4656	1.47361	1.48164	1.48969
	0.0313131	1.14964	1.15665	1.1637	1.17078	1.17789	1.18504	1.19222	1.19944	1.20668	1.21397	1.22128	1.22863	1.23601	1.24342	1.25086	1.25833	1.26583	1.27337	1.28093	1.28852	1.29615	1.3038	1.31148	1.31919	1.32693	1.3347	1.34249	1.35032	1.35817	1.36604	1.37395	1.38188	1.38983	1.39782	1.40583	1.41386	1.42192	1.43001	1.43811	1.44625	1.45441	1.46259	1.4708	1.47903	1.48728	1.49556	1.50386	1.51218
	0.0323232	1.16037	1.16761	1.17488	1.18219	1.18954	1.19692	1.20433	1.21178	1.21927	1.22678	1.23434	1.24192	1.24954	1.25719	1.26487	1.27259	1.28033	1.28811	1.29592	1.30376	1.31163	1.31953	1.32746	1.33542	1.34341	1.35143	1.35948	1.36756	1.37566	1.38379	1.39196	1.40014	1.40836	1.4166	1.42487	1.43317	1.44149	1.44983	1.45821	1.46661	1.47503	1.48348	1.49195	1.50045	1.50897	1.51752	1.52609	1.53468
	0.0333333	1.17111	1.17857	1.18607	1.19361	1.20119	1.2088	1.21645	1.22413	1.23185	1.2396	1.24739	1.25522	1.26307	1.27097	1.27889	1.28685	1.29484	1.30286	1.31091	1.319	1.32712	1.33527	1.34345	1.35166	1.3599	1.36817	1.37647	1.3848	1.39316	1.40155	1.40997	1.41842	1.42689	1.43539	1.44392	1.45248	1.46106	1.46967	1.47831	1.48697	1.49566	1.50438	1.51312	1.52188	1.53067	1.53949	1.54833	1.55719
	0.0343434	1.18184	1.18954	1.19727	1.20503	1.21284	1.22068	1.22857	1.23648	1.24444	1.25243	1.26046	1.26852	1.27661	1.28475	1.29291	1.30111	1.30935	1.31761	1.32591	1.33425	1.34261	1.35101	1.35944	1.3679	1.37639	1.38492	1.39347	1.40206	1.41067	1.41932	1.42799	1.43669	1.44543	1.45419	1.46298	1.47179	1.48064	1.48951	1.49841	1.50734	1.5163	1.52528	1.53428	1.54332	1.55238	1.56146	1.57057	1.57971
	0.0353535	1.19258	1.2005	1.20846	1.21646	1.2245	1.23257	1.24069	1.24884	1.25703	1.26526	1.27352	1.28182	1.29016	1.29853	1.30694	1.31538	1.32386	1.33237	1.34092	1.3495	1.35811	1.36676	1.37544	1.38415	1.39289	1.40167	1.41048	1.41931	1.42818	1.43709	1.44602	1.45498	1.46397	1.47299	1.48204	1.49112	1.50023	1.50936	1.51853	1.52772	1.53694	1.54619	1.55546	1.56476	1.57409	1.58344	1.59282	1.60223
	0.0363636	1.20333	1.21147	1.21966	1.22789	1.23616	1.24447	1.25281	1.2612	1.26962	1.27809	1.28659	1.29513	1.3037	1.31232	1.32097	1.32965	1.33837	1.34713	1.35592	1.36475	1.37361	1.38251	1.39144	1.4004	1.40939	1.41842	1.42748	1.43658	1.4457	1.45486	1.46405	1.47327	1.48252	1.4918	1.50111	1.51045	1.51982	1.52922	1.53865	1.5481	1.55759	1.5671	1.57664	1.58621	1.59581	1.60543	1.61508	1.62476
	0.0373737	1.21407	1.22245	1.23086	1.23932	1.24782	1.25636	1.26494	1.27356	1.28222	1.29092	1.29966	1.30844	1.31726	1.32611	1.335	1.34393	1.35289	1.3619	1.37093	1.38001	1.38912	1.39826	1.40744	1.41665	1.4259	1.43518	1.4445	1.45385	1.46323	1.47264	1.48208	1.49156	1.50107	1.51061	1.52018	1.52978	1.53942	1.54908	1.55877	1.56849	1.57824	1.58802	1.59783	1.60767	1.61753	1.62743	1.63735	1.6473
	0.0383838	1.22482	1.23342	1.24207	1.25075	1.25949	1.26826	1.27707	1.28593	1.29482	1.30376	1.31274	1.32175	1.33081	1.33991	1.34904	1.35821	1.36742	1.37667	1.38595	1.39527	1.40463	1.41402	1.42345	1.43291	1.44241	1.45195	1.46152	1.47112	1.48075	1.49042	1.50013	1.50986	1.51963	1.52943	1.53926	1.54913	1.55902	1.56895	1.5789	1.58889	1.59891	1.60895	1.61903	1.62913	1.63927	1.64943	1.65962	1.66984
	0.0393939	1.23557	1.2444	1.25327	1.26219	1.27115	1.28016	1.28921	1.2983	1.30743	1.3166	1.32582	1.33507	1.34437	1.3537	1.36308	1.37249	1.38195	1.39144	1.40097	1.41054	1.42014	1.42978	1.43946	1.44918	1.45893	1.46872	1.47854	1.4884	1.49829	1.50821	1.51817	1.52817	1.53819	1.54825	1.55835	1.56847	1.57863	1.58882	1.59904	1.60929	1.61957	1.62989	1.64023	1.6506	1.66101	1.67144	1.6819	1.69239
	0.040404	1.24632	1.25538	1.26448	1.27363	1.28283	1.29206	1.30135	1.31067	1.32004	1.32945	1.3389	1.3484	1.35793	1.36751	1.37713	1.38678	1.39648	1.40622	1.41599	1.42581	1.43566	1.44555	1.45548	1.46545	1.47545	1.48549	1.49557	1.50568	1.51583	1.52601	1.53623	1.54648	1.55677	1.56709	1.57744	1.58783	1.59825	1.6087	1.61918	1.6297	1.64025	1.65083	1.66144	1.67208	1.68275	1.69346	1.70419	1.71495
	0.0414141	1.25708	1.26637	1.2757	1.28508	1.2945	1.30397	1.31349	1.32305	1.33265	1.3423	1.35199	1.36172	1.3715	1.38132	1.39117	1.40108	1.41102	1.421	1.43102	1.44108	1.45119	1.46133	1.47151	1.48172	1.49198	1.50227	1.5126	1.52297	1.53337	1.54381	1.55429	1.5648	1.57534	1.58592	1.59654	1.60719	1.61787	1.62859	1.63933	1.65012	1.66093	1.67178	1.68266	1.69357	1.70451	1.71548	1.72649	1.73752
	0.0424242	1.26784	1.27735	1.28691	1.29652	1.30618	1.31588	1.32563	1.33543	1.34527	1.35515	1.36508	1.37505	1.38507	1.39513	1.40523	1.41537	1.42556	1.43579	1.44606	1.45637	1.46671	1.4771	1.48753	1.498	1.50851	1.51906	1.52964	1.54026	1.55092	1.56162	1.57235	1.58312	1.59392	1.60477	1.61564	1.62655	1.6375	1.64848	1.65949	1.67054	1.68162	1.69273	1.70388	1.71506	1.72627	1.73751	1.74879	1.76009
	0.0434343	1.2786	1.28834	1.29813	1.30797	1.31786	1.3278	1.33778	1.34781	1.35788	1.36801	1.37817	1.38838	1.39864	1.40894	1.41929	1.42967	1.4401	1.45058	1.46109	1.47165	1.48225	1.49289	1.50357	1.51429	1.52505	1.53585	1.54668	1.55756	1.56848	1.57943	1.59042	1.60145	1.61251	1.62361	1.63475	1.64592	1.65713	1.66838	1.67966	1.69097	1.70232	1.7137	1.72511	1.73656	1.74804	1.75955	1.7711	1.78268
	0.0444444	1.28937	1.29934	1.30936	1.31943	1.32955	1.33971	1.34993	1.36019	1.37051	1.38086	1.39127	1.40172	1.41222	1.42276	1.43335	1.44398	1.45465	1.46537	1.47613	1.48694	1.49779	1.50867	1.5196	1.53058	1.54159	1.55264	1.56373	1.57487	1.58604	1.59725	1.60849	1.61978	1.63111	1.64247	1.65387	1.6653	1.67677	1.68828	1.69982	1.7114	1.72302	1.73467	1.74635	1.75806	1.76981	1.7816	1.79342	1.80526
	0.0454545	1.30013	1.31033	1.32058	1.33088	1.34123	1.35163	1.36208	1.37258	1.38313	1.39373	1.40437	1.41506	1.4258	1.43658	1.44741	1.45829	1.46921	1.48017	1.49118	1.50223	1.51333	1.52447	1.53565	1.54687	1.55813	1.56944	1.58079	1.59217	1.6036	1.61507	1.62658	1.63812	1.64971	1.66133	1.67299	1.68469	1.69642	1.70819	1.72	1.73185	1.74373	1.75564	1.76759	1.77958	1.7916	1.80365	1.81574	1.82786
	0.0464646	1.3109	1.32133	1.33181	1.34234	1.35292	1.36356	1.37424	1.38498	1.39576	1.40659	1.41748	1.42841	1.43938	1.45041	1.46148	1.4726	1.48376	1.49497	1.50623	1.51753	1.52887	1.54026	1.55169	1.56317	1.57469	1.58624	1.59785	1.60949	1.62117	1.6329	1.64466	1.65647	1.66831	1.68019	1.69212	1.70408	1.71607	1.72811	1.74018	1.75229	1.76444	1.77662	1.78884	1.8011	1.81339	1.82571	1.83807	1.85047
	0.0474747	1.32168	1.33233	1.34304	1.3538	1.36462	1.37548	1.3864	1.39737	1.40839	1.41946	1.43058	1.44175	1.45297	1.46424	1.47555	1.48692	1.49833	1.50978	1.52128	1.53283	1.54442	1.55606	1.56775	1.57947	1.59124	1.60305	1.61491	1.62681	1.63875	1.65073	1.66275	1.67482	1.68692	1.69907	1.71125	1.72347	1.73573	1.74803	1.76037	1.77275	1.78516	1.79761	1.8101	1.82262	1.83518	1.84778	1.86041	1.87308
	0.0484848	1.33245	1.34334	1.35428	1.36527	1.37631	1.38741	1.39857	1.40977	1.42103	1.43234	1.4437	1.45511	1.46656	1.47807	1.48963	1.50124	1.51289	1.52459	1.53634	1.54814	1.55998	1.57187	1.5838	1.59578	1.6078	1.61987	1.63198	1.64413	1.65633	1.66857	1.68085	1.69317	1.70554	1.71794	1.73039	1.74287	1.7554	1.76796	1.78057	1.79321	1.80589	1.81861	1.83137	1.84416	1.85699	1.86986	1.88276	1.8957
	0.0494949	1.34323	1.35434	1.36551	1.37674	1.38801	1.39935	1.41073	1.42217	1.43367	1.44521	1.45681	1.46846	1.48016	1.49191	1.50371	1.51556	1.52746	1.53941	1.55141	1.56345	1.57554	1.58768	1.59986	1.61209	1.62437	1.63669	1.64905	1.66146	1.67392	1.68641	1.69895	1.71154	1.72416	1.73683	1.74953	1.76228	1.77507	1.7879	1.80077	1.81368	1.82663	1.83961	1.85264	1.8657	1.8788	1.89194	1.90511	1.91832
	0.0505051	1.35401	1.36536	1.37675	1.38821	1.39972	1.41128	1.42291	1.43458	1.44631	1.45809	1.46993	1.48182	1.49376	1.50575	1.5178	1.52989	1.54204	1.55423	1.56647	1.57876	1.5911	1.60349	1.61593	1.62841	1.64094	1.65351	1.66613	1.6788	1.69151	1.70426	1.71706	1.7299	1.74279	1.75572	1.76868	1.7817	1.79475	1.80784	1.82098	1.83415	1.84737	1.86062	1.87392	1.88725	1.90062	1.91403	1.92747	1.94096
	0.0515152	1.3648	1.37637	1.388	1.39968	1.41142	1.42322	1.43508	1.44699	1.45896	1.47098	1.48305	1.49518	1.50736	1.5196	1.53189	1.54422	1.55661	1.56905	1.58154	1.59408	1.60667	1.61931	1.632	1.64473	1.65751	1.67034	1.68322	1.69614	1.70911	1.72212	1.73517	1.74828	1.76142	1.77461	1.78784	1.80112	1.81443	1.82779	1.84119	1.85463	1.86812	1.88164	1.8952	1.9088	1.92244	1.93612	1.94984	1.9636
	0.0525253	1.37559	1.38738	1.39924	1.41116	1.42313	1.43517	1.44726	1.4594	1.47161	1.48387	1.49618	1.50855	1.52097	1.53345	1.54598	1.55856	1.5712	1.58388	1.59662	1.60941	1.62225	1.63514	1.64807	1.66106	1.67409	1.68718	1.70031	1.71348	1.72671	1.73998	1.75329	1.76666	1.78006	1.79351	1.80701	1.82054	1.83412	1.84775	1.86141	1.87512	1.88887	1.90266	1.91649	1.93037	1.94428	1.95823	1.97222	1.98625
	0.0535354	1.38638	1.3984	1.41049	1.42264	1.43485	1.44711	1.45944	1.47182	1.48426	1.49676	1.50931	1.52192	1.53458	1.5473	1.56008	1.5729	1.58578	1.59872	1.6117	1.62474	1.63783	1.65096	1.66415	1.67739	1.69068	1.70402	1.7174	1.73084	1.74432	1.75784	1.77142	1.78504	1.79871	1.81242	1.82617	1.83998	1.85382	1.86771	1.88164	1.89562	1.90963	1.92369	1.93779	1.95193	1.96612	1.98034	1.9946	2.00891
	0.0545455	1.39717	1.40943	1.42174	1.43412	1.44656	1.45906	1.47162	1.48424	1.49692	1.50965	1.52244	1.53529	1.5482	1.56116	1.57418	1.58725	1.60037	1.61355	1.62679	1.64007	1.65341	1.6668	1.68024	1.69373	1.70727	1.72086	1.7345	1.74819	1.76193	1.77572	1.78955	1.80343	1.81736	1.83133	1.84535	1.85941	1.87352	1.88768	1.90187	1.91612	1.9304	1.94473	1.9591	1.97351	1.98796	2.00246	2.01699	2.03157
	0.0555556	1.40797	1.42045	1.433	1.44561	1.45828	1.47101	1.48381	1.49666	1.50958	1.52255	1.53558	1.54867	1.56182	1.57502	1.58828	1.6016	1.61497	1.62839	1.64187	1.65541	1.66899	1.68263	1.69633	1.71007	1.72387	1.73771	1.75161	1.76555	1.77955	1.79359	1.80768	1.82183	1.83601	1.85025	1.86453	1.87886	1.89323	1.90765	1.92211	1.93662	1.95118	1.96577	1.98041	1.99509	2.00982	2.02458	2.03939	2.05424
	0.0565657	1.41876	1.43148	1.44426	1.4571	1.47	1.48297	1.496	1.50909	1.52224	1.53545	1.54872	1.56205	1.57544	1.58889	1.60239	1.61595	1.62957	1.64324	1.65697	1.67075	1.68459	1.69848	1.71242	1.72642	1.74047	1.75457	1.76872	1.78292	1.79717	1.81147	1.82583	1.84023	1.85468	1.86917	1.88372	1.89831	1.91295	1.92763	1.94236	1.95714	1.97196	1.98682	2.00173	2.01668	2.03168	2.04672	2.0618	2.07692
	0.0575758	1.42957	1.44251	1.45552	1.46859	1.48173	1.49493	1.50819	1.52152	1.53491	1.54836	1.56187	1.57544	1.58907	1.60276	1.6165	1.63031	1.64417	1.65809	1.67206	1.6861	1.70018	1.71432	1.72852	1.74277	1.75707	1.77143	1.78583	1.80029	1.8148	1.82936	1.84397	1.85863	1.87334	1.8881	1.90291	1.91777	1.93267	1.94762	1.96261	1.97766	1.99275	2.00788	2.02306	2.03828	2.05355	2.06886	2.08421	2.09961
	0.0585859	1.44037	1.45354	1.46678	1.48009	1.49346	1.50689	1.52039	1.53395	1.54758	1.56126	1.57501	1.58883	1.6027	1.61663	1.63062	1.64467	1.65878	1.67294	1.68717	1.70145	1.71578	1.73017	1.74462	1.75912	1.77368	1.78829	1.80295	1.81767	1.83244	1.84725	1.86213	1.87705	1.89202	1.90704	1.92211	1.93723	1.9524	1.96761	1.98287	1.99818	2.01354	2.02894	2.04439	2.05988	2.07542	2.09101	2.10663	2.1223
	0.059596	1.45118	1.46458	1.47805	1.49158	1.50519	1.51886	1.53259	1.54639	1.56025	1.57418	1.58817	1.60222	1.61633	1.6305	1.64474	1.65903	1.67339	1.6878	1.70227	1.7168	1.73139	1.74603	1.76073	1.77548	1.79029	1.80516	1.82008	1.83505	1.85008	1.86515	1.88028	1.89546	1.9107	1.92598	1.94131	1.9567	1.97213	1.98761	2.00314	2.01872	2.03434	2.05001	2.06573	2.0815	2.09731	2.11316	2.12906	2.145
	0.0606061	1.46199	1.47562	1.48932	1.50309	1.51692	1.53082	1.54479	1.55883	1.57293	1.58709	1.60132	1.61561	1.62997	1.64439	1.65886	1.6734	1.688	1.70266	1.71738	1.73216	1.747	1.76189	1.77684	1.79185	1.80691	1.82203	1.83721	1.85244	1.86772	1.88306	1.89845	1.91389	1.92938	1.94493	1.96053	1.97617	1.99187	2.00762	2.02341	2.03926	2.05515	2.07109	2.08708	2.10311	2.1192	2.13532	2.1515	2.16771
	0.0616162	1.4728	1.48666	1.50059	1.51459	1.52866	1.5428	1.557	1.57127	1.58561	1.60001	1.61448	1.62901	1.64361	1.65827	1.67299	1.68778	1.70262	1.71753	1.7325	1.74753	1.76261	1.77776	1.79296	1.80822	1.82354	1.83891	1.85434	1.86983	1.88537	1.90097	1.91662	1.93232	1.94807	1.96388	1.97974	1.99565	2.01162	2.02763	2.04369	2.0598	2.07597	2.09218	2.10843	2.12474	2.14109	2.15749	2.17394	2.19043
	0.0626263	1.48362	1.49771	1.51187	1.5261	1.5404	1.55477	1.56921	1.58372	1.59829	1.61293	1.62764	1.64242	1.65726	1.67216	1.68712	1.70215	1.71725	1.7324	1.74762	1.76289	1.77823	1.79363	1.80908	1.8246	1.84017	1.8558	1.87148	1.88723	1.90303	1.91888	1.93479	1.95075	1.96677	1.98284	1.99896	2.01514	2.03137	2.04765	2.06398	2.08036	2.09679	2.11327	2.12979	2.14637	2.163	2.17967	2.19639	2.21316
	0.0636364	1.49443	1.50875	1.52315	1.53761	1.55214	1.56675	1.58142	1.59617	1.61098	1.62586	1.64081	1.65582	1.6709	1.68605	1.70126	1.71654	1.73187	1.74728	1.76274	1.77827	1.79385	1.8095	1.82521	1.84098	1.8568	1.87269	1.88863	1.90463	1.92069	1.9368	1.95297	1.96919	1.98547	2.00181	2.01819	2.03463	2.05113	2.06767	2.08427	2.10092	2.11762	2.13436	2.15116	2.16801	2.18491	2.20185	2.21885	2.23589
	0.0646465	1.50526	1.5198	1.53443	1.54912	1.56389	1.57873	1.59364	1.60862	1.62367	1.63879	1.65398	1.66923	1.68456	1.69995	1.7154	1.73092	1.74651	1.76216	1.77787	1.79364	1.80948	1.82538	1.84134	1.85736	1.87344	1.88958	1.90578	1.92204	1.93835	1.95473	1.97116	1.98764	2.00418	2.02078	2.03743	2.05413	2.07089	2.0877	2.10457	2.12148	2.13845	2.15547	2.17254	2.18966	2.20683	2.22405	2.24131	2.25863
	0.0656566	1.51608	1.53086	1.54571	1.56064	1.57564	1.59071	1.60586	1.62108	1.63637	1.65172	1.66715	1.68265	1.69821	1.71385	1.72955	1.74531	1.76114	1.77704	1.793	1.80903	1.82511	1.84126	1.85748	1.87375	1.89009	1.90648	1.92294	1.93945	1.95603	1.97266	1.98935	2.00609	2.0229	2.03975	2.05667	2.07364	2.09066	2.10774	2.12487	2.14206	2.15929	2.17658	2.19392	2.21131	2.22875	2.24624	2.26378	2.28137
	0.0666667	1.52691	1.54192	1.557	1.57216	1.58739	1.6027	1.61808	1.63354	1.64906	1.66466	1.68033	1.69607	1.71187	1.72775	1.74369	1.75971	1.77578	1.79193	1.80814	1.82441	1.84075	1.85715	1.87362	1.89015	1.90674	1.92339	1.9401	1.95687	1.9737	1.99059	2.00754	2.02455	2.04162	2.05874	2.07592	2.09315	2.11044	2.12778	2.14518	2.16263	2.18014	2.1977	2.21531	2.23297	2.25069	2.26845	2.28626	2.30413
	0.0676768	1.53774	1.55297	1.56829	1.58368	1.59915	1.61469	1.63031	1.646	1.66177	1.6776	1.69351	1.70949	1.72554	1.74166	1.75785	1.7741	1.79043	1.80682	1.82328	1.8398	1.85639	1.87305	1.88976	1.90655	1.92339	1.9403	1.95727	1.9743	1.99139	2.00854	2.02575	2.04301	2.06034	2.07773	2.09517	2.11267	2.13022	2.14783	2.1655	2.18322	2.201	2.21882	2.23671	2.25464	2.27263	2.29066	2.30875	2.32689
	0.0686869	1.54857	1.56404	1.57958	1.59521	1.61091	1.62669	1.64254	1.65847	1.67447	1.69055	1.70669	1.72292	1.73921	1.75557	1.772	1.78851	1.80508	1.82172	1.83842	1.8552	1.87204	1.88894	1.90591	1.92295	1.94005	1.95721	1.97444	1.99172	2.00907	2.02648	2.04395	2.06148	2.07907	2.09672	2.11443	2.13219	2.15001	2.16789	2.18582	2.20381	2.22186	2.23996	2.25811	2.27631	2.29457	2.31288	2.33125	2.34966
	0.069697	1.5594	1.5751	1.59088	1.60674	1.62267	1.63868	1.65477	1.67094	1.68718	1.70349	1.71988	1.73634	1.75288	1.76949	1.78616	1.80291	1.81973	1.83662	1.85357	1.8706	1.88769	1.90485	1.92207	1.93936	1.95671	1.97413	1.99161	2.00916	2.02677	2.04444	2.06217	2.07996	2.09781	2.11572	2.13369	2.15172	2.16981	2.18795	2.20615	2.22441	2.24273	2.26109	2.27952	2.298	2.31653	2.33511	2.35375	2.37244
	0.0707071	1.57024	1.58617	1.60218	1.61827	1.63444	1.65069	1.66701	1.68341	1.69989	1.71644	1.73307	1.74978	1.76655	1.78341	1.80033	1.81732	1.83439	1.85152	1.86873	1.886	1.90334	1.92075	1.93823	1.95577	1.97338	1.99106	2.0088	2.0266	2.04447	2.06239	2.08039	2.09844	2.11655	2.13473	2.15296	2.17126	2.18961	2.20802	2.22649	2.24502	2.2636	2.28224	2.30093	2.31968	2.33849	2.35735	2.37626	2.39522
	0.0717172	1.58108	1.59724	1.61348	1.6298	1.64621	1.66269	1.67925	1.69589	1.71261	1.7294	1.74627	1.76321	1.78023	1.79733	1.8145	1.83174	1.84905	1.86643	1.88388	1.90141	1.919	1.93666	1.95439	1.97219	1.99006	2.00799	2.02598	2.04404	2.06217	2.08036	2.09861	2.11693	2.1353	2.15374	2.17224	2.1908	2.20942	2.2281	2.24683	2.26563	2.28448	2.30339	2.32236	2.34138	2.36046	2.37959	2.39878	2.41802
	0.0727273	1.59193	1.60832	1.62479	1.64134	1.65798	1.6747	1.69149	1.70837	1.72532	1.74236	1.75947	1.77666	1.79392	1.81126	1.82867	1.84615	1.86371	1.88134	1.89905	1.91682	1.93467	1.95258	1.97056	1.98862	2.00673	2.02492	2.04317	2.06149	2.07988	2.09833	2.11684	2.13542	2.15406	2.17276	2.19152	2.21035	2.22923	2.24818	2.26718	2.28625	2.30537	2.32455	2.34379	2.36308	2.38243	2.40184	2.4213	2.44082
	0.0737374	1.60278	1.61939	1.6361	1.65288	1.66975	1.68671	1.70374	1.72085	1.73805	1.75532	1.77267	1.7901	1.80761	1.82519	1.84284	1.86058	1.87838	1.89626	1.91421	1.93224	1.95033	1.9685	1.98674	2.00504	2.02342	2.04186	2.06037	2.07895	2.09759	2.1163	2.13508	2.15391	2.17282	2.19178	2.21081	2.2299	2.24905	2.26827	2.28754	2.30687	2.32627	2.34572	2.36523	2.38479	2.40442	2.4241	2.44383	2.46363
	0.0747475	1.61362	1.63047	1.64741	1.66443	1.68153	1.69872	1.71599	1.73334	1.75077	1.76829	1.78588	1.80355	1.8213	1.83912	1.85702	1.875	1.89306	1.91118	1.92939	1.94766	1.96601	1.98443	2.00292	2.02148	2.04011	2.05881	2.07757	2.09641	2.11531	2.13428	2.15332	2.17242	2.19158	2.21081	2.23011	2.24946	2.26888	2.28836	2.3079	2.32751	2.34717	2.36689	2.38667	2.40651	2.42641	2.44636	2.46637	2.48644
	0.0757576	1.62448	1.64156	1.65872	1.67598	1.69331	1.71074	1.72824	1.74583	1.7635	1.78125	1.79909	1.817	1.83499	1.85306	1.87121	1.88943	1.90773	1.92611	1.94456	1.96309	1.98169	2.00036	2.0191	2.03791	2.0568	2.07576	2.09478	2.11388	2.13304	2.15227	2.17156	2.19093	2.21036	2.22985	2.24941	2.26903	2.28871	2.30846	2.32827	2.34814	2.36808	2.38807	2.40812	2.42823	2.44841	2.46863	2.48892	2.50926
	0.0767677	1.63533	1.65264	1.67004	1.68753	1.7051	1.72276	1.7405	1.75833	1.77623	1.79423	1.8123	1.83045	1.84869	1.867	1.8854	1.90387	1.92242	1.94104	1.95974	1.97852	1.99737	2.01629	2.03529	2.05436	2.0735	2.09271	2.11199	2.13135	2.15077	2.17026	2.18982	2.20944	2.22913	2.24889	2.26871	2.2886	2.30855	2.32857	2.34865	2.36879	2.38899	2.40926	2.42958	2.44997	2.47041	2.49091	2.51147	2.53209
	0.0777778	1.64619	1.66373	1.68136	1.69908	1.71689	1.73478	1.75276	1.77082	1.78897	1.8072	1.82552	1.84391	1.86239	1.88095	1.89959	1.91831	1.9371	1.95598	1.97493	1.99395	2.01305	2.03223	2.05148	2.07081	2.0902	2.10967	2.12921	2.14882	2.1685	2.18826	2.20807	2.22796	2.24792	2.26794	2.28803	2.30818	2.3284	2.34868	2.36903	2.38944	2.40991	2.43045	2.45105	2.4717	2.49242	2.5132	2.53404	2.55493
	0.0787879	1.65705	1.67482	1.69269	1.71064	1.72868	1.74681	1.76502	1.78332	1.80171	1.82018	1.83874	1.85738	1.8761	1.8949	1.91379	1.93275	1.95179	1.97091	1.99011	2.00939	2.02875	2.04817	2.06768	2.08726	2.10691	2.12664	2.14644	2.1663	2.18625	2.20626	2.22634	2.24649	2.26671	2.28699	2.30735	2.32777	2.34825	2.3688	2.38942	2.4101	2.43084	2.45165	2.47252	2.49345	2.51444	2.53549	2.55661	2.57778
	0.079798	1.66792	1.68592	1.70401	1.7222	1.74047	1.75884	1.77729	1.79583	1.81445	1.83317	1.85196	1.87084	1.88981	1.90886	1.92799	1.9472	1.96649	1.98586	2.00531	2.02484	2.04444	2.06412	2.08388	2.10372	2.12362	2.14361	2.16366	2.18379	2.20399	2.22426	2.24461	2.26502	2.2855	2.30605	2.32667	2.34736	2.36811	2.38893	2.40981	2.43076	2.45178	2.47286	2.494	2.5152	2.53647	2.5578	2.57918	2.60063
	0.0808081	1.67878	1.69702	1.71534	1.73376	1.75227	1.77087	1.78956	1.80833	1.8272	1.84615	1.86519	1.88431	1.90352	1.92281	1.94219	1.96165	1.98119	2.00081	2.02051	2.04028	2.06014	2.08008	2.10009	2.12018	2.14034	2.16058	2.1809	2.20128	2.22174	2.24228	2.26288	2.28356	2.3043	2.32512	2.346	2.36696	2.38798	2.40906	2.43022	2.45144	2.47272	2.49407	2.51548	2.53696	2.5585	2.5801	2.60177	2.62349
	0.0818182	1.68965	1.70812	1.72667	1.74533	1.76407	1.7829	1.80183	1.82085	1.83995	1.85914	1.87842	1.89779	1.91724	1.93678	1.9564	1.9761	1.99589	2.01576	2.03571	2.05574	2.07585	2.09604	2.1163	2.13665	2.15707	2.17756	2.19814	2.21878	2.2395	2.2603	2.28116	2.3021	2.32311	2.34419	2.36534	2.38656	2.40785	2.4292	2.45062	2.47211	2.49367	2.51529	2.53698	2.55873	2.58054	2.60242	2.62436	2.64636
	0.0828283	1.70053	1.71922	1.73801	1.7569	1.77587	1.79494	1.81411	1.83336	1.8527	1.87214	1.89166	1.91127	1.93096	1.95074	1.97061	1.99056	2.0106	2.03071	2.05091	2.07119	2.09156	2.112	2.13252	2.15312	2.17379	2.19455	2.21538	2.23628	2.25727	2.27832	2.29945	2.32065	2.34192	2.36327	2.38468	2.40617	2.42772	2.44935	2.47104	2.4928	2.51463	2.53652	2.55848	2.5805	2.60259	2.62474	2.64696	2.66924
	0.0838384	1.7114	1.73033	1.74935	1.76847	1.78768	1.80699	1.82639	1.84588	1.86546	1.88513	1.9049	1.92475	1.94469	1.96471	1.98483	2.00502	2.02531	2.04567	2.06612	2.08666	2.10727	2.12797	2.14874	2.16959	2.19053	2.21154	2.23263	2.25379	2.27503	2.29635	2.31774	2.3392	2.36074	2.38235	2.40403	2.42578	2.44761	2.4695	2.49146	2.51349	2.53559	2.55775	2.57999	2.60228	2.62465	2.64707	2.66957	2.69212
	0.0848485	1.72228	1.74144	1.76069	1.78004	1.79949	1.81903	1.83867	1.8584	1.87822	1.89813	1.91814	1.93823	1.95842	1.97869	1.99905	2.01949	2.04002	2.06064	2.08134	2.10212	2.12299	2.14394	2.16497	2.18608	2.20727	2.22853	2.24988	2.27131	2.29281	2.31438	2.33604	2.35776	2.37957	2.40144	2.42339	2.44541	2.4675	2.48966	2.51189	2.53419	2.55656	2.579	2.6015	2.62407	2.64671	2.66941	2.69218	2.71501
	0.0858586	1.73316	1.75255	1.77204	1.79162	1.8113	1.83108	1.85096	1.87092	1.89098	1.91114	1.93139	1.95172	1.97215	1.99267	2.01327	2.03396	2.05474	2.07561	2.09656	2.11759	2.13871	2.15991	2.1812	2.20256	2.22401	2.24554	2.26714	2.28882	2.31059	2.33242	2.35434	2.37633	2.3984	2.42053	2.44275	2.46503	2.48739	2.50982	2.53232	2.55489	2.57753	2.60024	2.62302	2.64587	2.66878	2.69176	2.7148	2.73791
	0.0868687	1.74404	1.76366	1.78338	1.8032	1.82312	1.84313	1.86324	1.88345	1.90375	1.92415	1.94464	1.96521	1.98589	2.00665	2.0275	2.04844	2.06947	2.09058	2.11178	2.13307	2.15444	2.1759	2.19743	2.21905	2.24076	2.26254	2.28441	2.30635	2.32837	2.35047	2.37265	2.3949	2.41723	2.43964	2.46212	2.48467	2.50729	2.52999	2.55276	2.57561	2.59852	2.6215	2.64455	2.66767	2.69086	2.71411	2.73743	2.76082
	0.0878788	1.75493	1.77478	1.79473	1.81479	1.83494	1.85519	1.87554	1.89598	1.91652	1.93716	1.95789	1.97871	1.99963	2.02063	2.04173	2.06292	2.08419	2.10556	2.12701	2.14855	2.17017	2.19188	2.21367	2.23555	2.25751	2.27955	2.30167	2.32388	2.34616	2.36852	2.39096	2.41348	2.43607	2.45874	2.48149	2.50431	2.5272	2.55017	2.57321	2.59632	2.61951	2.64276	2.66609	2.68948	2.71294	2.73647	2.76007	2.78373
	0.0888889	1.76582	1.7859	1.80609	1.82637	1.84676	1.86725	1.88783	1.90852	1.9293	1.95017	1.97115	1.99221	2.01337	2.03462	2.05597	2.0774	2.09893	2.12054	2.14224	2.16403	2.18591	2.20787	2.22992	2.25205	2.27427	2.29657	2.31895	2.34141	2.36396	2.38658	2.40928	2.43206	2.45492	2.47786	2.50087	2.52396	2.54712	2.57035	2.59366	2.61705	2.6405	2.66403	2.68763	2.7113	2.73503	2.75884	2.78271	2.80666
	0.089899	1.77671	1.79703	1.81744	1.83797	1.85859	1.87931	1.90013	1.92106	1.94208	1.96319	1.98441	2.00572	2.02712	2.04862	2.07021	2.09189	2.11366	2.13553	2.15748	2.17952	2.20165	2.22387	2.24617	2.26856	2.29103	2.31359	2.33623	2.35895	2.38176	2.40464	2.42761	2.45065	2.47377	2.49698	2.52025	2.54361	2.56704	2.59055	2.61413	2.63778	2.66151	2.68531	2.70918	2.73312	2.75713	2.78121	2.80537	2.82959
	0.0909091	1.78761	1.80815	1.8288	1.84956	1.87042	1.89138	1.91244	1.9336	1.95486	1.97622	1.99767	2.01922	2.04087	2.06261	2.08445	2.10638	2.1284	2.15052	2.17272	2.19501	2.2174	2.23987	2.26243	2.28507	2.3078	2.33062	2.35351	2.3765	2.39956	2.42271	2.44594	2.46925	2.49263	2.5161	2.53965	2.56327	2.58697	2.61074	2.63459	2.65852	2.68252	2.70659	2.73073	2.75495	2.77924	2.8036	2.82802	2.85252
	0.0919192	1.79851	1.81928	1.84017	1.86116	1.88225	1.90344	1.92474	1.94614	1.96764	1.98924	2.01094	2.03274	2.05463	2.07662	2.0987	2.12088	2.14315	2.16551	2.18797	2.21051	2.23315	2.25587	2.27869	2.30159	2.32457	2.34765	2.3708	2.39405	2.41737	2.44078	2.46427	2.48785	2.5115	2.53523	2.55904	2.58293	2.6069	2.63094	2.65507	2.67926	2.70353	2.72788	2.7523	2.77679	2.80135	2.82599	2.85069	2.87547
	0.0929293	1.80941	1.83042	1.85153	1.87276	1.89408	1.91552	1.93705	1.95869	1.98043	2.00227	2.02421	2.04625	2.06839	2.09062	2.11295	2.13538	2.1579	2.18051	2.20322	2.22601	2.2489	2.27188	2.29495	2.31811	2.34135	2.36468	2.3881	2.4116	2.43519	2.45886	2.48262	2.50645	2.53037	2.55437	2.57845	2.6026	2.62684	2.65115	2.67555	2.70001	2.72456	2.74917	2.77387	2.79863	2.82347	2.84838	2.87337	2.89842
	0.0939394	1.82031	1.84155	1.8629	1.88436	1.90592	1.92759	1.94937	1.97124	1.99322	2.0153	2.03749	2.05977	2.08215	2.10463	2.12721	2.14988	2.17265	2.19551	2.21847	2.24152	2.26466	2.2879	2.31122	2.33463	2.35813	2.38172	2.4054	2.42916	2.45301	2.47695	2.50096	2.52506	2.54925	2.57351	2.59786	2.62228	2.64679	2.67137	2.69603	2.72077	2.74559	2.77048	2.79544	2.82049	2.8456	2.87079	2.89605	2.92138
	0.0949495	1.83122	1.85269	1.87427	1.89596	1.91776	1.93967	1.96168	1.9838	2.00602	2.02834	2.05077	2.07329	2.09592	2.11864	2.14147	2.16439	2.18741	2.21052	2.23373	2.25703	2.28043	2.30391	2.32749	2.35116	2.37492	2.39877	2.42271	2.44673	2.47084	2.49504	2.51932	2.54368	2.56813	2.59266	2.61727	2.64197	2.66674	2.69159	2.71653	2.74154	2.76662	2.79179	2.81703	2.84235	2.86774	2.8932	2.91874	2.94435
	0.0959596	1.84213	1.86383	1.88565	1.90757	1.92961	1.95175	1.974	1.99636	2.01882	2.04138	2.06405	2.08682	2.10969	2.13266	2.15573	2.1789	2.20217	2.22553	2.24899	2.27255	2.2962	2.31994	2.34377	2.3677	2.39172	2.41582	2.44002	2.4643	2.48867	2.51313	2.53767	2.5623	2.58702	2.61181	2.63669	2.66166	2.6867	2.71182	2.73702	2.76231	2.78767	2.81311	2.83862	2.86421	2.88988	2.91562	2.94144	2.96732
	0.0969697	1.85304	1.87498	1.89703	1.91919	1.94146	1.96384	1.98632	2.00892	2.03162	2.05443	2.07734	2.10035	2.12347	2.14668	2.17	2.19342	2.21694	2.24055	2.26426	2.28807	2.31197	2.33597	2.36006	2.38424	2.40851	2.43288	2.45733	2.48188	2.50651	2.53123	2.55604	2.58093	2.60591	2.63097	2.65612	2.68135	2.70666	2.73206	2.75753	2.78308	2.80872	2.83443	2.86022	2.88609	2.91203	2.93805	2.96414	2.99031
	0.0979798	1.86396	1.88612	1.90841	1.9308	1.95331	1.97592	1.99865	2.02148	2.04443	2.06747	2.09063	2.11388	2.13724	2.16071	2.18427	2.20794	2.23171	2.25557	2.27953	2.30359	2.32775	2.352	2.37634	2.40078	2.42532	2.44994	2.47466	2.49946	2.52436	2.54934	2.57441	2.59957	2.62481	2.65014	2.67556	2.70105	2.72663	2.7523	2.77804	2.80387	2.82978	2.85576	2.88182	2.90797	2.93419	2.96048	2.98685	3.0133
	0.0989899	1.87487	1.89728	1.91979	1.94242	1.96516	1.98802	2.01098	2.03405	2.05723	2.08052	2.10392	2.12742	2.15103	2.17474	2.19855	2.22246	2.24648	2.27059	2.29481	2.31912	2.34353	2.36804	2.39264	2.41733	2.44212	2.46701	2.49198	2.51705	2.5422	2.56745	2.59279	2.61821	2.64372	2.66931	2.695	2.72076	2.74661	2.77255	2.79856	2.82466	2.85084	2.8771	2.90344	2.92985	2.95635	2.98292	3.00957	3.0363
	0.1	1.8858	1.90843	1.93118	1.95404	1.97702	2.00011	2.02331	2.04663	2.07005	2.09358	2.11722	2.14096	2.16481	2.18877	2.21283	2.23699	2.26126	2.28562	2.31009	2.33465	2.35932	2.38408	2.40894	2.43389	2.45894	2.48408	2.50931	2.53464	2.56006	2.58557	2.61117	2.63685	2.66263	2.68849	2.71444	2.74048	2.7666	2.7928	2.81909	2.84546	2.87191	2.89844	2.92506	2.95175	2.97852	3.00537	3.0323	3.0593
[truncated: 52 more columns]
