# Supplementary material for: Determining the probability of hemiplasy in the presence of incomplete lineage sorting and introgression
Source: eLife. 2020 Dec 21;9:e63753. doi: 10.7554/eLife.63753 (PMC7800383; doi:10.7554/eLife.63753)
Supplement: Figure 5—source data 1. — condition: the simulation condition. hemi_count: the count of trees where a single mutation was observed. homo_count: the count of trees where two mutations were observed. cond_hemi: hemi_count divided by the sum of hemi_count and homo_count. raw_hemi: hemi_count divided by the total number of simulated trees. cond_homo: homo_count divided by the sum of hemi_count and homo_count. raw_homo: homo_count divided by the total number of simulated trees. pepo: cond_hemi divided by cond_homo. [file elife-63753-fig5-data1.xlsx]

## Sheet: benchmarking_sims_results
condition	hemi_count	homo_count	cond_hemi	raw_hemi	cond_homo	raw_homo	pepo
ILS1	276	368	0.394286	0.00276	0.525714	0.00368	0.75
ILS1	245	305	0.422414	0.00245	0.525862	0.00305	0.803279
ILS1	283	306	0.439441	0.00283	0.475155	0.00306	0.924837
ILS1	225	314	0.384615	0.00225	0.536752	0.00314	0.716561
ILS1	272	340	0.413374	0.00272	0.516717	0.0034	0.8
ILS1	272	312	0.442997	0.00272	0.508143	0.00312	0.871795
ILS1	283	345	0.419259	0.00283	0.511111	0.00345	0.82029
ILS1	250	280	0.433276	0.0025	0.485269	0.0028	0.892857
ILS1	264	335	0.413146	0.00264	0.524257	0.00335	0.78806
ILS1	229	324	0.390785	0.00229	0.552901	0.00324	0.70679
ILS1	228	320	0.378738	0.00228	0.531561	0.0032	0.7125
ILS1	259	301	0.421824	0.00259	0.490228	0.00301	0.860465
ILS1	242	300	0.432916	0.00242	0.536673	0.003	0.806667
ILS1	240	316	0.410959	0.0024	0.541096	0.00316	0.759494
ILS1	240	356	0.363636	0.0024	0.539394	0.00356	0.674157
ILS1	273	354	0.416794	0.00273	0.540458	0.00354	0.771186
ILS1	204	304	0.382022	0.00204	0.569288	0.00304	0.671053
ILS1	320	328	0.45977	0.0032	0.471264	0.00328	0.97561
ILS1	255	244	0.475746	0.00255	0.455224	0.00244	1.04508
ILS1	209	324	0.355442	0.00209	0.55102	0.00324	0.645062
ILS1	277	322	0.429457	0.00277	0.499225	0.00322	0.860248
ILS1	238	288	0.431159	0.00238	0.521739	0.00288	0.826389
ILS1	228	295	0.413043	0.00228	0.53442	0.00295	0.772881
ILS1	244	302	0.416382	0.00244	0.515358	0.00302	0.807947
ILS1	240	360	0.375	0.0024	0.5625	0.0036	0.666667
ILS1	282	338	0.425339	0.00282	0.509804	0.00338	0.83432
ILS1	244	337	0.387302	0.00244	0.534921	0.00337	0.724036
ILS1	238	327	0.402027	0.00238	0.552365	0.00327	0.727829
ILS1	232	320	0.381579	0.00232	0.526316	0.0032	0.725
ILS1	278	343	0.421851	0.00278	0.520486	0.00343	0.810496
ILS1	236	296	0.412587	0.00236	0.517483	0.00296	0.797297
ILS1	248	314	0.418919	0.00248	0.530405	0.00314	0.789809
ILS1	263	297	0.433993	0.00263	0.490099	0.00297	0.885522
ILS1	269	303	0.443163	0.00269	0.499176	0.00303	0.887789
ILS1	240	347	0.378549	0.0024	0.547319	0.00347	0.691643
ILS1	203	291	0.385199	0.00203	0.552182	0.00291	0.697595
ILS1	228	288	0.411552	0.00228	0.519856	0.00288	0.791667
ILS1	226	284	0.391003	0.00226	0.491349	0.00284	0.795775
ILS1	289	273	0.491497	0.00289	0.464286	0.00273	1.05861
ILS1	260	312	0.433333	0.0026	0.52	0.00312	0.833333
ILS1	264	324	0.434211	0.00264	0.532895	0.00324	0.814815
ILS1	212	315	0.379249	0.00212	0.563506	0.00315	0.673016
ILS1	266	264	0.461806	0.00266	0.458333	0.00264	1.00758
ILS1	259	289	0.436762	0.00259	0.487352	0.00289	0.896194
ILS1	276	344	0.405882	0.00276	0.505882	0.00344	0.802326
ILS1	239	354	0.374608	0.00239	0.554859	0.00354	0.675141
ILS1	249	302	0.418487	0.00249	0.507563	0.00302	0.824503
ILS1	264	346	0.396396	0.00264	0.51952	0.00346	0.763006
ILS1	260	344	0.401235	0.0026	0.530864	0.00344	0.755814
ILS1	268	304	0.435065	0.00268	0.493506	0.00304	0.881579
ILS1	252	325	0.415842	0.00252	0.536304	0.00325	0.775385
ILS1	316	292	0.479514	0.00316	0.443096	0.00292	1.08219
ILS1	250	280	0.431034	0.0025	0.482759	0.0028	0.892857
ILS1	236	332	0.388158	0.00236	0.546053	0.00332	0.710843
ILS1	244	320	0.386076	0.00244	0.506329	0.0032	0.7625
ILS1	264	412	0.358696	0.00264	0.559783	0.00412	0.640777
ILS1	267	275	0.462738	0.00267	0.476603	0.00275	0.970909
ILS1	215	349	0.356551	0.00215	0.578773	0.00349	0.616046
ILS1	256	320	0.410256	0.00256	0.512821	0.0032	0.8
ILS1	232	306	0.39726	0.00232	0.523973	0.00306	0.75817
ILS1	310	347	0.455882	0.0031	0.510294	0.00347	0.893372
ILS1	261	289	0.437186	0.00261	0.484087	0.00289	0.903114
ILS1	262	292	0.439597	0.00262	0.489933	0.00292	0.89726
ILS1	204	348	0.331169	0.00204	0.564935	0.00348	0.586207
ILS1	242	272	0.448148	0.00242	0.503704	0.00272	0.889706
ILS1	216	280	0.391304	0.00216	0.507246	0.0028	0.771429
ILS1	224	324	0.383562	0.00224	0.554795	0.00324	0.691358
ILS1	227	317	0.386054	0.00227	0.539116	0.00317	0.716088
ILS1	278	326	0.431677	0.00278	0.506211	0.00326	0.852761
ILS1	302	320	0.461774	0.00302	0.489297	0.0032	0.94375
ILS1	224	336	0.370861	0.00224	0.556291	0.00336	0.666667
ILS1	230	276	0.427509	0.0023	0.513011	0.00276	0.833333
ILS1	296	264	0.496644	0.00296	0.442953	0.00264	1.12121
ILS1	274	314	0.436306	0.00274	0.5	0.00314	0.872611
ILS1	304	360	0.436782	0.00304	0.517241	0.0036	0.844444
ILS1	222	304	0.38676	0.00222	0.529617	0.00304	0.730263
ILS1	238	326	0.396667	0.00238	0.543333	0.00326	0.730061
ILS1	220	287	0.407407	0.0022	0.531481	0.00287	0.766551
ILS1	258	332	0.40694	0.00258	0.523659	0.00332	0.777108
ILS1	266	334	0.416928	0.00266	0.523511	0.00334	0.796407
ILS1	253	303	0.433219	0.00253	0.518836	0.00303	0.834983
ILS1	228	341	0.38	0.00228	0.568333	0.00341	0.668622
ILS1	240	308	0.410959	0.0024	0.527397	0.00308	0.779221
ILS1	220	336	0.37415	0.0022	0.571429	0.00336	0.654762
ILS1	272	348	0.413374	0.00272	0.528875	0.00348	0.781609
ILS1	272	356	0.414634	0.00272	0.542683	0.00356	0.764045
ILS1	216	357	0.344498	0.00216	0.569378	0.00357	0.605042
ILS1	226	270	0.416974	0.00226	0.498155	0.0027	0.837037
ILS1	259	330	0.413078	0.00259	0.526316	0.0033	0.784848
ILS1	241	312	0.411966	0.00241	0.533333	0.00312	0.772436
ILS1	253	291	0.423786	0.00253	0.487437	0.00291	0.869416
ILS1	248	312	0.414023	0.00248	0.520868	0.00312	0.794872
ILS1	198	286	0.385214	0.00198	0.55642	0.00286	0.692308
ILS1	224	290	0.39576	0.00224	0.512367	0.0029	0.772414
ILS1	276	276	0.45098	0.00276	0.45098	0.00276	1
ILS1	190	296	0.359168	0.0019	0.559546	0.00296	0.641892
ILS1	248	287	0.438938	0.00248	0.507965	0.00287	0.864111
ILS1	248	302	0.417508	0.00248	0.508418	0.00302	0.821192
ILS1	264	242	0.489796	0.00264	0.44898	0.00242	1.09091
ILS1	241	282	0.432675	0.00241	0.506284	0.00282	0.85461
ILS2	326	315	0.469065	0.00326	0.453237	0.00315	1.03492
ILS2	382	316	0.496104	0.00382	0.41039	0.00316	1.20886
ILS2	299	380	0.423513	0.00299	0.538244	0.0038	0.786842
ILS2	306	314	0.459459	0.00306	0.471471	0.00314	0.974522
ILS2	367	312	0.50831	0.00367	0.432133	0.00312	1.17628
ILS2	338	312	0.490566	0.00338	0.45283	0.00312	1.08333
ILS2	302	320	0.438953	0.00302	0.465116	0.0032	0.94375
ILS2	302	340	0.432665	0.00302	0.487106	0.0034	0.888235
ILS2	340	358	0.455764	0.0034	0.479893	0.00358	0.949721
ILS2	324	337	0.451883	0.00324	0.470014	0.00337	0.961424
ILS2	328	340	0.443243	0.00328	0.459459	0.0034	0.964706
ILS2	317	347	0.449008	0.00317	0.491501	0.00347	0.913545
ILS2	282	292	0.447619	0.00282	0.463492	0.00292	0.965753
ILS2	344	264	0.527607	0.00344	0.404908	0.00264	1.30303
ILS2	278	383	0.396011	0.00278	0.545584	0.00383	0.725849
ILS2	309	315	0.455752	0.00309	0.464602	0.00315	0.980952
ILS2	296	304	0.45679	0.00296	0.469136	0.00304	0.973684
ILS2	348	346	0.466488	0.00348	0.463807	0.00346	1.00578
ILS2	312	336	0.453488	0.00312	0.488372	0.00336	0.928571
ILS2	280	342	0.41543	0.0028	0.507418	0.00342	0.818713
ILS2	356	352	0.472149	0.00356	0.466844	0.00352	1.01136
ILS2	336	320	0.494118	0.00336	0.470588	0.0032	1.05
ILS2	372	335	0.489474	0.00372	0.440789	0.00335	1.11045
ILS2	316	362	0.435262	0.00316	0.498623	0.00362	0.872928
ILS2	364	335	0.493894	0.00364	0.454545	0.00335	1.08657
ILS2	319	285	0.496885	0.00319	0.443925	0.00285	1.1193
ILS2	340	372	0.449735	0.0034	0.492063	0.00372	0.913978
ILS2	403	376	0.475236	0.00403	0.443396	0.00376	1.07181
ILS2	377	329	0.509459	0.00377	0.444595	0.00329	1.1459
ILS2	315	331	0.453237	0.00315	0.476259	0.00331	0.951662
ILS2	360	370	0.466321	0.0036	0.479275	0.0037	0.972973
ILS2	324	344	0.462857	0.00324	0.491429	0.00344	0.94186
ILS2	360	386	0.45512	0.0036	0.48799	0.00386	0.932642
ILS2	360	398	0.453972	0.0036	0.501892	0.00398	0.904523
ILS2	334	369	0.455041	0.00334	0.502725	0.00369	0.905149
ILS2	282	298	0.439252	0.00282	0.464174	0.00298	0.946309
ILS2	327	303	0.493958	0.00327	0.457704	0.00303	1.07921
ILS2	323	361	0.427815	0.00323	0.478146	0.00361	0.894737
ILS2	298	320	0.457757	0.00298	0.491551	0.0032	0.93125
ILS2	318	359	0.433834	0.00318	0.489768	0.00359	0.885794
ILS2	308	324	0.450292	0.00308	0.473684	0.00324	0.950617
ILS2	363	332	0.493878	0.00363	0.451701	0.00332	1.09337
ILS2	316	332	0.460641	0.00316	0.483965	0.00332	0.951807
ILS2	372	332	0.489474	0.00372	0.436842	0.00332	1.12048
ILS2	310	330	0.449275	0.0031	0.478261	0.0033	0.939394
ILS2	385	355	0.492958	0.00385	0.454545	0.00355	1.08451
ILS2	316	340	0.456647	0.00316	0.491329	0.0034	0.929412
ILS2	316	420	0.407216	0.00316	0.541237	0.0042	0.752381
ILS2	328	348	0.458101	0.00328	0.486034	0.00348	0.942529
ILS2	306	312	0.469325	0.00306	0.478528	0.00312	0.980769
ILS2	310	325	0.467572	0.0031	0.490196	0.00325	0.953846
ILS2	356	280	0.508571	0.00356	0.4	0.0028	1.27143
ILS2	326	332	0.463068	0.00326	0.471591	0.00332	0.981928
ILS2	285	345	0.433131	0.00285	0.524316	0.00345	0.826087
ILS2	307	351	0.422865	0.00307	0.483471	0.00351	0.874644
ILS2	289	322	0.433283	0.00289	0.482759	0.00322	0.897516
ILS2	340	352	0.477528	0.0034	0.494382	0.00352	0.965909
ILS2	388	280	0.532967	0.00388	0.384615	0.0028	1.38571
ILS2	329	357	0.438667	0.00329	0.476	0.00357	0.921569
ILS2	317	348	0.450925	0.00317	0.495021	0.00348	0.91092
ILS2	342	324	0.48169	0.00342	0.456338	0.00324	1.05556
ILS2	316	300	0.481707	0.00316	0.457317	0.003	1.05333
ILS2	340	330	0.481586	0.0034	0.467422	0.0033	1.0303
ILS2	354	358	0.464567	0.00354	0.469816	0.00358	0.988827
ILS2	276	355	0.414414	0.00276	0.533033	0.00355	0.777465
ILS2	340	324	0.469613	0.0034	0.447514	0.00324	1.04938
ILS2	332	356	0.465638	0.00332	0.499299	0.00356	0.932584
ILS2	359	343	0.487772	0.00359	0.466033	0.00343	1.04665
ILS2	334	330	0.465181	0.00334	0.45961	0.0033	1.01212
ILS2	367	365	0.46871	0.00367	0.466156	0.00365	1.00548
ILS2	286	332	0.426866	0.00286	0.495522	0.00332	0.861446
ILS2	318	330	0.462209	0.00318	0.479651	0.0033	0.963636
ILS2	328	288	0.492492	0.00328	0.432432	0.00288	1.13889
ILS2	296	352	0.425287	0.00296	0.505747	0.00352	0.840909
ILS2	340	346	0.465116	0.0034	0.473324	0.00346	0.982659
ILS2	312	342	0.443182	0.00312	0.485795	0.00342	0.912281
ILS2	339	405	0.435733	0.00339	0.520566	0.00405	0.837037
ILS2	323	322	0.465418	0.00323	0.463977	0.00322	1.00311
ILS2	317	379	0.425503	0.00317	0.508725	0.00379	0.836412
ILS2	304	436	0.391753	0.00304	0.561856	0.00436	0.697248
ILS2	316	356	0.436464	0.00316	0.491713	0.00356	0.88764
ILS2	333	378	0.442231	0.00333	0.501992	0.00378	0.880952
ILS2	264	352	0.39521	0.00264	0.526946	0.00352	0.75
ILS2	302	366	0.426554	0.00302	0.516949	0.00366	0.825137
ILS2	292	337	0.439098	0.00292	0.506767	0.00337	0.866469
ILS2	372	371	0.478764	0.00372	0.477477	0.00371	1.0027
ILS2	322	338	0.456091	0.00322	0.478754	0.00338	0.952663
ILS2	318	300	0.48773	0.00318	0.460123	0.003	1.06
ILS2	327	351	0.440108	0.00327	0.472409	0.00351	0.931624
ILS2	396	328	0.521053	0.00396	0.431579	0.00328	1.20732
ILS2	296	334	0.443778	0.00296	0.50075	0.00334	0.886228
ILS2	317	275	0.486196	0.00317	0.421779	0.00275	1.15273
ILS2	327	327	0.463173	0.00327	0.463173	0.00327	1
ILS2	360	356	0.477454	0.0036	0.472149	0.00356	1.01124
ILS2	320	338	0.462428	0.0032	0.488439	0.00338	0.946746
ILS2	276	296	0.442308	0.00276	0.474359	0.00296	0.932432
ILS2	356	280	0.51076	0.00356	0.401722	0.0028	1.27143
ILS2	324	372	0.436658	0.00324	0.501348	0.00372	0.870968
ILS2	308	358	0.441261	0.00308	0.512894	0.00358	0.860335
ILS2	364	389	0.461343	0.00364	0.493029	0.00389	0.935733
ILS3	412	304	0.539267	0.00412	0.397906	0.00304	1.35526
ILS3	428	386	0.5	0.00428	0.450935	0.00386	1.10881
ILS3	442	432	0.474758	0.00442	0.464017	0.00432	1.02315
ILS3	454	387	0.49945	0.00454	0.425743	0.00387	1.17313
ILS3	422	347	0.509047	0.00422	0.418577	0.00347	1.21614
ILS3	448	308	0.555831	0.00448	0.382134	0.00308	1.45455
ILS3	402	362	0.482014	0.00402	0.434053	0.00362	1.1105
ILS3	384	324	0.514745	0.00384	0.434316	0.00324	1.18519
ILS3	454	382	0.494015	0.00454	0.415669	0.00382	1.18848
ILS3	500	404	0.52521	0.005	0.42437	0.00404	1.23762
ILS3	495	346	0.552455	0.00495	0.386161	0.00346	1.43064
ILS3	482	297	0.580723	0.00482	0.357831	0.00297	1.6229
ILS3	428	396	0.488584	0.00428	0.452055	0.00396	1.08081
ILS3	427	368	0.49709	0.00427	0.428405	0.00368	1.16033
ILS3	488	312	0.580952	0.00488	0.371429	0.00312	1.5641
ILS3	476	373	0.527132	0.00476	0.413068	0.00373	1.27614
ILS3	513	346	0.568106	0.00513	0.383167	0.00346	1.48266
ILS3	500	420	0.492126	0.005	0.413386	0.0042	1.19048
ILS3	397	350	0.491945	0.00397	0.433705	0.0035	1.13429
ILS3	429	380	0.496528	0.00429	0.439815	0.0038	1.12895
ILS3	438	328	0.536108	0.00438	0.401469	0.00328	1.33537
ILS3	438	356	0.522673	0.00438	0.424821	0.00356	1.23034
ILS3	411	383	0.49399	0.00411	0.460337	0.00383	1.07311
ILS3	422	338	0.521632	0.00422	0.4178	0.00338	1.24852
ILS3	411	285	0.54727	0.00411	0.379494	0.00285	1.44211
ILS3	427	352	0.512605	0.00427	0.422569	0.00352	1.21307
ILS3	416	328	0.536082	0.00416	0.42268	0.00328	1.26829
ILS3	469	314	0.56438	0.00469	0.377858	0.00314	1.49363
ILS3	474	358	0.526082	0.00474	0.397336	0.00358	1.32402
ILS3	418	360	0.488318	0.00418	0.420561	0.0036	1.16111
ILS3	396	404	0.471429	0.00396	0.480952	0.00404	0.980198
ILS3	413	388	0.484742	0.00413	0.455399	0.00388	1.06443
ILS3	348	352	0.457895	0.00348	0.463158	0.00352	0.988636
ILS3	445	330	0.536791	0.00445	0.39807	0.0033	1.34848
ILS3	411	435	0.463883	0.00411	0.490971	0.00435	0.944828
ILS3	496	332	0.56621	0.00496	0.378995	0.00332	1.49398
ILS3	468	356	0.524664	0.00468	0.399103	0.00356	1.31461
ILS3	427	368	0.505325	0.00427	0.435503	0.00368	1.16033
ILS3	368	360	0.479167	0.00368	0.46875	0.0036	1.02222
ILS3	432	384	0.498845	0.00432	0.443418	0.00384	1.125
ILS3	443	295	0.560051	0.00443	0.372946	0.00295	1.50169
ILS3	377	366	0.474214	0.00377	0.460377	0.00366	1.03005
ILS3	366	388	0.445255	0.00366	0.472019	0.00388	0.943299
ILS3	440	325	0.546584	0.0044	0.403727	0.00325	1.35385
ILS3	442	343	0.528076	0.00442	0.409797	0.00343	1.28863
ILS3	460	356	0.526316	0.0046	0.407323	0.00356	1.29213
ILS3	444	324	0.549505	0.00444	0.40099	0.00324	1.37037
ILS3	544	436	0.53125	0.00544	0.425781	0.00436	1.24771
ILS3	394	374	0.488834	0.00394	0.46402	0.00374	1.05348
ILS3	356	360	0.468421	0.00356	0.473684	0.0036	0.988889
ILS3	434	397	0.498851	0.00434	0.456322	0.00397	1.0932
ILS3	438	428	0.474026	0.00438	0.463203	0.00428	1.02336
ILS3	461	339	0.549464	0.00461	0.404052	0.00339	1.35988
ILS3	441	316	0.549191	0.00441	0.393524	0.00316	1.39557
ILS3	464	386	0.520763	0.00464	0.433221	0.00386	1.20207
ILS3	413	399	0.476905	0.00413	0.460739	0.00399	1.03509
ILS3	426	344	0.518879	0.00426	0.419001	0.00344	1.23837
ILS3	447	334	0.527123	0.00447	0.393868	0.00334	1.33832
ILS3	402	342	0.506936	0.00402	0.431274	0.00342	1.17544
ILS3	458	321	0.556501	0.00458	0.390036	0.00321	1.42679
ILS3	401	294	0.547067	0.00401	0.401091	0.00294	1.36395
ILS3	428	316	0.540404	0.00428	0.39899	0.00316	1.35443
ILS3	430	350	0.519324	0.0043	0.422705	0.0035	1.22857
ILS3	383	375	0.465937	0.00383	0.456204	0.00375	1.02133
ILS3	467	306	0.570208	0.00467	0.373626	0.00306	1.52614
ILS3	460	452	0.481172	0.0046	0.472803	0.00452	1.0177
ILS3	487	319	0.565621	0.00487	0.370499	0.00319	1.52665
ILS3	450	309	0.556242	0.0045	0.381953	0.00309	1.45631
ILS3	438	344	0.536765	0.00438	0.421569	0.00344	1.27326
ILS3	377	383	0.463145	0.00377	0.470516	0.00383	0.984334
ILS3	428	368	0.514423	0.00428	0.442308	0.00368	1.16304
ILS3	461	360	0.519144	0.00461	0.405405	0.0036	1.28056
ILS3	430	411	0.478309	0.0043	0.457175	0.00411	1.04623
ILS3	452	336	0.545894	0.00452	0.405797	0.00336	1.34524
ILS3	459	308	0.561125	0.00459	0.376528	0.00308	1.49026
ILS3	471	390	0.520442	0.00471	0.430939	0.0039	1.20769
ILS3	446	342	0.523474	0.00446	0.401408	0.00342	1.30409
ILS3	388	412	0.468599	0.00388	0.497585	0.00412	0.941748
ILS3	462	328	0.55	0.00462	0.390476	0.00328	1.40854
ILS3	458	398	0.501094	0.00458	0.435449	0.00398	1.15075
ILS3	434	339	0.526061	0.00434	0.410909	0.00339	1.28024
ILS3	477	396	0.518478	0.00477	0.430435	0.00396	1.20455
ILS3	412	318	0.515645	0.00412	0.397997	0.00318	1.2956
ILS3	456	308	0.57	0.00456	0.385	0.00308	1.48052
ILS3	492	284	0.594203	0.00492	0.342995	0.00284	1.73239
ILS3	466	369	0.527746	0.00466	0.417894	0.00369	1.26287
ILS3	441	367	0.506897	0.00441	0.421839	0.00367	1.20163
ILS3	404	384	0.490291	0.00404	0.466019	0.00384	1.05208
ILS3	445	311	0.552109	0.00445	0.385856	0.00311	1.43087
ILS3	428	404	0.491954	0.00428	0.464368	0.00404	1.05941
ILS3	368	332	0.489362	0.00368	0.441489	0.00332	1.10843
ILS3	440	360	0.518868	0.0044	0.424528	0.0036	1.22222
ILS3	436	349	0.53106	0.00436	0.425091	0.00349	1.24928
ILS3	488	388	0.530435	0.00488	0.421739	0.00388	1.25773
ILS3	489	306	0.576651	0.00489	0.360849	0.00306	1.59804
ILS3	460	360	0.525114	0.0046	0.410959	0.0036	1.27778
ILS3	437	360	0.514723	0.00437	0.424028	0.0036	1.21389
ILS3	404	346	0.516624	0.00404	0.442455	0.00346	1.16763
ILS3	410	440	0.459641	0.0041	0.493274	0.0044	0.931818
ILS3	478	362	0.531111	0.00478	0.402222	0.00362	1.32044
INT1	426	370	0.50654	0.00426	0.439952	0.0037	1.15135
INT1	479	359	0.534598	0.00479	0.40067	0.00359	1.33426
INT1	419	364	0.497625	0.00419	0.432304	0.00364	1.1511
INT1	446	396	0.5	0.00446	0.443946	0.00396	1.12626
INT1	521	415	0.528934	0.00521	0.42132	0.00415	1.25542
INT1	459	390	0.51631	0.00459	0.438695	0.0039	1.17692
INT1	525	367	0.551471	0.00525	0.385504	0.00367	1.43052
INT1	421	350	0.503589	0.00421	0.41866	0.0035	1.20286
INT1	478	396	0.513426	0.00478	0.425349	0.00396	1.20707
INT1	456	355	0.527168	0.00456	0.410405	0.00355	1.28451
INT1	488	322	0.566125	0.00488	0.37355	0.00322	1.51553
INT1	460	316	0.55355	0.0046	0.380265	0.00316	1.4557
INT1	373	374	0.476373	0.00373	0.47765	0.00374	0.997326
INT1	413	322	0.539164	0.00413	0.420366	0.00322	1.28261
INT1	408	423	0.459977	0.00408	0.476888	0.00423	0.964539
INT1	502	361	0.551648	0.00502	0.396703	0.00361	1.39058
INT1	413	328	0.526115	0.00413	0.417834	0.00328	1.25915
INT1	402	401	0.474057	0.00402	0.472877	0.00401	1.00249
INT1	464	377	0.517857	0.00464	0.420759	0.00377	1.23077
INT1	411	336	0.517632	0.00411	0.423174	0.00336	1.22321
INT1	479	434	0.502623	0.00479	0.455404	0.00434	1.10369
INT1	467	360	0.529478	0.00467	0.408163	0.0036	1.29722
INT1	506	387	0.53545	0.00506	0.409524	0.00387	1.30749
INT1	438	422	0.488294	0.00438	0.470457	0.00422	1.03791
INT1	416	382	0.490566	0.00416	0.450472	0.00382	1.08901
INT1	420	314	0.545455	0.0042	0.407792	0.00314	1.33758
INT1	467	294	0.567436	0.00467	0.35723	0.00294	1.58844
INT1	447	402	0.503378	0.00447	0.452703	0.00402	1.11194
INT1	477	434	0.497912	0.00477	0.453027	0.00434	1.09908
INT1	465	393	0.506536	0.00465	0.428105	0.00393	1.18321
INT1	436	311	0.54432	0.00436	0.388265	0.00311	1.40193
INT1	476	334	0.554779	0.00476	0.389277	0.00334	1.42515
INT1	417	365	0.501202	0.00417	0.438702	0.00365	1.14247
INT1	422	384	0.502381	0.00422	0.457143	0.00384	1.09896
INT1	511	370	0.547696	0.00511	0.39657	0.0037	1.38108
INT1	436	378	0.492099	0.00436	0.426637	0.00378	1.15344
INT1	474	326	0.558962	0.00474	0.384434	0.00326	1.45399
INT1	484	374	0.547511	0.00484	0.423077	0.00374	1.29412
INT1	493	353	0.546563	0.00493	0.391353	0.00353	1.3966
INT1	455	344	0.532164	0.00455	0.402339	0.00344	1.32267
INT1	370	368	0.475578	0.0037	0.473008	0.00368	1.00543
INT1	430	418	0.488636	0.0043	0.475	0.00418	1.02871
INT1	468	411	0.506494	0.00468	0.444805	0.00411	1.13869
INT1	468	385	0.522905	0.00468	0.430168	0.00385	1.21558
INT1	436	388	0.498856	0.00436	0.443936	0.00388	1.12371
INT1	410	430	0.45505	0.0041	0.477248	0.0043	0.953488
INT1	407	339	0.51195	0.00407	0.426415	0.00339	1.20059
INT1	437	342	0.515939	0.00437	0.403778	0.00342	1.27778
INT1	494	334	0.555056	0.00494	0.375281	0.00334	1.47904
INT1	439	396	0.486696	0.00439	0.439024	0.00396	1.10859
INT1	412	370	0.494005	0.00412	0.443645	0.0037	1.11351
INT1	505	443	0.505	0.00505	0.443	0.00443	1.13995
INT1	486	340	0.549774	0.00486	0.384615	0.0034	1.42941
INT1	424	349	0.520885	0.00424	0.428747	0.00349	1.2149
INT1	395	343	0.502545	0.00395	0.436387	0.00343	1.1516
INT1	398	352	0.502525	0.00398	0.444444	0.00352	1.13068
INT1	477	354	0.534753	0.00477	0.396861	0.00354	1.34746
INT1	530	365	0.559662	0.0053	0.385428	0.00365	1.45205
INT1	476	337	0.549654	0.00476	0.389145	0.00337	1.41246
INT1	448	354	0.537815	0.00448	0.42497	0.00354	1.26554
INT1	450	352	0.536353	0.0045	0.419547	0.00352	1.27841
INT1	489	365	0.537363	0.00489	0.401099	0.00365	1.33973
INT1	442	378	0.506881	0.00442	0.433486	0.00378	1.16931
INT1	476	377	0.533035	0.00476	0.422172	0.00377	1.2626
INT1	475	367	0.532511	0.00475	0.411435	0.00367	1.29428
INT1	433	309	0.547408	0.00433	0.390645	0.00309	1.40129
INT1	477	368	0.521311	0.00477	0.402186	0.00368	1.2962
INT1	541	384	0.564129	0.00541	0.400417	0.00384	1.40885
INT1	477	407	0.506908	0.00477	0.432519	0.00407	1.17199
INT1	457	334	0.549279	0.00457	0.401442	0.00334	1.36826
INT1	421	329	0.532911	0.00421	0.416456	0.00329	1.27964
INT1	444	332	0.542787	0.00444	0.405868	0.00332	1.33735
INT1	412	361	0.494598	0.00412	0.433373	0.00361	1.14127
INT1	509	325	0.579067	0.00509	0.369738	0.00325	1.56615
INT1	467	351	0.531891	0.00467	0.399772	0.00351	1.33048
INT1	486	326	0.567757	0.00486	0.380841	0.00326	1.4908
INT1	481	316	0.565882	0.00481	0.371765	0.00316	1.52215
INT1	441	346	0.533898	0.00441	0.418886	0.00346	1.27457
INT1	439	341	0.520759	0.00439	0.404508	0.00341	1.28739
INT1	442	387	0.497748	0.00442	0.435811	0.00387	1.14212
INT1	473	405	0.50915	0.00473	0.435953	0.00405	1.1679
INT1	411	388	0.485816	0.00411	0.458629	0.00388	1.05928
INT1	472	321	0.559242	0.00472	0.380332	0.00321	1.4704
INT1	393	386	0.475212	0.00393	0.466747	0.00386	1.01813
INT1	481	409	0.518878	0.00481	0.441208	0.00409	1.17604
INT1	457	367	0.508909	0.00457	0.408686	0.00367	1.24523
INT1	450	361	0.536353	0.0045	0.430274	0.00361	1.24654
INT1	459	329	0.545131	0.00459	0.390736	0.00329	1.39514
INT1	453	388	0.504454	0.00453	0.432071	0.00388	1.16753
INT1	559	335	0.596585	0.00559	0.357524	0.00335	1.66866
INT1	470	360	0.538373	0.0047	0.412371	0.0036	1.30556
INT1	435	451	0.466238	0.00435	0.483387	0.00451	0.964523
INT1	434	309	0.554278	0.00434	0.394636	0.00309	1.40453
INT1	402	364	0.498141	0.00402	0.451053	0.00364	1.1044
INT1	439	344	0.532767	0.00439	0.417476	0.00344	1.27616
INT1	475	295	0.580685	0.00475	0.360636	0.00295	1.61017
INT1	490	323	0.563867	0.0049	0.371692	0.00323	1.51703
INT1	524	332	0.58613	0.00524	0.371365	0.00332	1.57831
INT1	481	377	0.529736	0.00481	0.415198	0.00377	1.27586
INT1	487	330	0.563006	0.00487	0.381503	0.0033	1.47576
INT2	542	403	0.542	0.00542	0.403	0.00403	1.34491
INT2	531	323	0.591314	0.00531	0.359688	0.00323	1.64396
INT2	539	367	0.560291	0.00539	0.381497	0.00367	1.46866
INT2	554	307	0.600217	0.00554	0.332611	0.00307	1.80456
INT2	594	358	0.581213	0.00594	0.350294	0.00358	1.65922
INT2	505	421	0.520082	0.00505	0.433574	0.00421	1.19952
INT2	508	380	0.555799	0.00508	0.415755	0.0038	1.33684
INT2	583	359	0.579523	0.00583	0.356859	0.00359	1.62396
INT2	512	385	0.544102	0.00512	0.409139	0.00385	1.32987
INT2	574	345	0.585714	0.00574	0.352041	0.00345	1.66377
INT2	495	369	0.536876	0.00495	0.400217	0.00369	1.34146
INT2	554	403	0.553447	0.00554	0.402597	0.00403	1.37469
INT2	554	416	0.539961	0.00554	0.405458	0.00416	1.33173
INT2	532	357	0.56	0.00532	0.375789	0.00357	1.4902
INT2	630	410	0.581181	0.0063	0.378229	0.0041	1.53659
INT2	545	444	0.53589	0.00545	0.436578	0.00444	1.22748
INT2	600	339	0.615385	0.006	0.347692	0.00339	1.76991
INT2	585	311	0.61774	0.00585	0.328405	0.00311	1.88103
INT2	504	360	0.555066	0.00504	0.396476	0.0036	1.4
INT2	523	353	0.552854	0.00523	0.37315	0.00353	1.48159
INT2	601	339	0.612016	0.00601	0.345214	0.00339	1.77286
INT2	525	368	0.560897	0.00525	0.393162	0.00368	1.42663
INT2	545	315	0.596933	0.00545	0.345016	0.00315	1.73016
INT2	589	346	0.604723	0.00589	0.355236	0.00346	1.70231
INT2	544	381	0.551724	0.00544	0.38641	0.00381	1.42782
INT2	546	342	0.577778	0.00546	0.361905	0.00342	1.59649
INT2	520	406	0.539419	0.0052	0.421162	0.00406	1.28079
INT2	570	344	0.590674	0.0057	0.356477	0.00344	1.65698
INT2	551	379	0.558824	0.00551	0.384381	0.00379	1.45383
INT2	448	423	0.487486	0.00448	0.460283	0.00423	1.0591
INT2	597	312	0.621875	0.00597	0.325	0.00312	1.91346
INT2	570	372	0.561024	0.0057	0.366142	0.00372	1.53226
INT2	480	305	0.577617	0.0048	0.367028	0.00305	1.57377
INT2	567	323	0.608369	0.00567	0.346567	0.00323	1.75542
INT2	528	383	0.54433	0.00528	0.394845	0.00383	1.37859
INT2	524	328	0.59276	0.00524	0.371041	0.00328	1.59756
INT2	565	386	0.548012	0.00565	0.374394	0.00386	1.46373
INT2	550	341	0.583864	0.0055	0.361996	0.00341	1.6129
INT2	531	384	0.525223	0.00531	0.379822	0.00384	1.38281
INT2	539	324	0.58587	0.00539	0.352174	0.00324	1.66358
INT2	607	393	0.576996	0.00607	0.373574	0.00393	1.54453
INT2	589	353	0.583168	0.00589	0.349505	0.00353	1.66856
INT2	476	363	0.537853	0.00476	0.410169	0.00363	1.31129
INT2	540	354	0.56902	0.0054	0.373024	0.00354	1.52542
INT2	486	315	0.571765	0.00486	0.370588	0.00315	1.54286
INT2	594	383	0.577821	0.00594	0.372568	0.00383	1.55091
INT2	521	382	0.542144	0.00521	0.397503	0.00382	1.36387
INT2	559	356	0.589041	0.00559	0.375132	0.00356	1.57022
INT2	536	319	0.593577	0.00536	0.353267	0.00319	1.68025
INT2	527	355	0.569114	0.00527	0.383369	0.00355	1.48451
INT2	557	305	0.609409	0.00557	0.333698	0.00305	1.82623
INT2	477	361	0.529412	0.00477	0.400666	0.00361	1.32133
INT2	554	365	0.565306	0.00554	0.372449	0.00365	1.51781
INT2	548	407	0.53937	0.00548	0.400591	0.00407	1.34644
INT2	508	346	0.55398	0.00508	0.377317	0.00346	1.46821
INT2	502	300	0.596908	0.00502	0.356718	0.003	1.67333
INT2	502	347	0.552255	0.00502	0.381738	0.00347	1.44669
INT2	569	345	0.588418	0.00569	0.356774	0.00345	1.64928
INT2	564	361	0.578462	0.00564	0.370256	0.00361	1.56233
INT2	570	415	0.55773	0.0057	0.406067	0.00415	1.37349
INT2	476	333	0.547126	0.00476	0.382759	0.00333	1.42943
INT2	558	324	0.601293	0.00558	0.349138	0.00324	1.72222
INT2	551	362	0.572765	0.00551	0.376299	0.00362	1.5221
INT2	567	370	0.567568	0.00567	0.37037	0.0037	1.53243
INT2	476	390	0.523077	0.00476	0.428571	0.0039	1.22051
INT2	618	411	0.561308	0.00618	0.373297	0.00411	1.50365
INT2	503	328	0.56772	0.00503	0.370203	0.00328	1.53354
INT2	488	387	0.524168	0.00488	0.415682	0.00387	1.26098
INT2	501	402	0.525708	0.00501	0.421826	0.00402	1.24627
INT2	572	309	0.619718	0.00572	0.334778	0.00309	1.85113
INT2	523	362	0.562366	0.00523	0.389247	0.00362	1.44475
INT2	586	344	0.59857	0.00586	0.351379	0.00344	1.70349
INT2	609	375	0.583893	0.00609	0.35954	0.00375	1.624
INT2	569	357	0.582395	0.00569	0.365404	0.00357	1.59384
INT2	500	377	0.527983	0.005	0.398099	0.00377	1.32626
INT2	532	396	0.546763	0.00532	0.406989	0.00396	1.34343
INT2	585	355	0.590313	0.00585	0.358224	0.00355	1.64789
INT2	497	367	0.555928	0.00497	0.410515	0.00367	1.35422
INT2	577	380	0.568473	0.00577	0.374384	0.0038	1.51842
INT2	555	349	0.57394	0.00555	0.36091	0.00349	1.59026
INT2	473	382	0.525556	0.00473	0.424444	0.00382	1.23822
INT2	545	369	0.556122	0.00545	0.376531	0.00369	1.47696
INT2	560	322	0.580913	0.0056	0.334025	0.00322	1.73913
INT2	575	383	0.555019	0.00575	0.369691	0.00383	1.50131
INT2	588	279	0.648291	0.00588	0.307607	0.00279	2.10753
INT2	542	355	0.558187	0.00542	0.365602	0.00355	1.52676
INT2	572	376	0.58427	0.00572	0.384065	0.00376	1.52128
INT2	495	368	0.550612	0.00495	0.409344	0.00368	1.34511
INT2	590	326	0.606996	0.0059	0.335391	0.00326	1.80982
INT2	469	389	0.51652	0.00469	0.428414	0.00389	1.20566
INT2	556	364	0.571429	0.00556	0.374101	0.00364	1.52747
INT2	530	407	0.531062	0.0053	0.407816	0.00407	1.30221
INT2	482	399	0.517723	0.00482	0.428571	0.00399	1.20802
INT2	576	404	0.564153	0.00576	0.39569	0.00404	1.42574
INT2	603	374	0.591176	0.00603	0.366667	0.00374	1.6123
INT2	531	369	0.547988	0.00531	0.380805	0.00369	1.43902
INT2	532	371	0.570204	0.00532	0.397642	0.00371	1.43396
INT2	553	285	0.620651	0.00553	0.319865	0.00285	1.94035
INT2	548	387	0.571429	0.00548	0.403545	0.00387	1.41602
INT2	537	378	0.544073	0.00537	0.382979	0.00378	1.42063
INT3	617	414	0.574488	0.00617	0.385475	0.00414	1.49034
INT3	698	375	0.623214	0.00698	0.334821	0.00375	1.86133
INT3	730	372	0.633131	0.0073	0.322637	0.00372	1.96237
INT3	658	371	0.619003	0.00658	0.349012	0.00371	1.77358
INT3	689	304	0.646341	0.00689	0.285178	0.00304	2.26645
INT3	634	399	0.576888	0.00634	0.363057	0.00399	1.58897
INT3	650	383	0.588768	0.0065	0.34692	0.00383	1.69713
INT3	630	390	0.577452	0.0063	0.35747	0.0039	1.61538
INT3	603	358	0.607863	0.00603	0.360887	0.00358	1.68436
INT3	636	343	0.6139	0.00636	0.331081	0.00343	1.85423
INT3	723	370	0.639823	0.00723	0.327434	0.0037	1.95405
INT3	685	359	0.631919	0.00685	0.331181	0.00359	1.90808
INT3	718	314	0.662973	0.00718	0.289935	0.00314	2.28662
INT3	616	405	0.573023	0.00616	0.376744	0.00405	1.52099
INT3	639	355	0.615014	0.00639	0.341675	0.00355	1.8
INT3	653	386	0.593636	0.00653	0.350909	0.00386	1.69171
INT3	675	401	0.597345	0.00675	0.354867	0.00401	1.68329
INT3	685	386	0.609973	0.00685	0.343722	0.00386	1.77461
INT3	626	346	0.612524	0.00626	0.338552	0.00346	1.80925
INT3	664	392	0.597122	0.00664	0.352518	0.00392	1.69388
INT3	684	344	0.63806	0.00684	0.320896	0.00344	1.98837
INT3	611	363	0.593204	0.00611	0.352427	0.00363	1.6832
INT3	628	381	0.603846	0.00628	0.366346	0.00381	1.64829
INT3	672	382	0.602691	0.00672	0.342601	0.00382	1.75916
INT3	627	381	0.586529	0.00627	0.356408	0.00381	1.64567
INT3	694	437	0.591141	0.00694	0.372232	0.00437	1.5881
INT3	636	331	0.620488	0.00636	0.322927	0.00331	1.92145
INT3	629	325	0.623389	0.00629	0.322101	0.00325	1.93538
INT3	713	353	0.640036	0.00713	0.316876	0.00353	2.01983
INT3	652	402	0.580071	0.00652	0.357651	0.00402	1.62189
INT3	718	381	0.6195	0.00718	0.328732	0.00381	1.88451
INT3	626	322	0.629779	0.00626	0.323944	0.00322	1.9441
INT3	653	385	0.606314	0.00653	0.357474	0.00385	1.6961
INT3	661	366	0.601456	0.00661	0.33303	0.00366	1.80601
INT3	699	364	0.621886	0.00699	0.323843	0.00364	1.92033
INT3	639	369	0.610315	0.00639	0.352436	0.00369	1.73171
INT3	673	370	0.617998	0.00673	0.339761	0.0037	1.81892
INT3	639	418	0.573609	0.00639	0.375224	0.00418	1.52871
INT3	648	420	0.574468	0.00648	0.37234	0.0042	1.54286
INT3	644	394	0.600746	0.00644	0.367537	0.00394	1.63452
INT3	650	312	0.648703	0.0065	0.311377	0.00312	2.08333
INT3	617	358	0.598448	0.00617	0.347236	0.00358	1.72346
INT3	644	369	0.593002	0.00644	0.339779	0.00369	1.74526
INT3	716	399	0.608326	0.00716	0.338997	0.00399	1.79449
INT3	586	381	0.572825	0.00586	0.372434	0.00381	1.53806
INT3	675	324	0.635593	0.00675	0.305085	0.00324	2.08333
INT3	674	377	0.602324	0.00674	0.336908	0.00377	1.7878
INT3	669	402	0.594667	0.00669	0.357333	0.00402	1.66418
INT3	597	405	0.563739	0.00597	0.382436	0.00405	1.47407
INT3	663	404	0.57803	0.00663	0.352223	0.00404	1.64109
INT3	677	373	0.601243	0.00677	0.331261	0.00373	1.81501
INT3	654	361	0.614085	0.00654	0.338967	0.00361	1.81163
INT3	609	404	0.576159	0.00609	0.382214	0.00404	1.50743
INT3	633	376	0.585028	0.00633	0.347505	0.00376	1.68351
INT3	636	389	0.601703	0.00636	0.368023	0.00389	1.63496
INT3	719	388	0.619294	0.00719	0.334195	0.00388	1.85309
INT3	606	353	0.607823	0.00606	0.354062	0.00353	1.71671
INT3	658	394	0.590135	0.00658	0.353363	0.00394	1.67005
INT3	629	385	0.594518	0.00629	0.363894	0.00385	1.63377
INT3	686	397	0.609236	0.00686	0.352575	0.00397	1.72796
INT3	635	395	0.586876	0.00635	0.365065	0.00395	1.60759
INT3	689	377	0.612989	0.00689	0.335409	0.00377	1.82759
INT3	677	419	0.59075	0.00677	0.36562	0.00419	1.61575
INT3	685	384	0.600877	0.00685	0.336842	0.00384	1.78385
INT3	688	380	0.596704	0.00688	0.329575	0.0038	1.81053
INT3	643	423	0.571556	0.00643	0.376	0.00423	1.52009
INT3	620	357	0.586566	0.0062	0.337748	0.00357	1.73669
INT3	679	408	0.598765	0.00679	0.359788	0.00408	1.66422
INT3	611	366	0.604352	0.00611	0.362018	0.00366	1.6694
INT3	664	344	0.626415	0.00664	0.324528	0.00344	1.93023
INT3	641	434	0.567257	0.00641	0.384071	0.00434	1.47696
INT3	671	405	0.592756	0.00671	0.357774	0.00405	1.65679
INT3	632	346	0.624506	0.00632	0.341897	0.00346	1.82659
INT3	707	386	0.612652	0.00707	0.334489	0.00386	1.83161
INT3	709	345	0.631345	0.00709	0.307213	0.00345	2.05507
INT3	662	378	0.615242	0.00662	0.351301	0.00378	1.75132
INT3	656	413	0.579505	0.00656	0.364841	0.00413	1.58838
INT3	722	356	0.632778	0.00722	0.312007	0.00356	2.02809
INT3	636	345	0.615682	0.00636	0.333979	0.00345	1.84348
INT3	649	366	0.600926	0.00649	0.338889	0.00366	1.77322
INT3	635	341	0.612343	0.00635	0.328833	0.00341	1.86217
INT3	619	401	0.572089	0.00619	0.37061	0.00401	1.54364
INT3	658	340	0.622517	0.00658	0.321665	0.0034	1.93529
INT3	645	376	0.607345	0.00645	0.354049	0.00376	1.71543
INT3	756	392	0.636364	0.00756	0.329966	0.00392	1.92857
INT3	727	380	0.620307	0.00727	0.324232	0.0038	1.91316
INT3	645	353	0.625	0.00645	0.342054	0.00353	1.8272
INT3	658	378	0.600365	0.00658	0.344891	0.00378	1.74074
INT3	676	416	0.586806	0.00676	0.361111	0.00416	1.625
INT3	622	345	0.60447	0.00622	0.335277	0.00345	1.8029
INT3	662	376	0.603464	0.00662	0.342753	0.00376	1.76064
INT3	670	386	0.614679	0.0067	0.354128	0.00386	1.73575
INT3	677	359	0.623389	0.00677	0.330571	0.00359	1.88579
INT3	680	429	0.579216	0.0068	0.365417	0.00429	1.58508
INT3	599	389	0.579864	0.00599	0.376573	0.00389	1.53985
INT3	649	353	0.614583	0.00649	0.33428	0.00353	1.83853
INT3	631	326	0.625992	0.00631	0.323413	0.00326	1.93558
INT3	637	331	0.62451	0.00637	0.32451	0.00331	1.92447
INT3	641	385	0.586459	0.00641	0.352242	0.00385	1.66494
INT3	612	368	0.589028	0.00612	0.354187	0.00368	1.66304
INT4	693	342	0.634035	0.00693	0.3129	0.00342	2.02632
INT4	743	404	0.612026	0.00743	0.332784	0.00404	1.83911
INT4	722	373	0.620275	0.00722	0.320447	0.00373	1.93566
INT4	668	409	0.593778	0.00668	0.363556	0.00409	1.63325
INT4	714	432	0.592531	0.00714	0.358506	0.00432	1.65278
INT4	580	427	0.542056	0.0058	0.399065	0.00427	1.35831
INT4	642	392	0.590616	0.00642	0.360626	0.00392	1.63776
INT4	715	439	0.591887	0.00715	0.363411	0.00439	1.6287
INT4	652	415	0.586859	0.00652	0.373537	0.00415	1.57108
INT4	685	344	0.639589	0.00685	0.321195	0.00344	1.99128
INT4	667	439	0.573517	0.00667	0.377472	0.00439	1.51936
INT4	677	337	0.63271	0.00677	0.314953	0.00337	2.0089
INT4	664	363	0.6171	0.00664	0.337361	0.00363	1.8292
INT4	689	359	0.626364	0.00689	0.326364	0.00359	1.91922
INT4	693	389	0.612732	0.00693	0.343943	0.00389	1.78149
INT4	646	334	0.619367	0.00646	0.32023	0.00334	1.93413
INT4	692	433	0.593482	0.00692	0.371355	0.00433	1.59815
INT4	625	359	0.598659	0.00625	0.34387	0.00359	1.74095
INT4	649	374	0.595413	0.00649	0.343119	0.00374	1.73529
INT4	675	425	0.580396	0.00675	0.365434	0.00425	1.58824
INT4	665	363	0.606199	0.00665	0.330902	0.00363	1.83196
INT4	602	388	0.567389	0.00602	0.365693	0.00388	1.55155
INT4	681	378	0.608579	0.00681	0.337802	0.00378	1.80159
INT4	692	355	0.620072	0.00692	0.3181	0.00355	1.9493
INT4	653	380	0.593097	0.00653	0.345141	0.0038	1.71842
INT4	709	370	0.633036	0.00709	0.330357	0.0037	1.91622
INT4	650	383	0.588768	0.0065	0.34692	0.00383	1.69713
INT4	663	367	0.608815	0.00663	0.337006	0.00367	1.80654
INT4	666	377	0.61157	0.00666	0.346189	0.00377	1.76658
INT4	632	366	0.591207	0.00632	0.342376	0.00366	1.72678
INT4	683	355	0.637722	0.00683	0.331466	0.00355	1.92394
INT4	723	378	0.634211	0.00723	0.331579	0.00378	1.9127
INT4	708	359	0.625995	0.00708	0.317418	0.00359	1.97214
INT4	695	352	0.630672	0.00695	0.319419	0.00352	1.97443
INT4	738	325	0.664865	0.00738	0.292793	0.00325	2.27077
INT4	663	383	0.607699	0.00663	0.351054	0.00383	1.73107
INT4	715	409	0.603376	0.00715	0.345148	0.00409	1.74817
INT4	670	358	0.611872	0.0067	0.326941	0.00358	1.87151
INT4	652	377	0.591652	0.00652	0.342105	0.00377	1.72944
INT4	678	461	0.568315	0.00678	0.386421	0.00461	1.47072
INT4	659	389	0.595841	0.00659	0.351718	0.00389	1.69409
INT4	679	359	0.624655	0.00679	0.330267	0.00359	1.89136
INT4	606	335	0.608434	0.00606	0.336345	0.00335	1.80896
INT4	669	373	0.614325	0.00669	0.342516	0.00373	1.79357
INT4	774	398	0.634947	0.00774	0.326497	0.00398	1.94472
INT4	624	388	0.589792	0.00624	0.36673	0.00388	1.60825
INT4	712	389	0.619669	0.00712	0.338555	0.00389	1.83033
INT4	739	382	0.627334	0.00739	0.324278	0.00382	1.93455
INT4	680	384	0.610961	0.0068	0.345013	0.00384	1.77083
INT4	638	424	0.587477	0.00638	0.390424	0.00424	1.50472
INT4	673	399	0.591388	0.00673	0.350615	0.00399	1.68672
INT4	671	466	0.565767	0.00671	0.392917	0.00466	1.43991
INT4	671	380	0.611111	0.00671	0.346084	0.0038	1.76579
INT4	691	410	0.590094	0.00691	0.350128	0.0041	1.68537
INT4	670	349	0.623836	0.0067	0.324953	0.00349	1.91977
INT4	693	350	0.630573	0.00693	0.318471	0.0035	1.98
INT4	634	352	0.608445	0.00634	0.337812	0.00352	1.80114
INT4	704	389	0.616462	0.00704	0.34063	0.00389	1.80977
INT4	640	352	0.59869	0.0064	0.32928	0.00352	1.81818
INT4	639	397	0.588398	0.00639	0.365562	0.00397	1.60957
INT4	653	348	0.61257	0.00653	0.326454	0.00348	1.87644
INT4	700	405	0.606061	0.007	0.350649	0.00405	1.7284
INT4	648	345	0.632812	0.00648	0.336914	0.00345	1.87826
INT4	642	394	0.579946	0.00642	0.355917	0.00394	1.62944
INT4	700	435	0.576132	0.007	0.358025	0.00435	1.6092
INT4	733	352	0.644112	0.00733	0.309315	0.00352	2.08239
INT4	724	361	0.638448	0.00724	0.318342	0.00361	2.00554
INT4	688	329	0.635272	0.00688	0.303786	0.00329	2.09119
INT4	641	362	0.607583	0.00641	0.343128	0.00362	1.77072
INT4	749	359	0.63799	0.00749	0.305792	0.00359	2.08635
INT4	640	375	0.598131	0.0064	0.350467	0.00375	1.70667
INT4	714	363	0.624126	0.00714	0.317308	0.00363	1.96694
INT4	655	386	0.595996	0.00655	0.351228	0.00386	1.69689
INT4	706	397	0.610199	0.00706	0.343129	0.00397	1.77834
INT4	690	418	0.598958	0.0069	0.362847	0.00418	1.65072
INT4	635	382	0.596244	0.00635	0.358685	0.00382	1.6623
INT4	668	410	0.579358	0.00668	0.355594	0.0041	1.62927
INT4	716	368	0.620989	0.00716	0.319167	0.00368	1.94565
INT4	701	368	0.616535	0.00701	0.323659	0.00368	1.90489
INT4	691	377	0.618068	0.00691	0.337209	0.00377	1.83289
INT4	740	323	0.662489	0.0074	0.289167	0.00323	2.29102
INT4	700	337	0.636364	0.007	0.306364	0.00337	2.07715
INT4	681	362	0.624198	0.00681	0.331806	0.00362	1.88122
INT4	703	380	0.615048	0.00703	0.332458	0.0038	1.85
INT4	752	371	0.642186	0.00752	0.316823	0.00371	2.02695
INT4	662	370	0.611265	0.00662	0.341644	0.0037	1.78919
INT4	638	377	0.590741	0.00638	0.349074	0.00377	1.69231
INT4	722	396	0.614468	0.00722	0.337021	0.00396	1.82323
INT4	749	385	0.633672	0.00749	0.325719	0.00385	1.94545
INT4	661	379	0.59819	0.00661	0.342986	0.00379	1.74406
INT4	741	353	0.646033	0.00741	0.307759	0.00353	2.09915
INT4	673	354	0.6163	0.00673	0.324176	0.00354	1.90113
INT4	746	398	0.626364	0.00746	0.334173	0.00398	1.87437
INT4	645	389	0.587432	0.00645	0.354281	0.00389	1.6581
INT4	685	396	0.609431	0.00685	0.352313	0.00396	1.7298
INT4	657	367	0.611732	0.00657	0.341713	0.00367	1.79019
INT4	692	404	0.601216	0.00692	0.350999	0.00404	1.71287
INT4	695	346	0.620536	0.00695	0.308929	0.00346	2.00867
INT4	652	365	0.598165	0.00652	0.334862	0.00365	1.7863
INT4	641	436	0.559825	0.00641	0.380786	0.00436	1.47018
INT5	674	370	0.609955	0.00674	0.334842	0.0037	1.82162
INT5	699	369	0.621333	0.00699	0.328	0.00369	1.89431
INT5	705	422	0.604631	0.00705	0.361921	0.00422	1.67062
INT5	800	399	0.645161	0.008	0.321774	0.00399	2.00501
INT5	675	388	0.598404	0.00675	0.343972	0.00388	1.73969
INT5	689	425	0.580944	0.00689	0.358347	0.00425	1.62118
INT5	773	373	0.638315	0.00773	0.30801	0.00373	2.07239
INT5	721	357	0.618884	0.00721	0.306438	0.00357	2.01961
INT5	745	386	0.637297	0.00745	0.330197	0.00386	1.93005
INT5	697	332	0.650794	0.00697	0.309991	0.00332	2.0994
INT5	745	370	0.645022	0.00745	0.320346	0.0037	2.01351
INT5	713	371	0.62108	0.00713	0.323171	0.00371	1.92183
INT5	698	431	0.58459	0.00698	0.360972	0.00431	1.61949
INT5	670	351	0.616375	0.0067	0.322907	0.00351	1.90883
INT5	715	396	0.621739	0.00715	0.344348	0.00396	1.80556
INT5	773	402	0.635168	0.00773	0.33032	0.00402	1.92289
INT5	689	379	0.609195	0.00689	0.335102	0.00379	1.81794
INT5	707	339	0.636937	0.00707	0.305405	0.00339	2.08555
INT5	660	332	0.622055	0.0066	0.312912	0.00332	1.98795
INT5	755	410	0.620888	0.00755	0.337171	0.0041	1.84146
INT5	746	398	0.613992	0.00746	0.327572	0.00398	1.87437
INT5	738	411	0.610927	0.00738	0.340232	0.00411	1.79562
INT5	715	342	0.643564	0.00715	0.307831	0.00342	2.09064
INT5	720	366	0.632689	0.0072	0.321617	0.00366	1.96721
INT5	678	341	0.626039	0.00678	0.314866	0.00341	1.98827
INT5	759	393	0.622642	0.00759	0.322395	0.00393	1.9313
INT5	681	338	0.625344	0.00681	0.310376	0.00338	2.01479
INT5	687	370	0.610667	0.00687	0.328889	0.0037	1.85676
INT5	666	344	0.623596	0.00666	0.322097	0.00344	1.93605
INT5	759	401	0.624691	0.00759	0.330041	0.00401	1.89277
INT5	668	356	0.616805	0.00668	0.328717	0.00356	1.8764
INT5	763	355	0.649915	0.00763	0.302385	0.00355	2.1493
INT5	709	382	0.621385	0.00709	0.334794	0.00382	1.85602
INT5	716	378	0.624237	0.00716	0.329555	0.00378	1.89418
INT5	757	408	0.614448	0.00757	0.331169	0.00408	1.85539
INT5	686	344	0.624772	0.00686	0.313297	0.00344	1.99419
INT5	744	385	0.631043	0.00744	0.326548	0.00385	1.93247
INT5	730	391	0.611903	0.0073	0.327745	0.00391	1.86701
INT5	729	412	0.598522	0.00729	0.338259	0.00412	1.76942
INT5	724	416	0.605351	0.00724	0.347826	0.00416	1.74038
INT5	722	444	0.587948	0.00722	0.361564	0.00444	1.62613
INT5	746	422	0.609975	0.00746	0.345053	0.00422	1.76777
INT5	740	343	0.651982	0.0074	0.302203	0.00343	2.15743
INT5	690	375	0.609003	0.0069	0.33098	0.00375	1.84
INT5	749	436	0.607955	0.00749	0.353896	0.00436	1.71789
INT5	662	430	0.579685	0.00662	0.376532	0.0043	1.53953
INT5	729	376	0.630623	0.00729	0.32526	0.00376	1.93883
INT5	748	400	0.614122	0.00748	0.328407	0.004	1.87
INT5	662	428	0.56824	0.00662	0.367382	0.00428	1.54673
INT5	750	382	0.637755	0.0075	0.32483	0.00382	1.96335
INT5	659	375	0.606256	0.00659	0.344986	0.00375	1.75733
INT5	684	368	0.611807	0.00684	0.329159	0.00368	1.8587
INT5	698	368	0.63282	0.00698	0.333636	0.00368	1.89674
INT5	668	349	0.624883	0.00668	0.326473	0.00349	1.91404
INT5	767	346	0.655556	0.00767	0.295726	0.00346	2.21676
INT5	757	343	0.652586	0.00757	0.29569	0.00343	2.207
INT5	754	350	0.654514	0.00754	0.303819	0.0035	2.15429
INT5	737	348	0.656278	0.00737	0.309884	0.00348	2.11782
INT5	689	395	0.600174	0.00689	0.344077	0.00395	1.7443
INT5	686	406	0.601754	0.00686	0.35614	0.00406	1.68966
INT5	722	420	0.588907	0.00722	0.342577	0.0042	1.71905
INT5	700	389	0.605536	0.007	0.336505	0.00389	1.79949
INT5	757	402	0.622021	0.00757	0.33032	0.00402	1.88308
INT5	760	328	0.683453	0.0076	0.294964	0.00328	2.31707
INT5	668	326	0.63138	0.00668	0.308129	0.00326	2.04908
INT5	739	311	0.656889	0.00739	0.276444	0.00311	2.37621
INT5	730	390	0.617075	0.0073	0.32967	0.0039	1.87179
INT5	688	416	0.593103	0.00688	0.358621	0.00416	1.65385
INT5	708	397	0.604611	0.00708	0.339026	0.00397	1.78338
INT5	747	326	0.65815	0.00747	0.287225	0.00326	2.29141
INT5	707	375	0.630687	0.00707	0.334523	0.00375	1.88533
INT5	677	415	0.588696	0.00677	0.36087	0.00415	1.63133
INT5	766	343	0.663778	0.00766	0.297227	0.00343	2.23324
INT5	668	366	0.611722	0.00668	0.335165	0.00366	1.82514
INT5	728	369	0.623822	0.00728	0.316195	0.00369	1.9729
INT5	649	322	0.628267	0.00649	0.311713	0.00322	2.01553
INT5	693	379	0.619857	0.00693	0.338998	0.00379	1.8285
INT5	670	349	0.625584	0.0067	0.325864	0.00349	1.91977
INT5	788	360	0.654485	0.00788	0.299003	0.0036	2.18889
INT5	718	391	0.6142	0.00718	0.334474	0.00391	1.83632
INT5	624	335	0.615385	0.00624	0.330375	0.00335	1.86269
INT5	646	416	0.575245	0.00646	0.370436	0.00416	1.55288
INT5	715	386	0.615848	0.00715	0.332472	0.00386	1.85233
INT5	683	335	0.627181	0.00683	0.307622	0.00335	2.03881
INT5	743	347	0.649476	0.00743	0.303322	0.00347	2.14121
INT5	678	343	0.623162	0.00678	0.315257	0.00343	1.97668
INT5	621	359	0.607038	0.00621	0.350929	0.00359	1.72981
INT5	617	379	0.577715	0.00617	0.354869	0.00379	1.62797
INT5	720	381	0.611725	0.0072	0.323704	0.00381	1.88976
INT5	729	366	0.631716	0.00729	0.317158	0.00366	1.9918
INT5	732	398	0.622449	0.00732	0.338435	0.00398	1.8392
INT5	660	334	0.627973	0.0066	0.317793	0.00334	1.97605
INT5	737	357	0.639202	0.00737	0.309627	0.00357	2.06443
INT5	696	385	0.60786	0.00696	0.336245	0.00385	1.80779
INT5	726	442	0.579872	0.00726	0.353035	0.00442	1.64253
INT5	744	431	0.603406	0.00744	0.349554	0.00431	1.72622
INT5	696	367	0.621984	0.00696	0.327971	0.00367	1.89646
INT5	604	378	0.582449	0.00604	0.364513	0.00378	1.59788
INT5	661	423	0.574783	0.00661	0.367826	0.00423	1.56265
INT5	752	359	0.640545	0.00752	0.305792	0.00359	2.09471
INT6	667	380	0.59982	0.00667	0.341727	0.0038	1.75526
INT6	709	338	0.64808	0.00709	0.308958	0.00338	2.09763
INT6	739	379	0.627867	0.00739	0.322005	0.00379	1.94987
INT6	717	386	0.61704	0.00717	0.332186	0.00386	1.85751
INT6	708	396	0.61405	0.00708	0.343452	0.00396	1.78788
INT6	741	382	0.631175	0.00741	0.325383	0.00382	1.93979
INT6	738	356	0.638408	0.00738	0.307958	0.00356	2.07303
INT6	826	375	0.658167	0.00826	0.298805	0.00375	2.20267
INT6	706	369	0.614983	0.00706	0.321429	0.00369	1.91328
INT6	674	349	0.626394	0.00674	0.324349	0.00349	1.93123
INT6	691	328	0.653119	0.00691	0.310019	0.00328	2.10671
INT6	749	410	0.616969	0.00749	0.337727	0.0041	1.82683
INT6	677	374	0.614896	0.00677	0.339691	0.00374	1.81016
INT6	703	360	0.630493	0.00703	0.32287	0.0036	1.95278
INT6	759	355	0.640506	0.00759	0.299578	0.00355	2.13803
INT6	768	343	0.643755	0.00768	0.28751	0.00343	2.23907
INT6	700	344	0.635786	0.007	0.312443	0.00344	2.03488
INT6	750	357	0.641026	0.0075	0.305128	0.00357	2.10084
INT6	690	378	0.609541	0.0069	0.333922	0.00378	1.8254
INT6	669	404	0.59839	0.00669	0.36136	0.00404	1.65594
INT6	720	380	0.636042	0.0072	0.335689	0.0038	1.89474
INT6	703	315	0.652739	0.00703	0.292479	0.00315	2.23175
INT6	645	375	0.59447	0.00645	0.345622	0.00375	1.72
INT6	700	436	0.591216	0.007	0.368243	0.00436	1.6055
INT6	662	362	0.6141	0.00662	0.335807	0.00362	1.82873
INT6	727	341	0.656137	0.00727	0.307762	0.00341	2.13196
INT6	679	352	0.623508	0.00679	0.323232	0.00352	1.92898
INT6	735	384	0.626065	0.00735	0.327087	0.00384	1.91406
INT6	666	362	0.618959	0.00666	0.336431	0.00362	1.83978
INT6	749	347	0.661077	0.00749	0.306267	0.00347	2.1585
INT6	682	394	0.59356	0.00682	0.342907	0.00394	1.73096
INT6	751	438	0.599362	0.00751	0.349561	0.00438	1.71461
INT6	688	352	0.617594	0.00688	0.315978	0.00352	1.95455
INT6	725	360	0.638204	0.00725	0.316901	0.0036	2.01389
INT6	748	364	0.642612	0.00748	0.312715	0.00364	2.05495
INT6	728	301	0.677209	0.00728	0.28	0.00301	2.4186
INT6	732	378	0.62192	0.00732	0.321155	0.00378	1.93651
INT6	760	365	0.647911	0.0076	0.311168	0.00365	2.08219
INT6	697	387	0.610333	0.00697	0.338879	0.00387	1.80103
INT6	674	349	0.618916	0.00674	0.320478	0.00349	1.93123
INT6	662	363	0.612396	0.00662	0.3358	0.00363	1.82369
INT6	727	380	0.627265	0.00727	0.327869	0.0038	1.91316
INT6	715	400	0.608511	0.00715	0.340426	0.004	1.7875
INT6	758	373	0.635373	0.00758	0.312657	0.00373	2.03217
INT6	702	423	0.596939	0.00702	0.359694	0.00423	1.65957
INT6	724	377	0.614601	0.00724	0.320034	0.00377	1.92042
INT6	766	379	0.637802	0.00766	0.31557	0.00379	2.02111
INT6	766	398	0.630453	0.00766	0.327572	0.00398	1.92462
INT6	609	382	0.573446	0.00609	0.359699	0.00382	1.59424
INT6	738	342	0.641739	0.00738	0.297391	0.00342	2.15789
INT6	726	396	0.624785	0.00726	0.340792	0.00396	1.83333
INT6	701	355	0.631532	0.00701	0.31982	0.00355	1.97465
INT6	687	321	0.629698	0.00687	0.294225	0.00321	2.14019
INT6	701	417	0.591062	0.00701	0.351602	0.00417	1.68106
INT6	660	384	0.608295	0.0066	0.353917	0.00384	1.71875
INT6	749	369	0.644024	0.00749	0.317283	0.00369	2.02981
INT6	656	372	0.609099	0.00656	0.345404	0.00372	1.76344
INT6	771	302	0.689624	0.00771	0.270125	0.00302	2.55298
INT6	700	358	0.628366	0.007	0.321364	0.00358	1.95531
INT6	687	407	0.591731	0.00687	0.35056	0.00407	1.68796
INT6	694	337	0.638454	0.00694	0.310028	0.00337	2.05935
INT6	754	367	0.642796	0.00754	0.312873	0.00367	2.0545
INT6	768	391	0.631579	0.00768	0.321546	0.00391	1.96419
INT6	642	387	0.595547	0.00642	0.358998	0.00387	1.65891
INT6	711	311	0.653493	0.00711	0.285846	0.00311	2.28617
INT6	702	368	0.628469	0.00702	0.329454	0.00368	1.90761
INT6	676	375	0.609009	0.00676	0.337838	0.00375	1.80267
INT6	723	383	0.625433	0.00723	0.331315	0.00383	1.88773
INT6	724	396	0.609428	0.00724	0.333333	0.00396	1.82828
INT6	719	347	0.638544	0.00719	0.308171	0.00347	2.07205
INT6	734	372	0.633305	0.00734	0.320966	0.00372	1.97312
INT6	731	374	0.62963	0.00731	0.322136	0.00374	1.95455
INT6	696	372	0.601036	0.00696	0.321244	0.00372	1.87097
INT6	724	354	0.640141	0.00724	0.312997	0.00354	2.0452
INT6	709	349	0.639892	0.00709	0.314982	0.00349	2.03152
INT6	668	346	0.626642	0.00668	0.324578	0.00346	1.93064
INT6	726	398	0.611111	0.00726	0.335017	0.00398	1.82412
INT6	719	360	0.641392	0.00719	0.321142	0.0036	1.99722
INT6	672	404	0.582322	0.00672	0.350087	0.00404	1.66337
INT6	732	407	0.615643	0.00732	0.342304	0.00407	1.79853
INT6	720	341	0.637733	0.0072	0.302037	0.00341	2.11144
INT6	744	383	0.632116	0.00744	0.325404	0.00383	1.94256
INT6	698	391	0.608014	0.00698	0.340592	0.00391	1.78517
INT6	683	334	0.634169	0.00683	0.310121	0.00334	2.04491
INT6	730	405	0.617597	0.0073	0.34264	0.00405	1.80247
INT6	769	315	0.658955	0.00769	0.269923	0.00315	2.44127
INT6	735	432	0.601966	0.00735	0.353808	0.00432	1.70139
INT6	699	388	0.606245	0.00699	0.336513	0.00388	1.80155
INT6	634	356	0.60728	0.00634	0.340996	0.00356	1.7809
INT6	700	432	0.594732	0.007	0.367035	0.00432	1.62037
INT6	741	451	0.581176	0.00741	0.353725	0.00451	1.64302
INT6	758	364	0.640203	0.00758	0.307432	0.00364	2.08242
INT6	735	387	0.620253	0.00735	0.326582	0.00387	1.89922
INT6	780	342	0.663265	0.0078	0.290816	0.00342	2.2807
INT6	798	428	0.63789	0.00798	0.342126	0.00428	1.86449
INT6	677	366	0.617138	0.00677	0.333637	0.00366	1.84973
INT6	702	399	0.606742	0.00702	0.344857	0.00399	1.7594
INT6	753	384	0.635443	0.00753	0.324051	0.00384	1.96094
INT6	701	338	0.651487	0.00701	0.314126	0.00338	2.07396
INT6	680	371	0.611511	0.0068	0.333633	0.00371	1.83288
