# Supplementary material for: Determining the probability of hemiplasy in the presence of incomplete lineage sorting and introgression
Source: eLife. 2020 Dec 21;9:e63753. doi: 10.7554/eLife.63753 (PMC7800383; doi:10.7554/eLife.63753)
Supplement: Supplementary file 1. — 'ID’: the ID of the internalbranch in the full lizard phylogeny, as labeled in Figure 1 —figure supplement 1. 'sCF’: the value of the site concordance factor for the branch, averaged over 100 randomly sampled quartets.'sDF1’ and'sDF2’: the site discordance factors for the first and second most common discordant site patterns at each branch, respectively.'sN’: the average number of informative sites averaged across the sampled quartets at each branch.'Length’ is the length of the internal branch in substitutions per site. -Table 2: Trios involving green-blooded species which were evaluated for evidence of introgression using D statistics. Species are listed in the order P1, P2, P3, where an excess of shared P1/P3 or P2/P3 alleles would indicate evidence of introgression. Lygosoma sp was used as the outgroup for each trio. Table 3: D statistic results for the 12 trios listed in Table 1, estimated from the concatenated alignment of ultra-conserved elements (UCEs). Significance was evaluated for each trio by bootstrap-sampling the UCEs to generate a null distribution of alignments, and asking how often the bootstrap distribution of 1000 D statistics was at least as extreme as the observed value. [file elife-63753-supp1.xlsx]

## Sheet: Table 1
Supplementary Table 1: Site concordance factors from IQtree. ”ID”: the ID of the internal branch in the full lizard phylogeny, as labelled in Supplementary Figure 6.
”sCF”: the value of the site concordance factor for the branch, averaged over 100 randomly sampled quartets.
”sDF1” and ”sDF2”: the site discordance factors for the first and second most common discordant site patterns at each branch, respectively
”sN”: the average number of informative sites averaged across the sampled quartets at each branch.
”Length” is the length of the internal branch in substitutions per site.
ID	gCF	gDF1	gDF2	gN	Label	Length
44	97.68	0.52	0.39	2288		0.0269539
45	74.05	5.09	4.09	2297		0.0127777
46	41.85	7.8	5.71	2294		0.00479676
47	20.93	9.07	8.35	2370		0.00150258
48	23.35	1.99	2.64	2762		0.00235179
49	15.24	4.39	4.12	2527		0.00105067
50	17.31	6.34	8.56	2478		0.000819417
51	40.46	2.72	1.14	2541		0.0033454
52	15.09	8.2	7.66	2572		0.000551229
53	27.65	4.83	3.7	2814		0.00129594
54	31.63	11.65	10.56	1742		0.00128157
55	20.62	5.91	7.84	2794		0.000919157
56	45.76	5.28	8.94	1744		0.00317694
57	69.17	0.65	0.81	2462		0.00621371
58	19.42	0.9	0.96	3219		0.00220984
59	19.71	0.77	1.15	3136		0.00216061
60	51.52	1.66	1.92	2296		0.00674802
61	49.67	6.89	19.12	769		0.00449816
62	19.64	1.5	2.25	3065		0.00187587
63	11.49	1.38	1.6	3124		0.000882666
64	11.6	1.13	1.54	3190		0.00089597
65	6.49	1.89	3.17	2804		0.000379724
66	4.37	4.22	4.71	2632		0.000186743
67	18.18	2.69	2.69	2905		0.00109844
68	33.31	4.08	4.28	2501		0.00167311
69	36.96	11.32	11.09	1767		0.00117793
70	31.54	5.54	4.94	2023		0.0018396
71	20.19	3.22	2.22	1709		0.00122739
72	29.12	1.22	0.93	2699		0.00196959
73	41.85	7	5.42	2344		0.00237658
74	37.83	14.42	12.02	2046		0.00151573
75	17.05	1.92	2	2546		0.00119492
76	22.74	9.61	7.82	1561		0.00146845
77	8.58	5.12	5.56	2284		0.000422247
78	8.8	2.68	4.8	2875		0.000836614
79	7.83	7.88	6.49	2311		0.000607296
80	20.68	6.52	4.35	2345		0.0016005
81	78.46	1.39	0.79	2159		0.0105833
82	23.87	8.84	12.18	1437		0.00174971
83	15.69	7.94	9.9	1020		0.00102174

## Sheet: Table 2
Supplementary Table 2: Trios involving green-blooded species which were evaluated for evidence of introgression using D statistics.
Species are listed in the order P1, P2, P3, where an excess of shared P1/P3 or P2/P3 alleles would indicate evidence of introgression. Lygosoma sp was used as the outgroup for each trio.
Trio	Species
1	Lipinia_longiceps.Prasinohaema_sp_nov_CCA01623.Prasinohaema_virens
2	Lipinia_longiceps.Prasinohaema_sp_nov_CCA01623.Prasinohaema_flavipes
3	Lipinia_longiceps.Prasinohaema_sp_nov_CCA01623.Prasinohaema_prehensicauda
4	Lipinia_longiceps.Prasinohaema_sp_nov_CCA01623.Prasinohaema_semoni
5	Lipinia_longiceps.Prasinohaema_sp_nov_CCA01623.Prasinohaema_sp_nov_CCA01005
6	Lipinia_longiceps.Prasinohaema_virens.Prasinohaema_semoni
7	Lipinia_longiceps.Prasinohaema_virens.Prasinohaema_prehensicauda
8	Lipinia_longiceps.Prasinohaema_virens.Prasinohaema_sp_nov_CCA01005
9	Lipinia_longiceps.Prasinohaema_virens.Prasinohaema_flavipes
10	Prasinohaema_sp_nov_CCA01005.Prasinohaema_flavipes.Prasinohaema_prehensicauda
11	Prasinohaema_sp_nov_CCA01005.Prasinohaema_flavipes.Prasinohaema_semoni
12	Prasinohaema_sp_nov_CCA01005.Prasinohaema_prehensicauda.Prasinohaema_semoni

## Sheet: Table 3
Supplementary Table 3: D statistic results for the 12 trios listed in Table 1, estimated from the concatenated alignment of ultra-conserved elements (UCEs).
Significance was evaluated for each trio by bootstrap-sampling the UCEs to generate a null distribution of alignments, and asking how often the bootstrap distribution of 1000 D statistics was at least as extreme as the observed value.
Trio	ABBA	BABA	D	stdev	CI-lower	CI-upper	p-val
1	301	322	-0.0337079	0.0420909	-0.116206	0.0487903	0.214
2	240	280	-0.0769231	0.0495943	-0.174128	0.0202818	0.079
3	306	308	-0.00325733	0.0446167	-0.0907061	0.0841914	0.491
4	282	313	-0.0521008	0.0446109	-0.139538	0.0353365	0.137
5	289	326	-0.0601626	0.0418423	-0.142173	0.0218483	0.074
6	396	402	-0.0075188	0.0376346	-0.0812827	0.0662451	0.425
7	442	430	0.0137615	0.0373762	-0.0594958	0.0870188	0.333
8	437	439	-0.00228311	0.0383428	-0.077435	0.0728688	0.493
9	374	360	0.0190736	0.0406349	-0.0605709	0.098718	0.306
10	213	186	0.0676692	0.0558389	-0.0417751	0.177113	0.123
11	185	176	0.0249307	0.0561836	-0.0851891	0.135051	0.327
12	313	295	0.0296053	0.0422376	-0.0531805	0.112391	0.265
